# Supplementary material for: Regioselective synthesis of novel and diverse naphtho[1,2-b]furan-3-carboxamides and benzofuran-3-carboxamides by cascade formal [3 + 2] cycloaddition
Source: Royal Society of Chemistry journal article supplement (doi:10.1039/c4ra07862d), 2014-01-01
Supplement: c4ra07862d1.pdf [file c4ra07862d1.pdf]

## Supporting Information

# Regioselective Synthesis of Novel and Diverse Naphtho[1,2-*b*]furan-3-carboxamides and Benzofuran-3-carboxamides by Cascade Formal [3 + 2] Cycloaddition

Likai Xia and Yong Rok Lee\*

School of Chemical Engineering, Yeungnam University, Gyeongsan 712-749, Republic of Korea

## Contents

### Naphtho[1,2-*b*]furans

|                                                                       |     |
|-----------------------------------------------------------------------|-----|
| <sup>1</sup> H and <sup>13</sup> C NMR Spectra of Compound (7) .....  | S1  |
| HRMS spectrum of Compound (7) .....                                   | S2  |
| <sup>1</sup> H and <sup>13</sup> C NMR Spectra of Compound (8) .....  | S3  |
| HRMS spectrum of Compound (8) .....                                   | S4  |
| <sup>1</sup> H and <sup>13</sup> C NMR Spectra of Compound (9) .....  | S5  |
| HRMS spectrum of Compound (9) .....                                   | S6  |
| <sup>1</sup> H and <sup>13</sup> C NMR Spectra of Compound (10) ..... | S7  |
| HRMS spectrum of Compound (10) .....                                  | S8  |
| <sup>1</sup> H and <sup>13</sup> C NMR Spectra of Compound (11) ..... | S9  |
| HRMS spectrum of Compound (11) .....                                  | S10 |
| <sup>1</sup> H and <sup>13</sup> C NMR Spectra of Compound (12) ..... | S11 |
| HRMS spectrum of Compound (12) .....                                  | S12 |
| <sup>1</sup> H and <sup>13</sup> C NMR Spectra of Compound (13) ..... | S13 |
| HRMS spectrum of Compound (13) .....                                  | S14 |
| <sup>1</sup> H and <sup>13</sup> C NMR Spectra of Compound (14) ..... | S15 |
| HRMS spectrum of Compound (14) .....                                  | S16 |
| <sup>1</sup> H and <sup>13</sup> C NMR Spectra of Compound (15) ..... | S17 |
| HRMS spectrum of Compound (15) .....                                  | S18 |
| <sup>1</sup> H and <sup>13</sup> C NMR Spectra of Compound (16) ..... | S19 |
| HRMS spectrum of Compound (16) .....                                  | S20 |

|                                                                     |     |
|---------------------------------------------------------------------|-----|
| $^1\text{H}$ and $^{13}\text{C}$ NMR Spectra of Compound (17) ..... | S21 |
| HRMS spectrum of Compound (17) .....                                | S22 |
| $^1\text{H}$ and $^{13}\text{C}$ NMR Spectra of Compound (18) ..... | S23 |
| HRMS spectrum of Compound (18) .....                                | S24 |
| $^1\text{H}$ and $^{13}\text{C}$ NMR Spectra of Compound (19) ..... | S25 |
| HRMS spectrum of Compound (19) .....                                | S26 |
| $^1\text{H}$ and $^{13}\text{C}$ NMR Spectra of Compound (20) ..... | S27 |
| HRMS spectrum of Compound (20) .....                                | S28 |
| $^1\text{H}$ and $^{13}\text{C}$ NMR Spectra of Compound (21) ..... | S29 |
| HRMS spectrum of Compound (21) .....                                | S30 |
| $^1\text{H}$ and $^{13}\text{C}$ NMR Spectra of Compound (22) ..... | S31 |
| HRMS spectrum of Compound (22) .....                                | S32 |
| $^1\text{H}$ and $^{13}\text{C}$ NMR Spectra of Compound (23) ..... | S33 |
| HRMS spectrum of Compound (23) .....                                | S34 |
| $^1\text{H}$ and $^{13}\text{C}$ NMR Spectra of Compound (26) ..... | S35 |
| HRMS spectrum of Compound (26) .....                                | S36 |

## **Benzofurans**

|                                                                     |     |
|---------------------------------------------------------------------|-----|
| $^1\text{H}$ and $^{13}\text{C}$ NMR Spectra of Compound (27) ..... | S37 |
| HRMS spectrum of Compound (27) .....                                | S38 |
| $^1\text{H}$ and $^{13}\text{C}$ NMR Spectra of Compound (28) ..... | S39 |
| HRMS spectrum of Compound (28) .....                                | S40 |
| $^1\text{H}$ and $^{13}\text{C}$ NMR Spectra of Compound (29) ..... | S41 |
| HRMS spectrum of Compound (29) .....                                | S42 |
| $^1\text{H}$ and $^{13}\text{C}$ NMR Spectra of Compound (30) ..... | S43 |
| HRMS spectrum of Compound (30) .....                                | S44 |
| $^1\text{H}$ and $^{13}\text{C}$ NMR Spectra of Compound (31) ..... | S45 |
| HRMS spectrum of Compound (31) .....                                | S46 |
| $^1\text{H}$ and $^{13}\text{C}$ NMR Spectra of Compound (32) ..... | S47 |
| HRMS spectrum of Compound (32) .....                                | S48 |
| $^1\text{H}$ and $^{13}\text{C}$ NMR Spectra of Compound (33) ..... | S49 |
| HRMS spectrum of Compound (33) .....                                | S50 |

|                                                                       |     |
|-----------------------------------------------------------------------|-----|
| <sup>1</sup> H and <sup>13</sup> C NMR Spectra of Compound (34) ..... | S51 |
| HRMS spectrum of Compound (34) .....                                  | S52 |
| <sup>1</sup> H and <sup>13</sup> C NMR Spectra of Compound (35) ..... | S53 |
| HRMS spectrum of Compound (35) .....                                  | S54 |
| <sup>1</sup> H and <sup>13</sup> C NMR Spectra of Compound (36) ..... | S55 |
| HRMS spectrum of Compound (36) .....                                  | S56 |
| <sup>1</sup> H and <sup>13</sup> C NMR Spectra of Compound (37) ..... | S57 |
| HRMS spectrum of Compound (37) .....                                  | S58 |
| <sup>1</sup> H and <sup>13</sup> C NMR Spectra of Compound (38) ..... | S59 |
| HRMS spectrum of Compound (38) .....                                  | S60 |
| <sup>1</sup> H and <sup>13</sup> C NMR Spectra of Compound (39) ..... | S61 |
| HRMS spectrum of Compound (39) .....                                  | S62 |
| <sup>1</sup> H and <sup>13</sup> C NMR Spectra of Compound (40) ..... | S63 |
| HRMS spectrum of Compound (40) .....                                  | S64 |
| <sup>1</sup> H and <sup>13</sup> C NMR Spectra of Compound (41) ..... | S65 |
| HRMS spectrum of Compound (41) .....                                  | S66 |

<sup>1</sup>H NMR of Compound 7

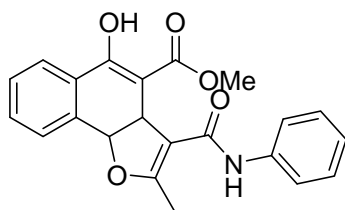

300 MHz, CDCl<sub>3</sub> + DMSO-d<sub>6</sub>

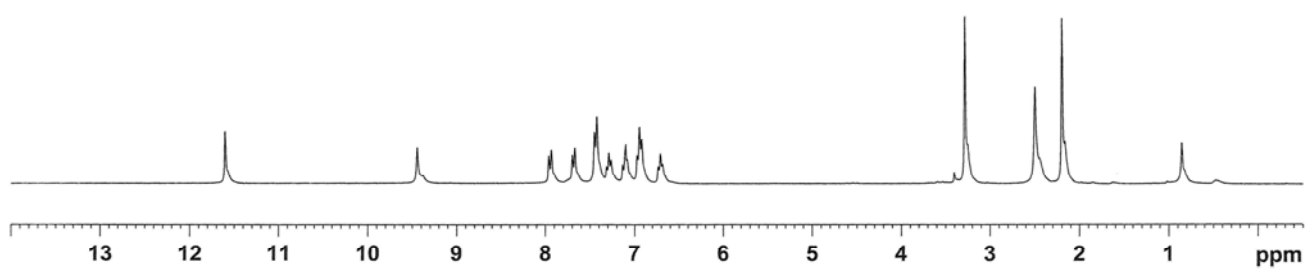

<sup>13</sup>C NMR of Compound 7

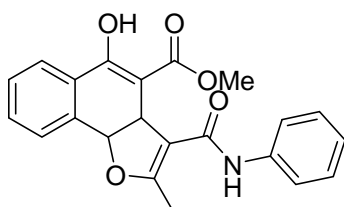

75 MHz, CDCl<sub>3</sub> + DMSO-d<sub>6</sub>

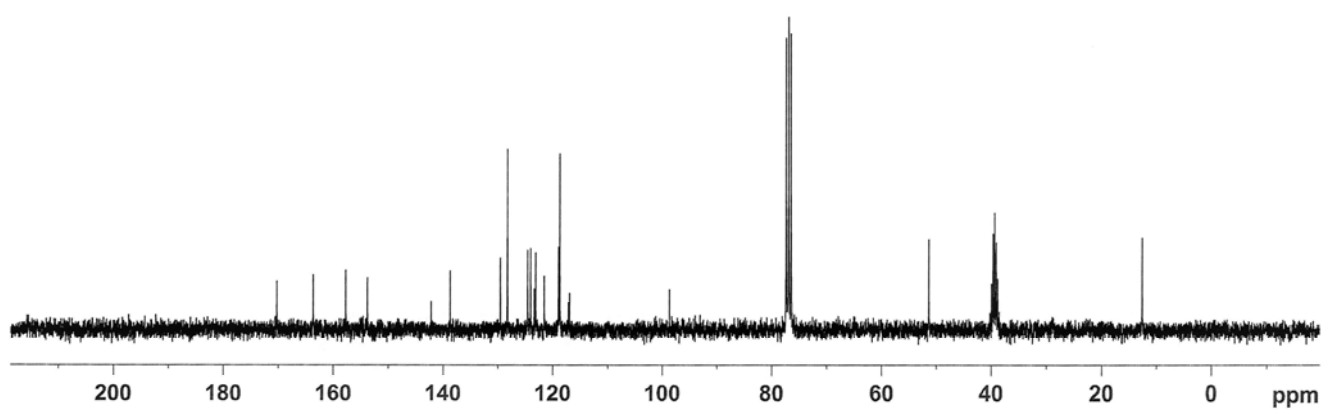

[ Mass Spectrum ]  
 Date : 02-Dec-2013 11:37  
 Sample : -  
 Note : -  
 Inlet : Direct Ion Mode : EI+  
 Spectrum Type : Normal Ion (EF-Linear)  
 RT : 1.08 min Scan# : (22,23)  
 BP : m/z 375.1104 Int. : 54.87  
 Output m/z range : 347.0000 to 407.0000 Cut Level : 0.00 %

Mass Spectrum of Compound 7

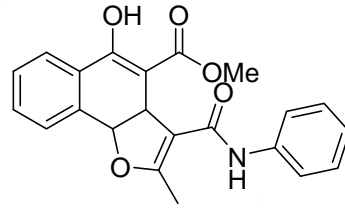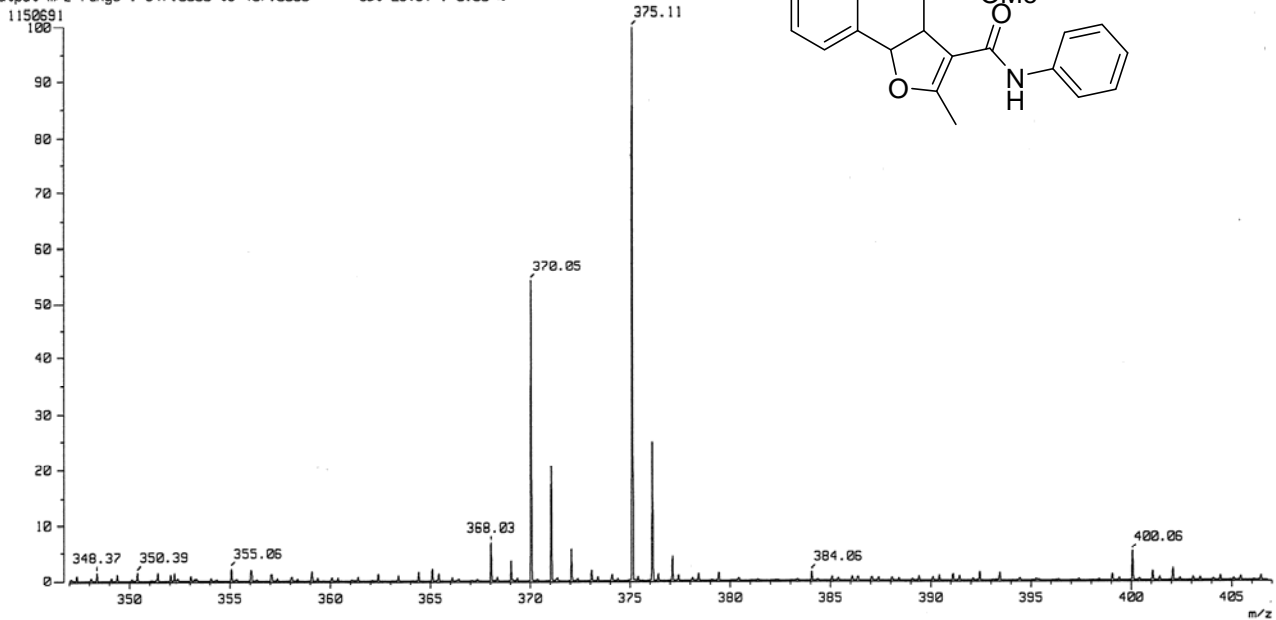

[ Elemental Composition ]

Data : x9-1-C22H19NO5 Date : 02-Dec-2013 11:37  
 Sample : -  
 Note : -  
 Inlet : Direct Ion Mode : EI+  
 RT : 1.08 min Scan# : (22,23)  
 Elements : C 22/0, H 19/0, N 1/0, O 5/0  
 Mass Tolerance : 1000ppm, 1mmu if m/z < 1, 3mmu if m/z > 3  
 Unsaturation (U.S.) : -0.5 - 100.0

| Observed m/z | Int%  | Err [ppm / mmu] | U.S. Composition     |
|--------------|-------|-----------------|----------------------|
| 370.0477     | 54.2  |                 |                      |
| 371.0526     | 20.7  |                 |                      |
| 375.1104     | 100.0 | -0.7 / -0.3     | 15.0 C 22 H 17 N O 5 |
| 376.1136     | 25.0  |                 |                      |

<sup>1</sup>H NMR of Compound **8**

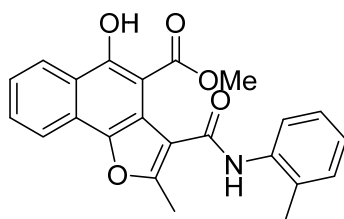

300 MHz, DMSO-d<sub>6</sub>

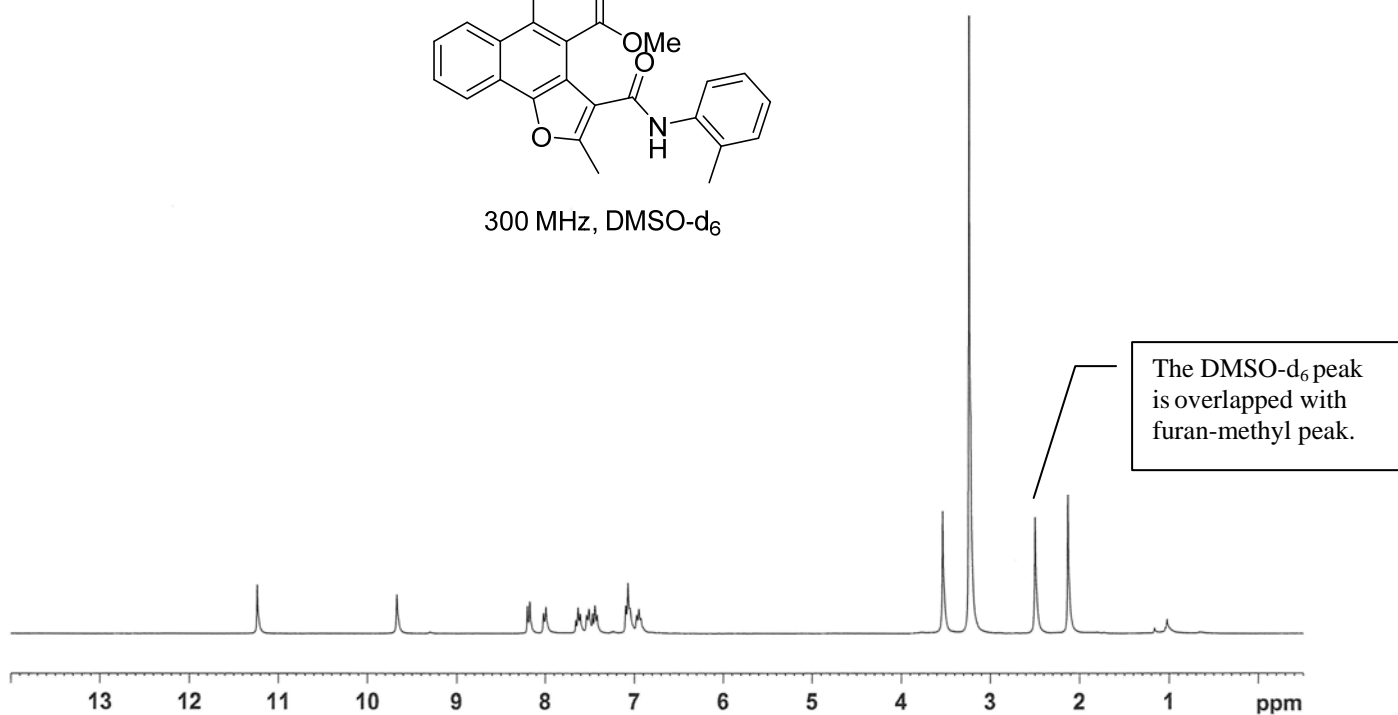

<sup>13</sup>C NMR of Compound **8**

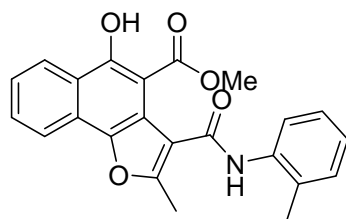

75 MHz, DMSO-d<sub>6</sub>

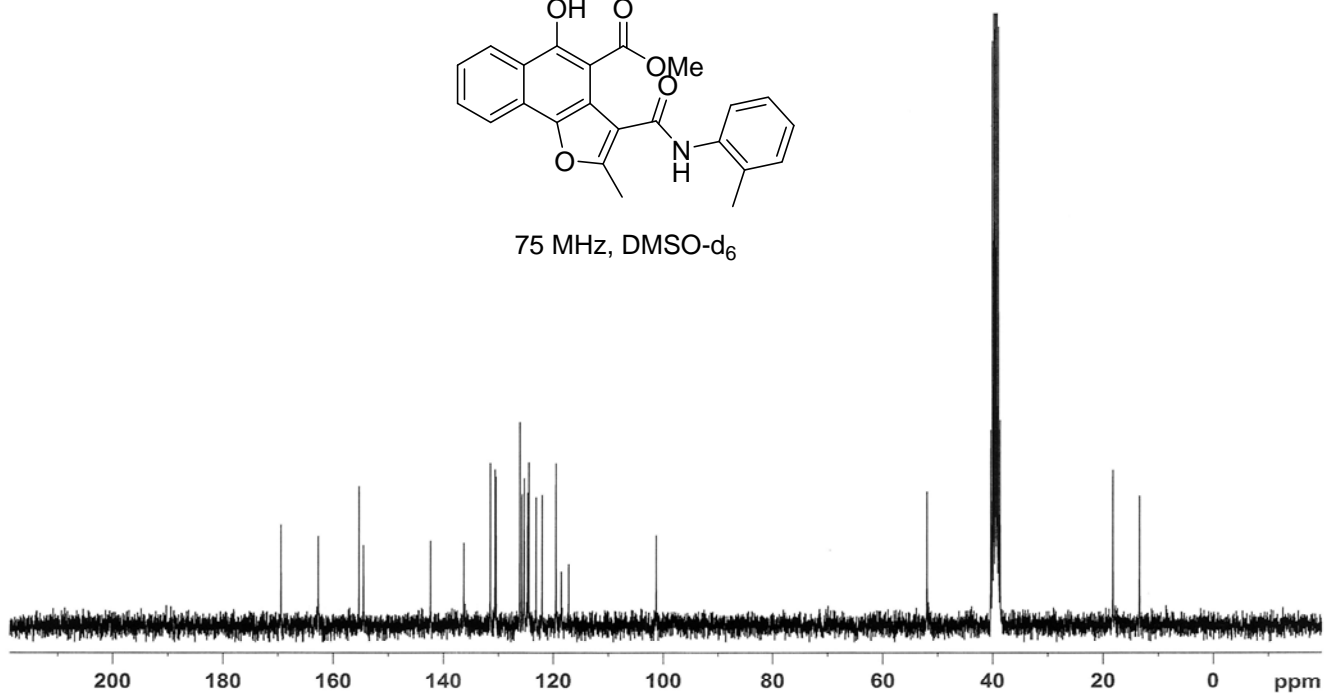

[ Mass Spectrum ]  
 Date : 04-Nov-2013 13:41  
 Sample : -  
 Note : -  
 Inlet : Direct Ion Mode : EI+  
 Spectrum Type : Normal Ion [EF-Linear]  
 RT : 0.88 min Scan# : (18,19)  
 BP : m/z 389.1261 Int. : 28.97  
 Output m/z range : 351.0000 to 421.0000 Cut Level : 0.00 %

Mass Spectrum of Compound 8

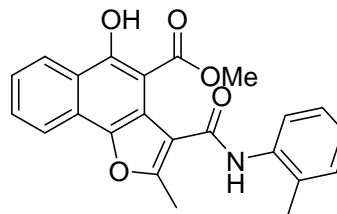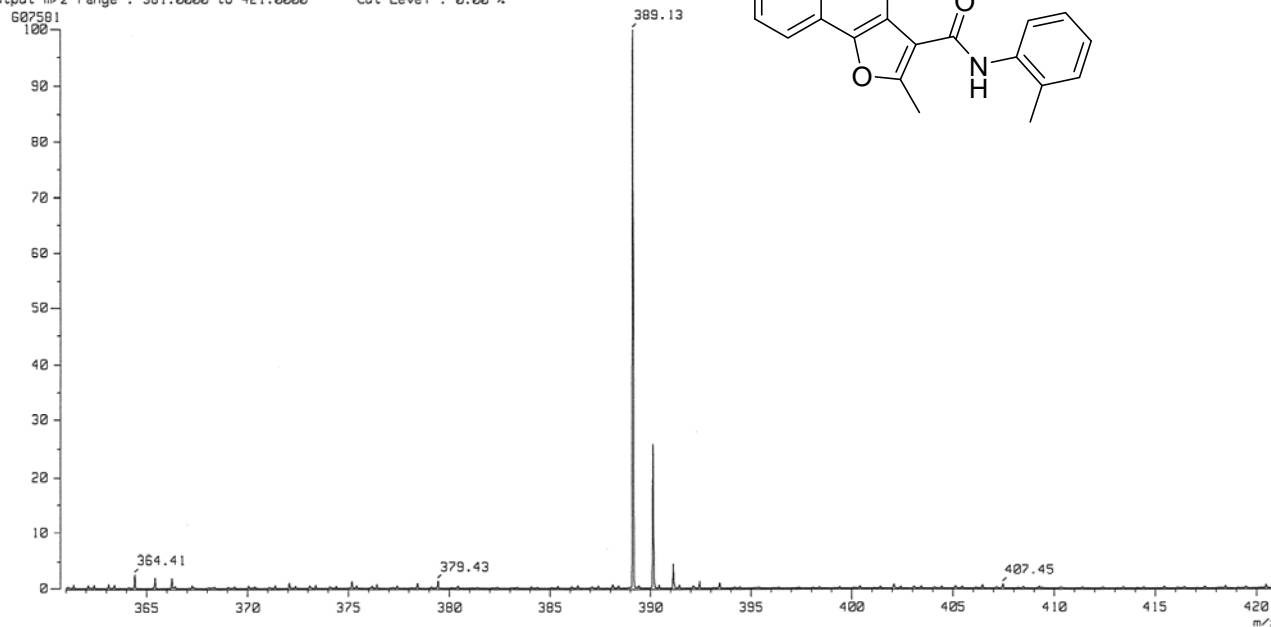

[ Elemental Composition ]

Data : x9-2-C23H21NO5 Date : 04-Nov-2013 13:41  
 Sample : -  
 Note : -  
 Inlet : Direct Ion Mode : EI+  
 RT : 0.88 min Scan# : (18,19)  
 Elements : C 23/0, H 21/0, N 1/0, O 5/0  
 Mass Tolerance : 1000ppm, 1mmu if m/z < 1, 3mmu if m/z > 3  
 Unsaturation (U.S.) : -0.5 - 100.0

| Observed m/z | Int%  | Err [ppm / mmu] | U.S. Composition     |
|--------------|-------|-----------------|----------------------|
| 389.1261     | 100.0 | -0.6 / -0.2     | 15.0 C 23 H 19 N O 5 |
| 390.1309     | 25.8  |                 |                      |

<sup>1</sup>H NMR of Compound 9

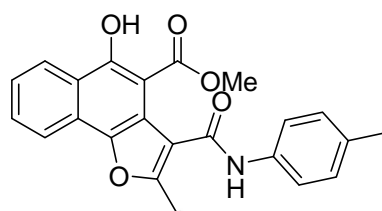

300 MHz, DMSO-d<sub>6</sub>

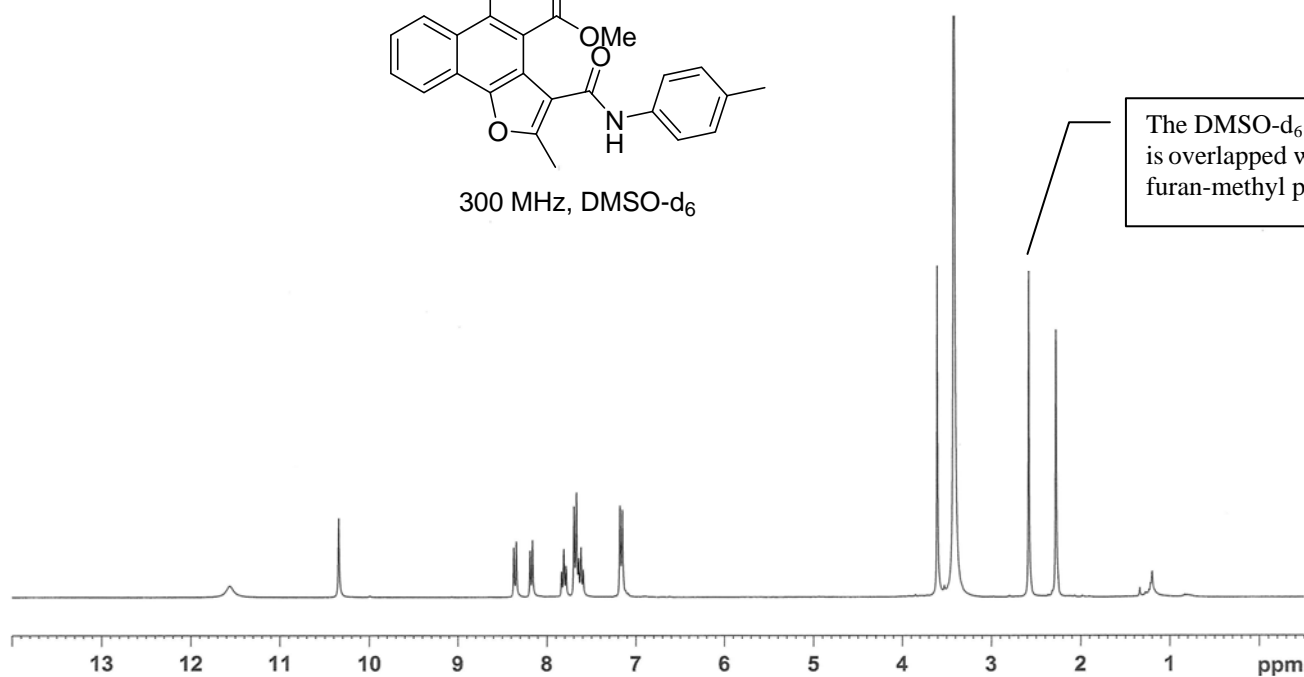

The DMSO-d<sub>6</sub> peak is overlapped with furan-methyl peak.

<sup>13</sup>C NMR of Compound 9

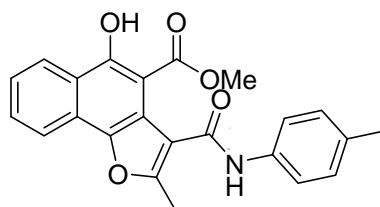

75 MHz, DMSO-d<sub>6</sub>

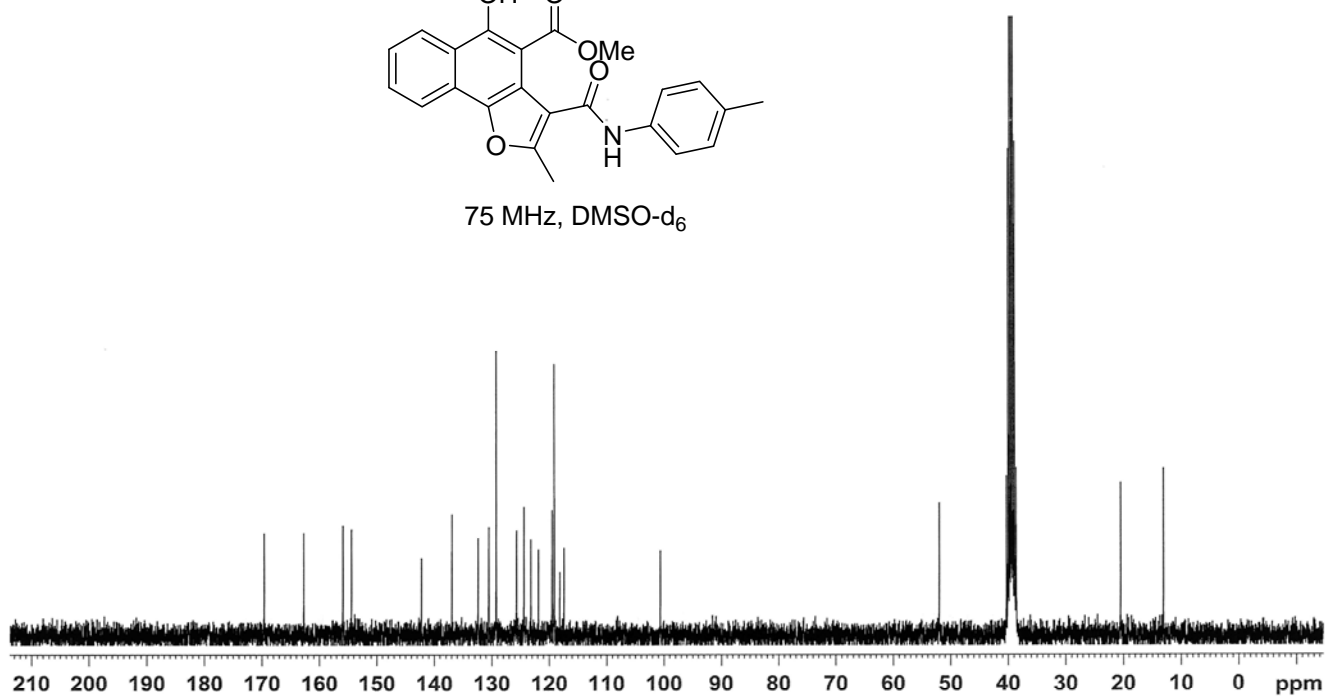



[ Mass Spectrum ]  
 Date : 04-Nov-2013 14:01  
 Sample : -  
 Note : -  
 Inlet : Direct Ion Mode : EI+  
 Spectrum Type : Normal Ion [EF-Linear]  
 RT : 1.08 min Scan# : (22,23)  
 BP : m/z 389.1265 Int. : 25.12  
 Output m/z range : 351.0000 to 421.0000 Cut Level : 0.00 %

Mass Spectrum of Compound 9

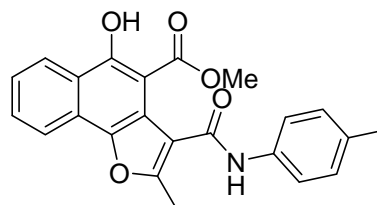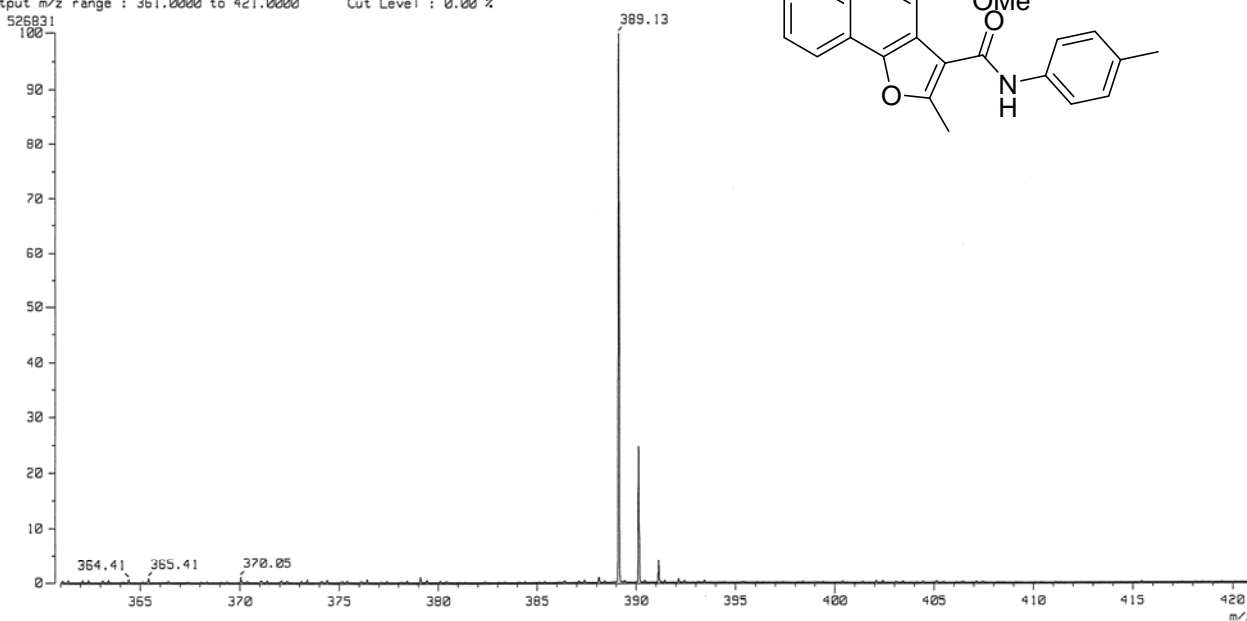

[ Elemental Composition ]

Date : 04-Nov-2013 14:01  
 Data : x9-3-C23H21NO5  
 Sample : -  
 Note : -  
 Inlet : Direct Ion Mode : EI+  
 RT : 1.08 min Scan# : (22,23)  
 Elements : C 23/0, H 21/0, N 1/0, O 5/0  
 Mass Tolerance : 1000ppm, 1mmu if m/z < 1, 2mmu if m/z > 2  
 Unsaturation (U.S.) : -0.5 - 100.0

| Observed m/z | Int%  | Err [ppm / mmu] | U.S. Composition     |
|--------------|-------|-----------------|----------------------|
| 389.1265     | 100.0 | +0.4 / +0.2     | 15.0 C 23 H 19 N O 5 |
| 390.1313     | 24.8  |                 |                      |

<sup>1</sup>H NMR of Compound 10

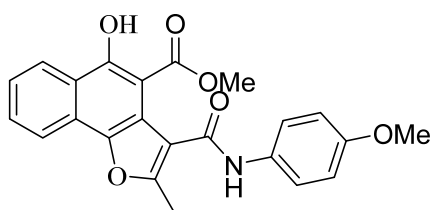

300 MHz, DMSO-d<sub>6</sub>

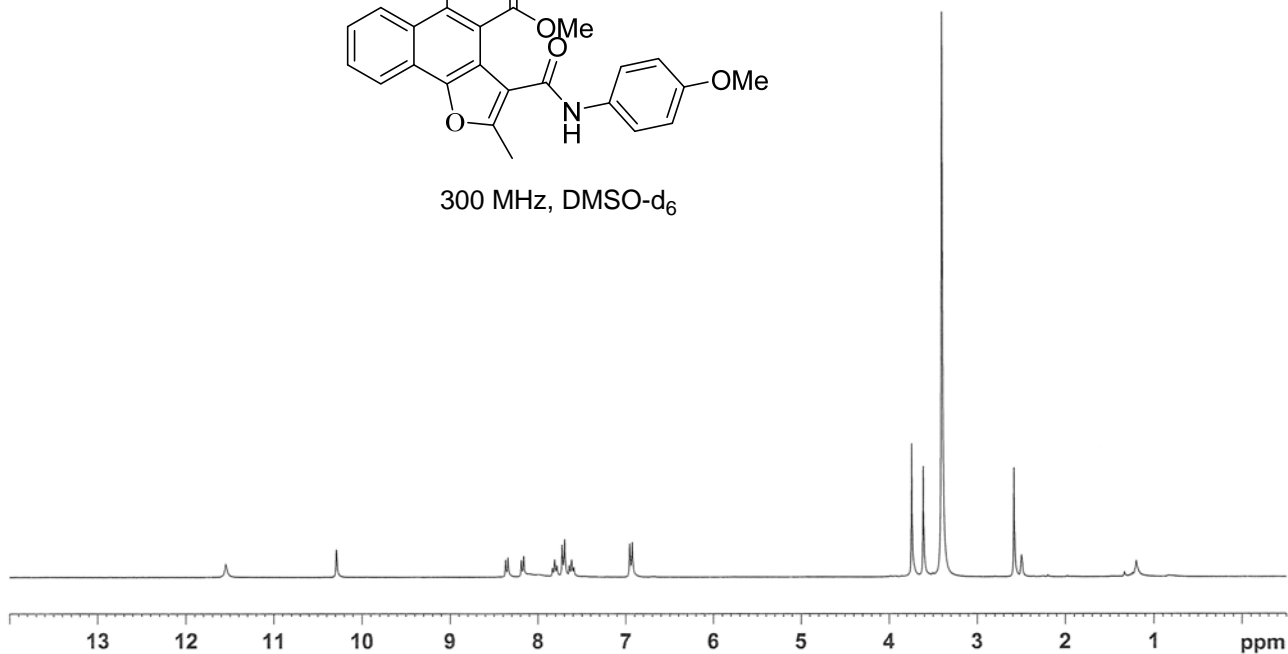

<sup>13</sup>C NMR of Compound 10

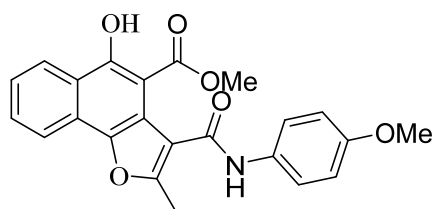

75 MHz, DMSO-d<sub>6</sub>

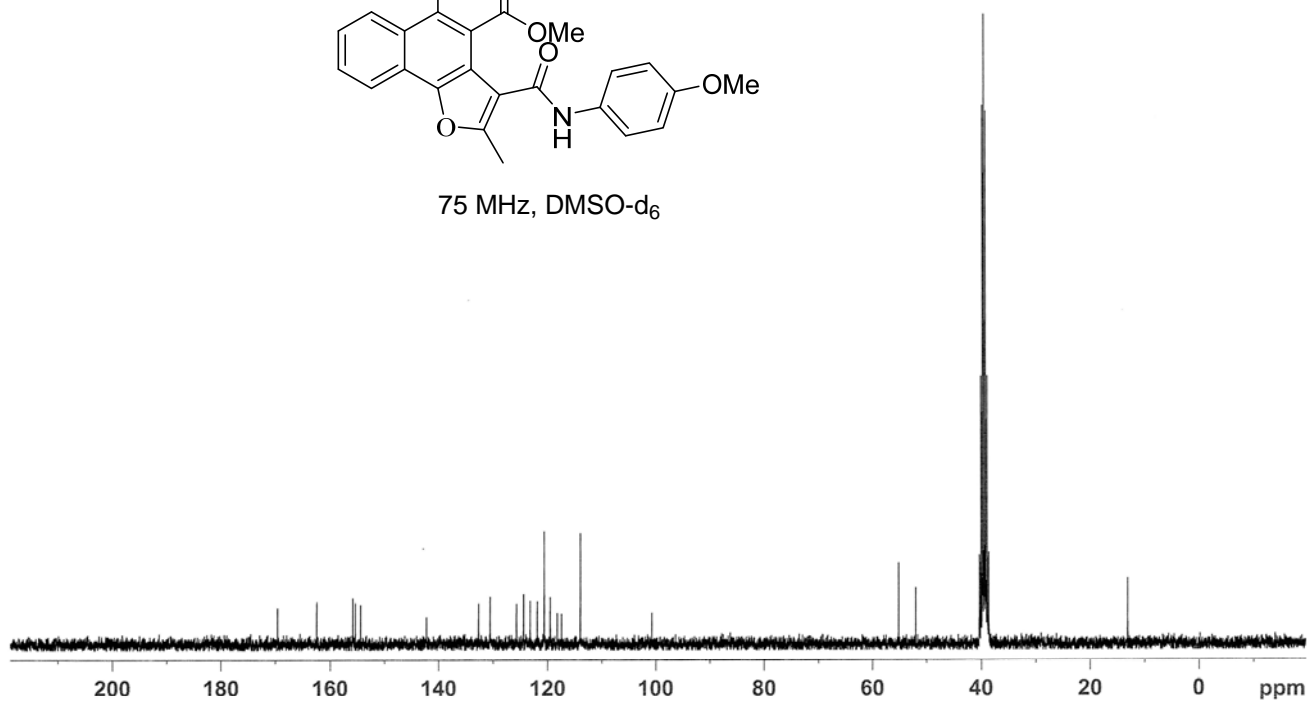

### Mass Spectrum of Compound 10

[ Mass Spectrum ]  
 Data : x9-4-C23H21NO6 Date : 04-Nov-2013 14:06  
 Sample : -  
 Note : -  
 Inlet : Direct Ion Mode : EI+  
 Spectrum Type : Normal Ion [EF-Linear]  
 RT : 1.58 min Scan# : (32,33)  
 BP : m/z 430.0706 Int. : 94.82  
 Output m/z range : 377.0000 to 437.0000 Cut Level : 0.00 %

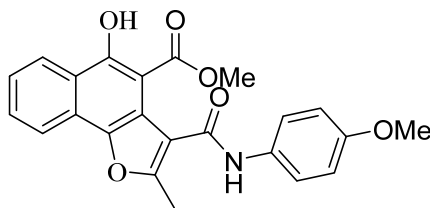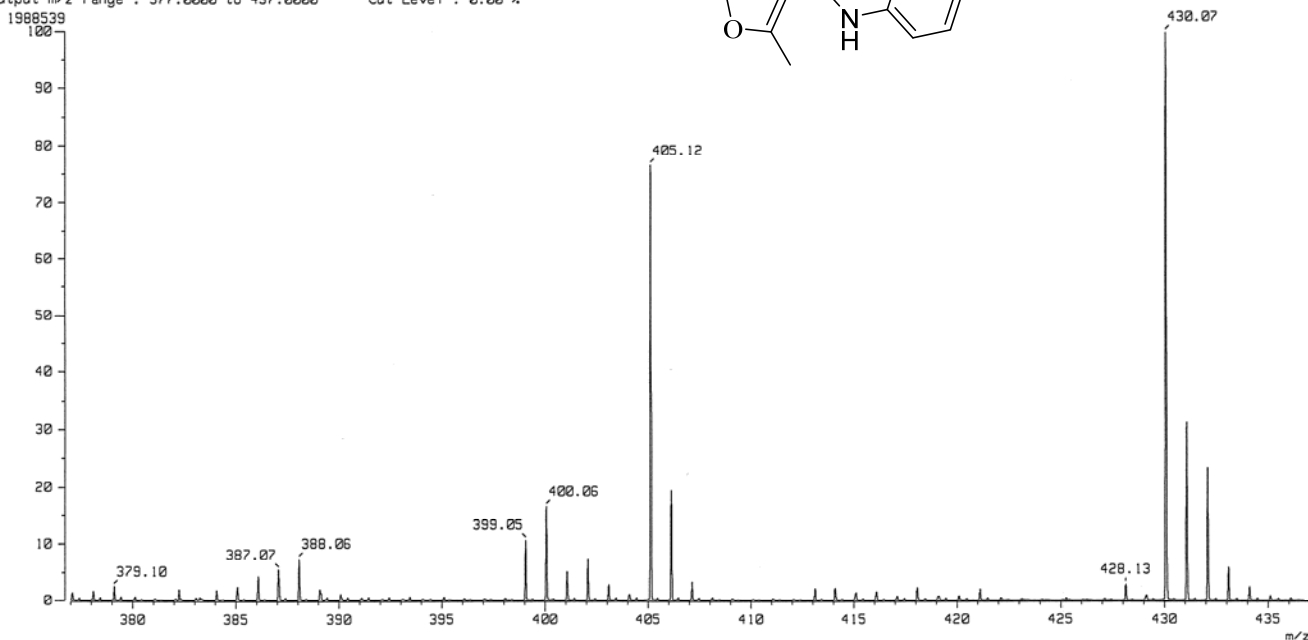

### [ Elemental Composition ]

Data : x9-4-C23H21NO6 Date : 04-Nov-2013 14:06  
 Sample : -  
 Note : -  
 Inlet : Direct Ion Mode : EI+  
 RT : 1.58 min Scan# : (32,33)  
 Elements : C 23/0, H 21/0, N 1/0, O 6/0  
 Mass Tolerance : 1000ppm, 1mmu if m/z < 1, 3mmu if m/z > 3  
 Unsaturation (U.S.) : -0.5 - 100.0

Page: 1

| Observed m/z | Int%  | Err [ppm / mmu] | U.S. Composition     |
|--------------|-------|-----------------|----------------------|
| 399.0516     | 10.7  |                 |                      |
| 400.0596     | 16.6  |                 |                      |
| 405.1215     | 76.6  | +0.5 / +0.2     | 15.0 C 23 H 19 N O 6 |
| 406.1235     | 19.5  |                 |                      |
| 430.0706     | 100.0 |                 |                      |
| 431.0744     | 31.4  |                 |                      |
| 432.0840     | 23.4  |                 |                      |

<sup>1</sup>H NMR of Compound 11

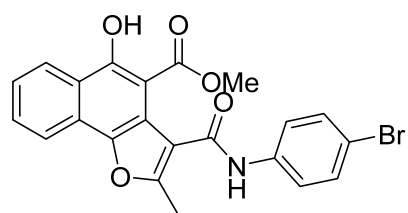

300 MHz, DMSO-d<sub>6</sub>

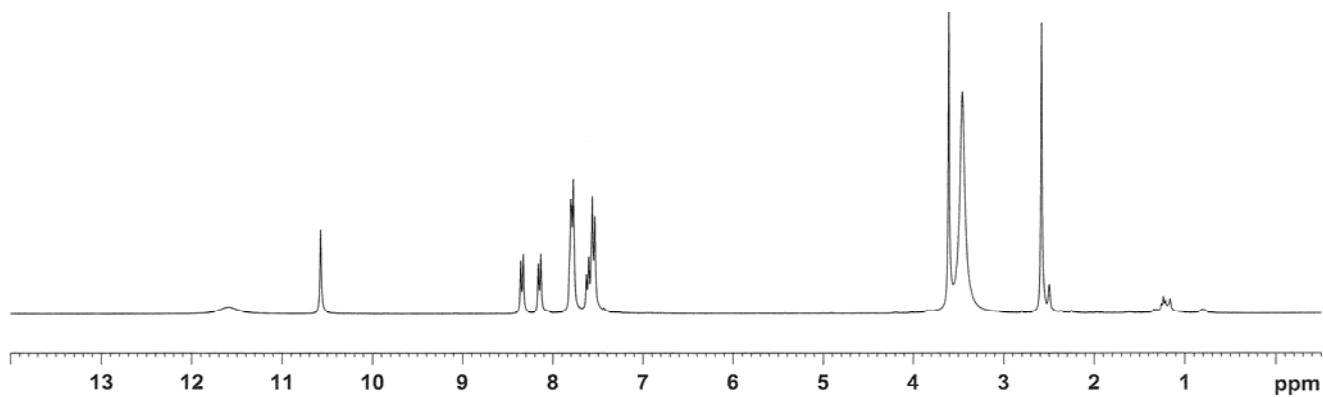

<sup>13</sup>C NMR of Compound 11

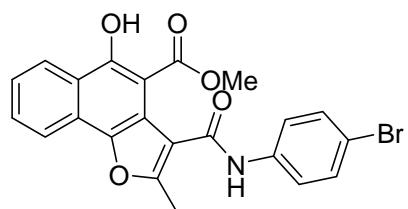

75 MHz, DMSO-d<sub>6</sub>

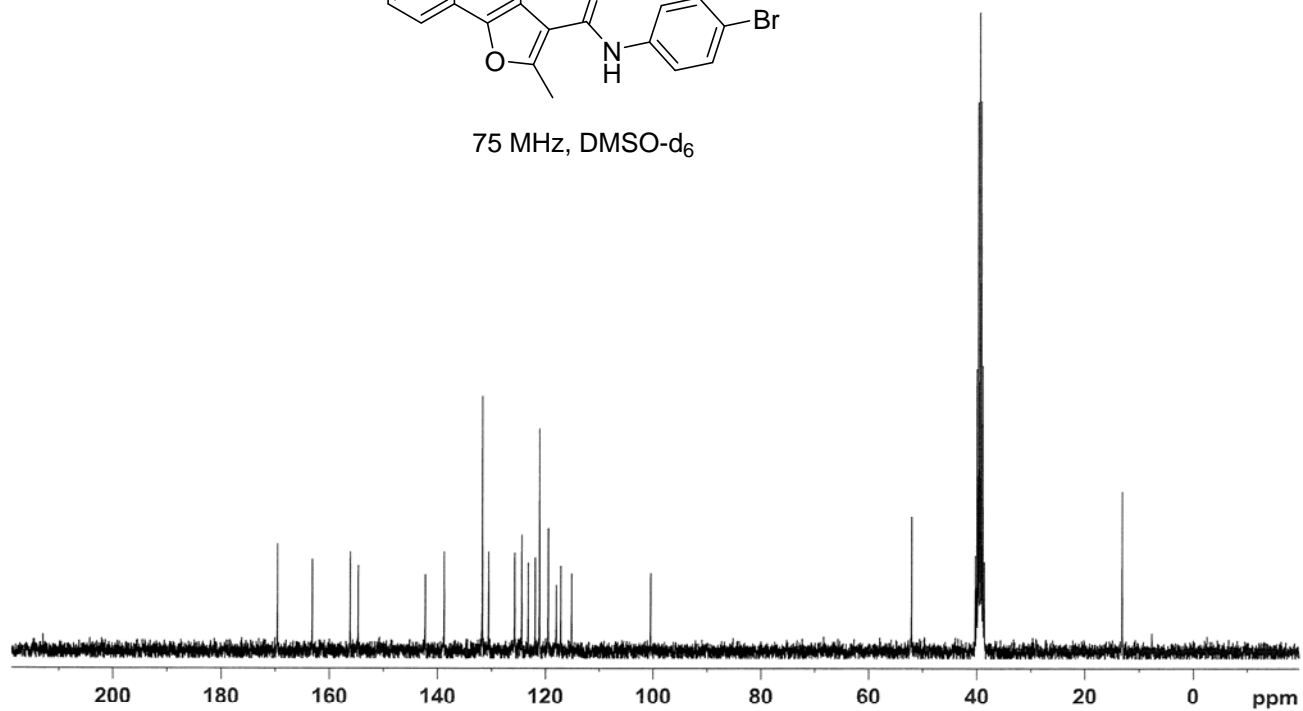

[ Mass Spectrum ]  
 Data : x9-5-C22H18BrNO5      Date : 04-Nov-2013 14:13  
 Sample : -  
 Note : -  
 Inlet : Direct      Ion Mode : EI+  
 Spectrum Type : Normal Ion [EF-Linear]  
 RT : 1.53 min      Scan# : (31,32)  
 BP : m/z 455.0211      Int. : 39.97  
 Output m/z range : 425.0000 to 485.0000      Cut Level : 0.00 %

Mass Spectrum of Compound 11

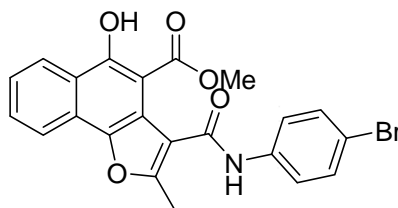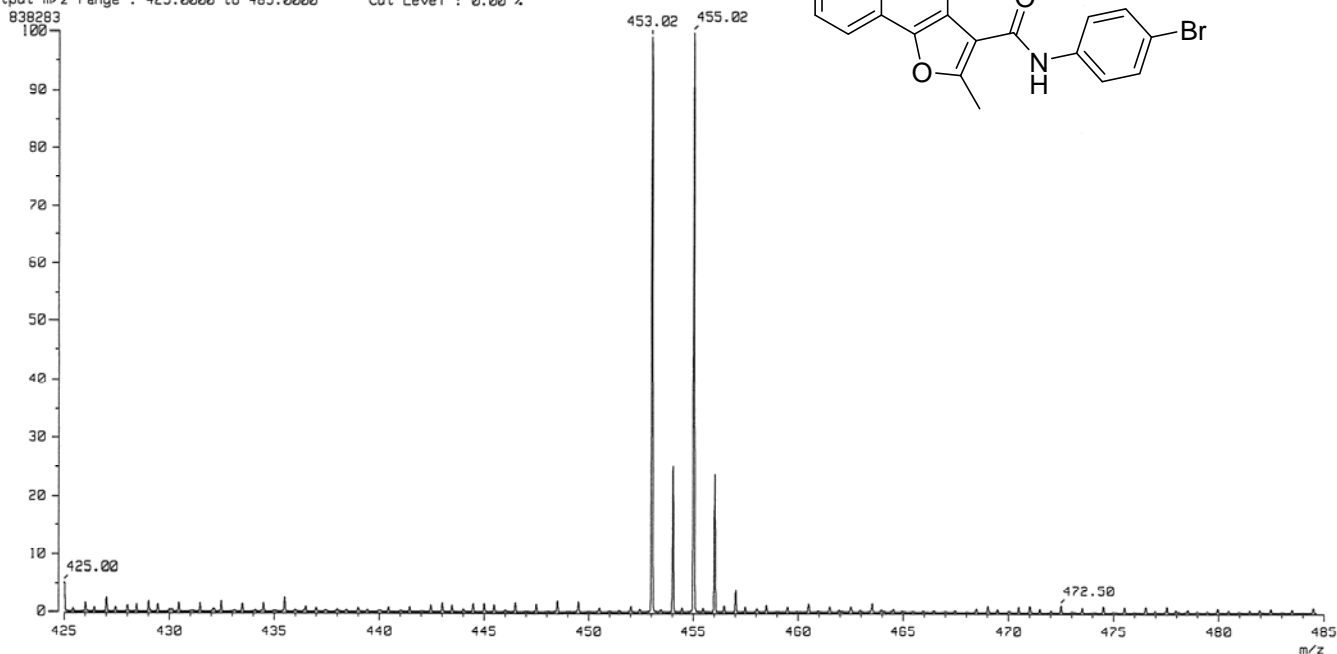

[ Elemental Composition ]

Data : x9-5-C22H18BrNO5      Date : 04-Nov-2013 14:13  
 Sample : -  
 Note : -  
 Inlet : Direct      Ion Mode : EI+  
 RT : 1.53 min      Scan#: (31,32)  
 Elements : C 22/0, H 18/0, Br 1/0, N 1/0, O 5/0  
 Mass Tolerance : 1mmu  
 Unsaturation (U.S.) : -0.5 - 100.0

| Observed m/z | Int%  | Err [ppm / mmu] | U.S. Composition        |
|--------------|-------|-----------------|-------------------------|
| 453.0214     | 99.3  | +0.4 / +0.2     | 15.0 C 22 H 16 Br N O 5 |
| 454.0277     | 25.2  |                 |                         |
| 455.0211     | 100.0 |                 |                         |
| 456.0230     | 23.9  |                 |                         |

<sup>1</sup>H NMR of Compound 12

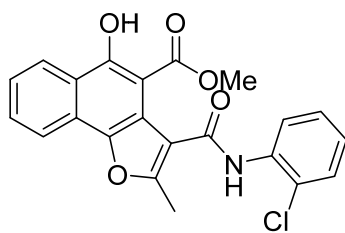

300 MHz, DMSO-d<sub>6</sub>

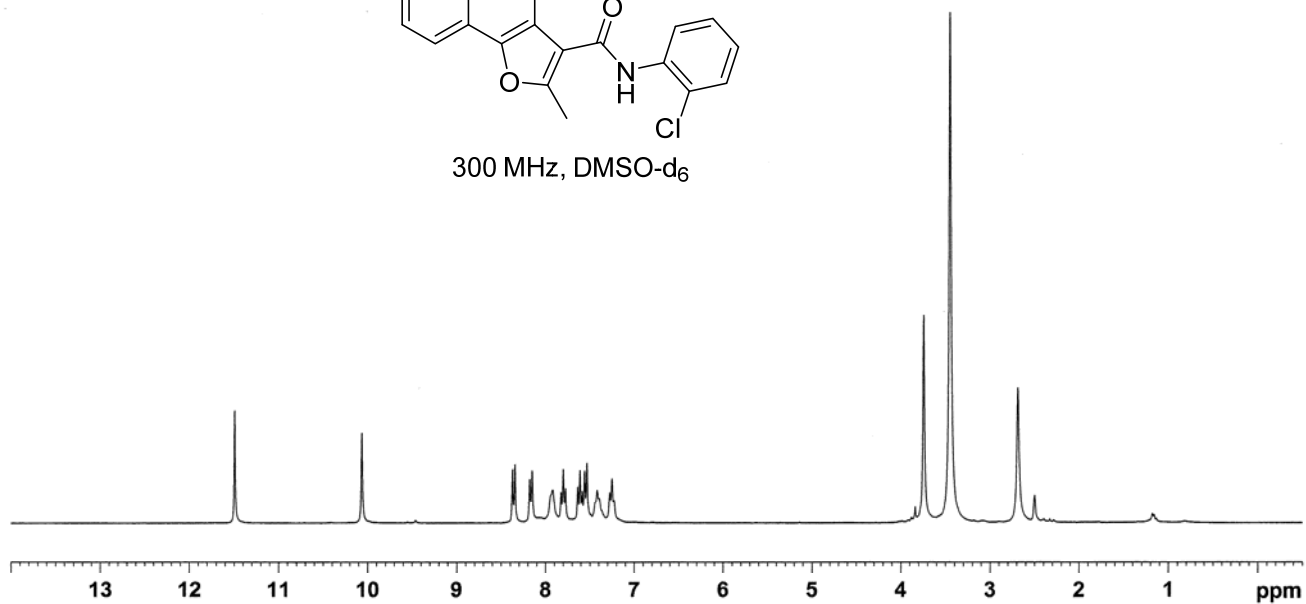

<sup>13</sup>C NMR of Compound 12

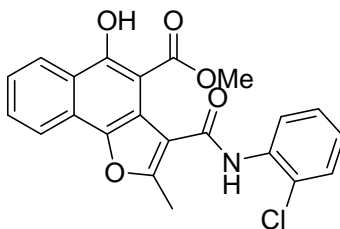

75 MHz, DMSO-d<sub>6</sub>

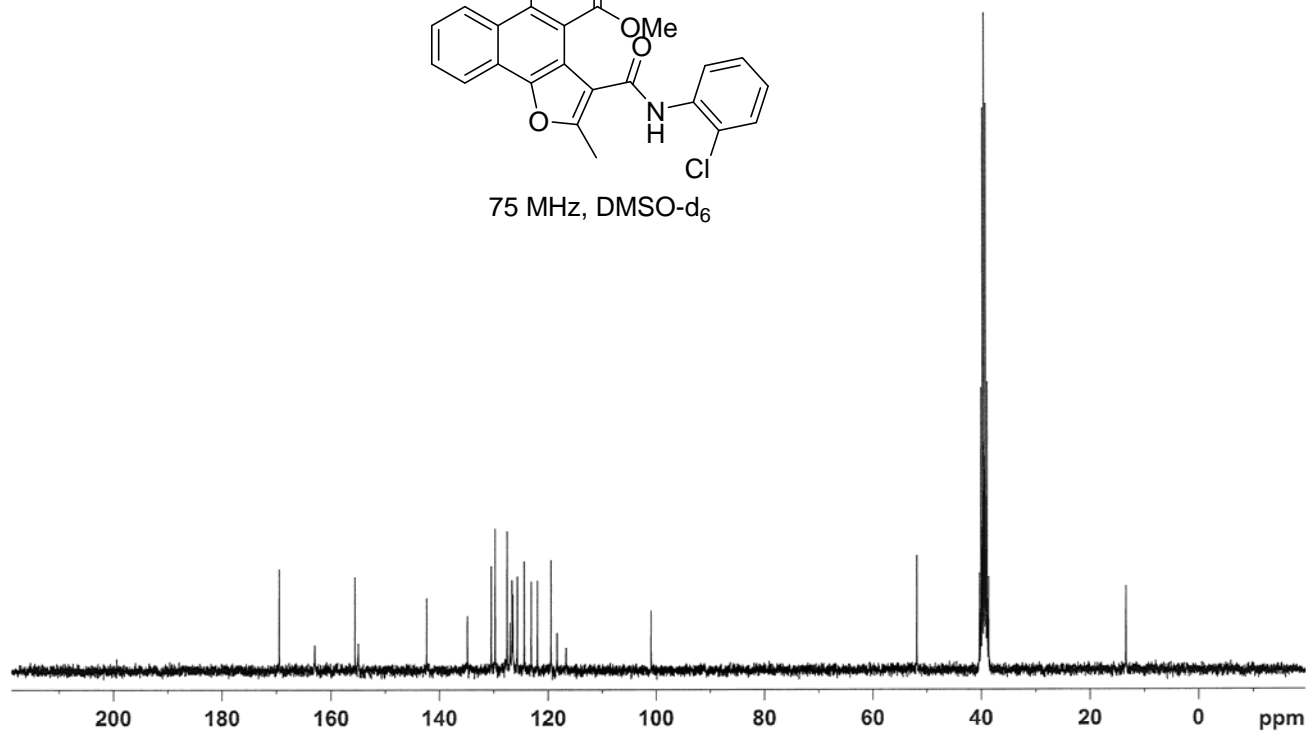

[ Mass Spectrum ]  
 Data : x9-6-C22H20ClNO5      Date : 04-Nov-2013 14:18  
 Sample : -  
 Note : -  
 Inlet : Direct      Ion Mode : EI+  
 Spectrum Type : Normal Ion [EF-Linear]  
 RT : 1.08 min      Scan# : (22,23)  
 BP : m/z 409.0716      Int. : 18.76  
 Output m/z range : 383.0000 to 443.0000      Cut Level : 0.00 %

Mass Spectrum of Compound 12

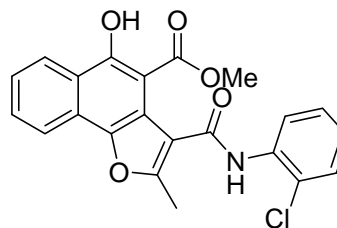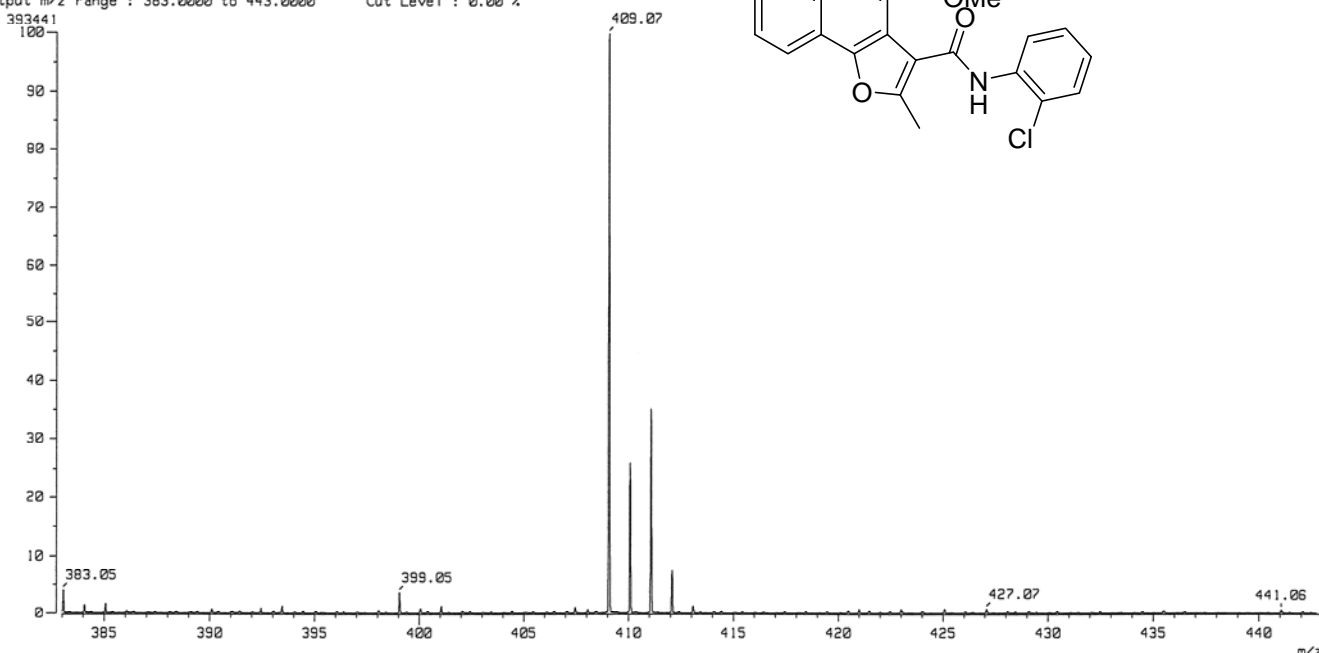

[ Elemental Composition ]

Data : x9-6-C22H20ClNO5      Date : 04-Nov-2013 14:18  
 Sample : -  
 Note : -  
 Inlet : Direct      Ion Mode : EI+  
 RT : 1.08 min      Scan# : (22,23)  
 Elements : C 22/0, H 20/0, Cl 1/0, N 1/0, O 5/0  
 Mass Tolerance : 1000ppm, 1mmu if m/z < 1, 3mmu if m/z > 3  
 Unsaturation (U.S.) : -0.5 - 100.0

| Observed m/z | Int%  | Err [ppm / mmu] | U.S. Composition        |
|--------------|-------|-----------------|-------------------------|
| 409.0716     | 100.0 | -0.3 / -0.1     | 15.0 C 22 H 16 Cl N O 5 |
| 410.745      | 26.0  |                 |                         |
| 411.0692     | 35.3  |                 |                         |

<sup>1</sup>H NMR of Compound 13

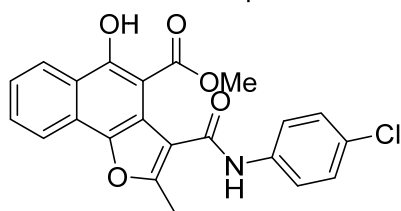

300 MHz, DMSO-d<sub>6</sub>

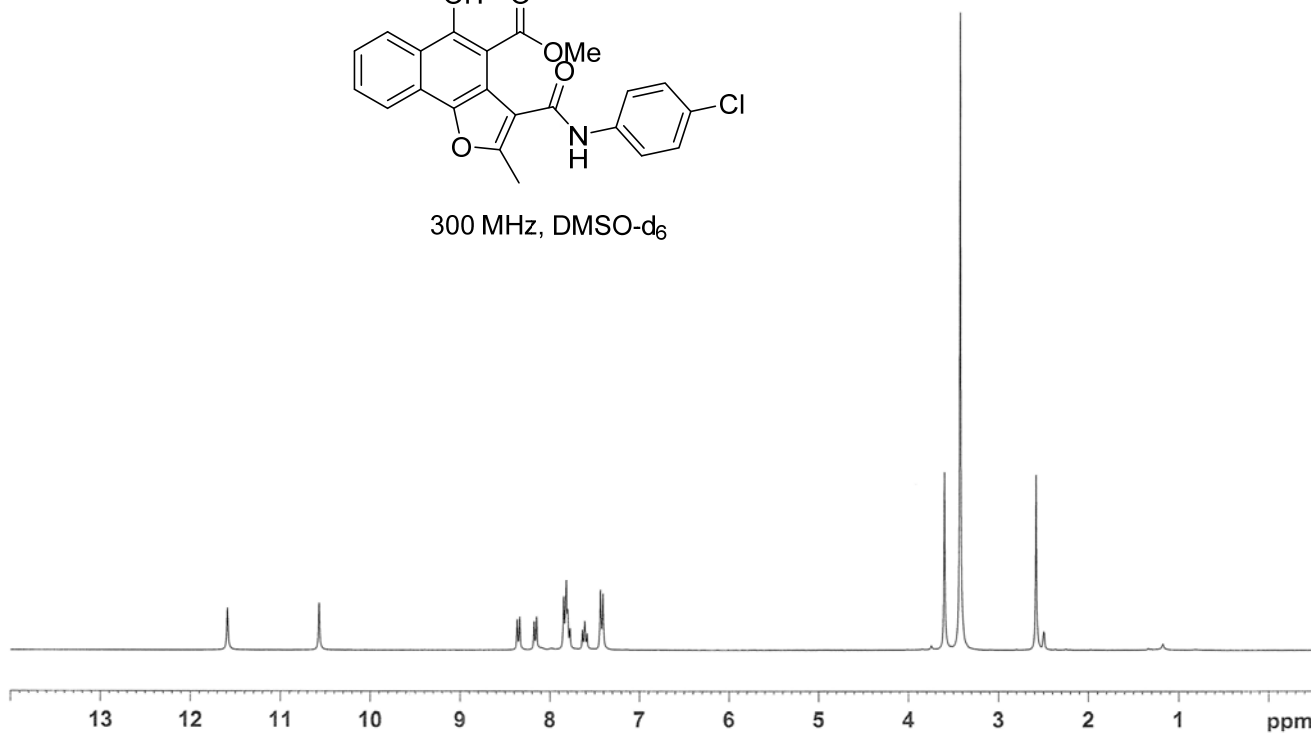

<sup>13</sup>C NMR of Compound 13

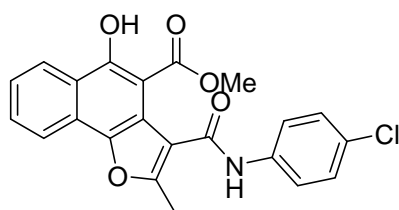

75 MHz, DMSO-d<sub>6</sub>

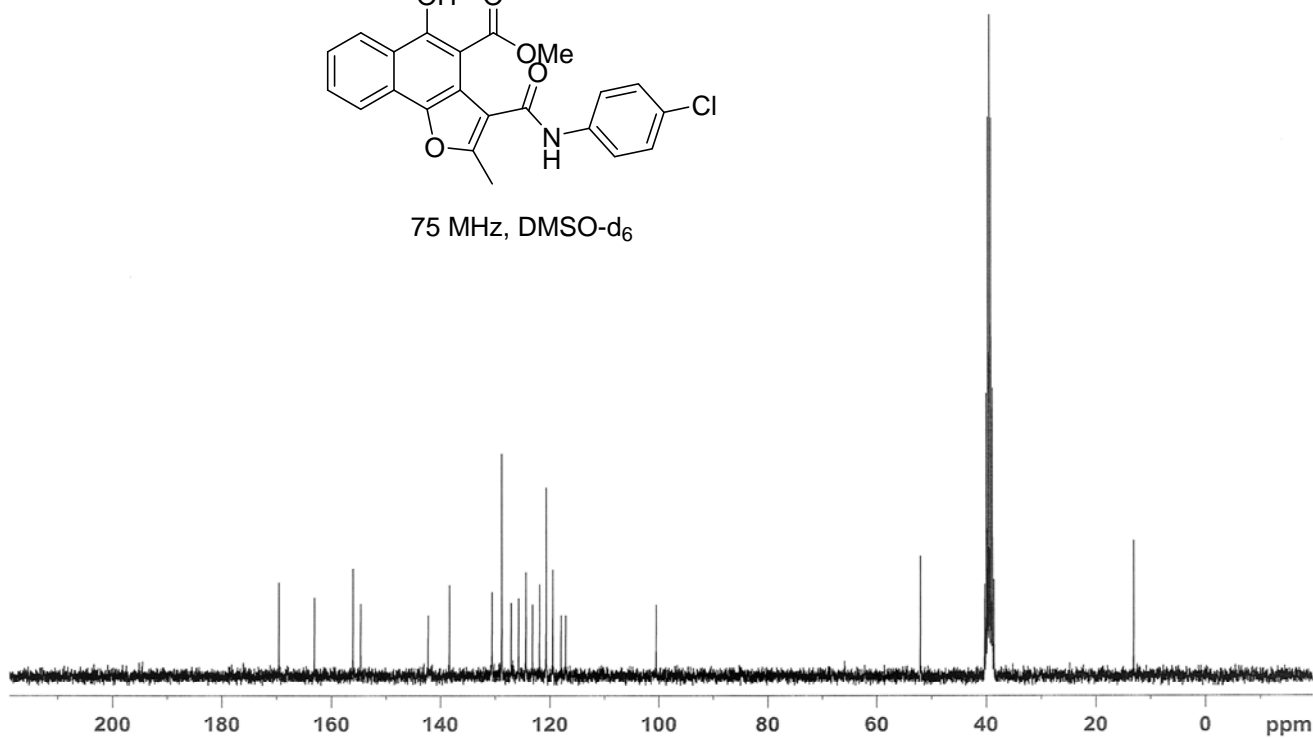



[ Mass Spectrum ]  
 Date : 04-Nov-2013 14:22  
 Sample : -  
 Note : -  
 Inlet : Direct Ion Mode : EI+  
 Spectrum Type : Normal Ion [EF-Linear]  
 RT : 0.93 min Scan# : (19,20)  
 BP : m/z 409.0717 Int. : 19.66  
 Output m/z range : 381.0000 to 441.0000 Cut Level : 0.00 %

Mass Spectrum of Compound 13

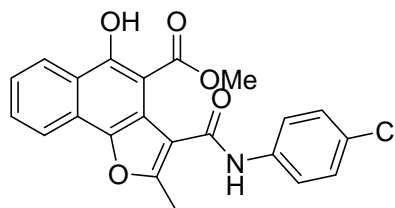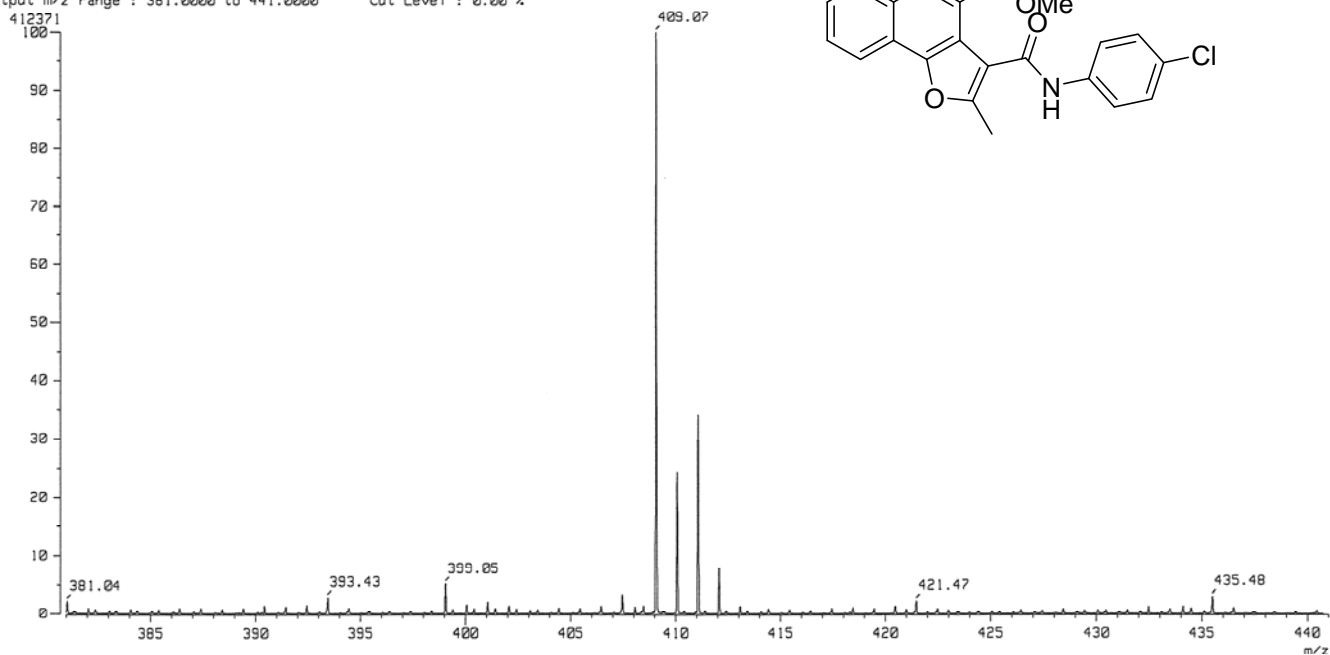

[ Elemental Composition ]

Data : x9-7-C22H18ClNO5 Date : 04-Nov-2013 14:22  
 Sample : -  
 Note : -  
 Inlet : Direct Ion Mode : EI+  
 RT : 0.93 min Scan# : (19,20)  
 Elements : C 22/0, H 18/0, Cl 1/0, N 1/0, O 5/0  
 Mass Tolerance : 1000ppm, 1mmu if m/z < 1, 3mmu if m/z > 3  
 Unsaturation (U.S.) : -0.5 - 100.0

| Observed m/z | Int%  | Err [ppm / mmu] | U.S. | Composition        |
|--------------|-------|-----------------|------|--------------------|
| 409.0717     | 100.0 | +0.0 / +0.0     | 15.0 | C 22 H 16 Cl N O 5 |
| 410.0747     | 24.4  |                 |      |                    |
| 411.0691     | 34.2  |                 |      |                    |

<sup>1</sup>H NMR of Compound 14

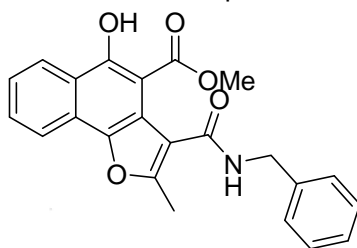

300 MHz, CDCl<sub>3</sub> + DMSO-d<sub>6</sub>

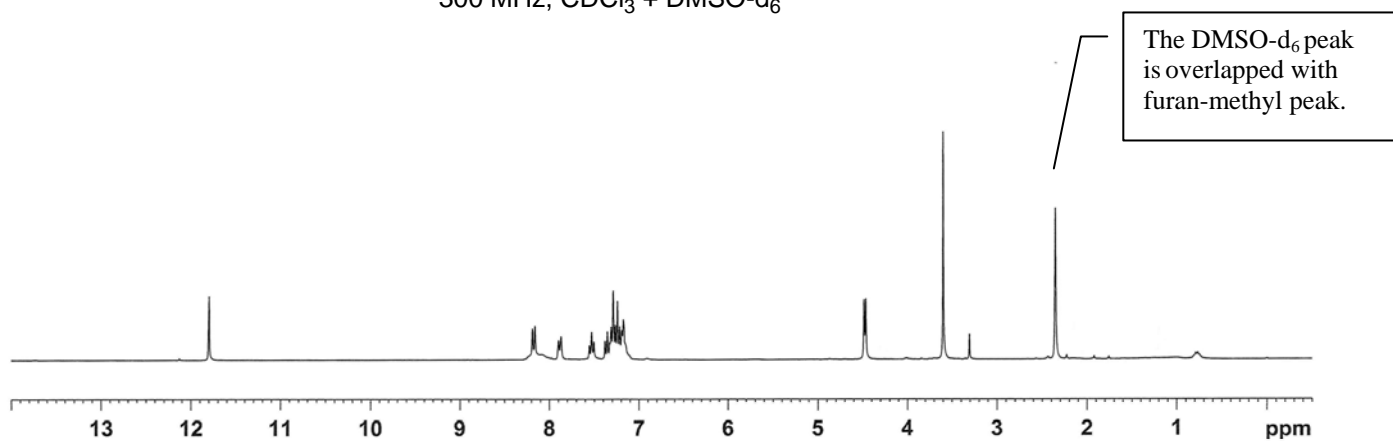

<sup>13</sup>C NMR of Compound 14

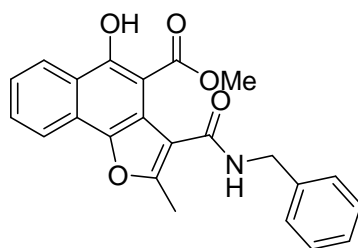

75 MHz, CDCl<sub>3</sub> + DMSO-d<sub>6</sub>

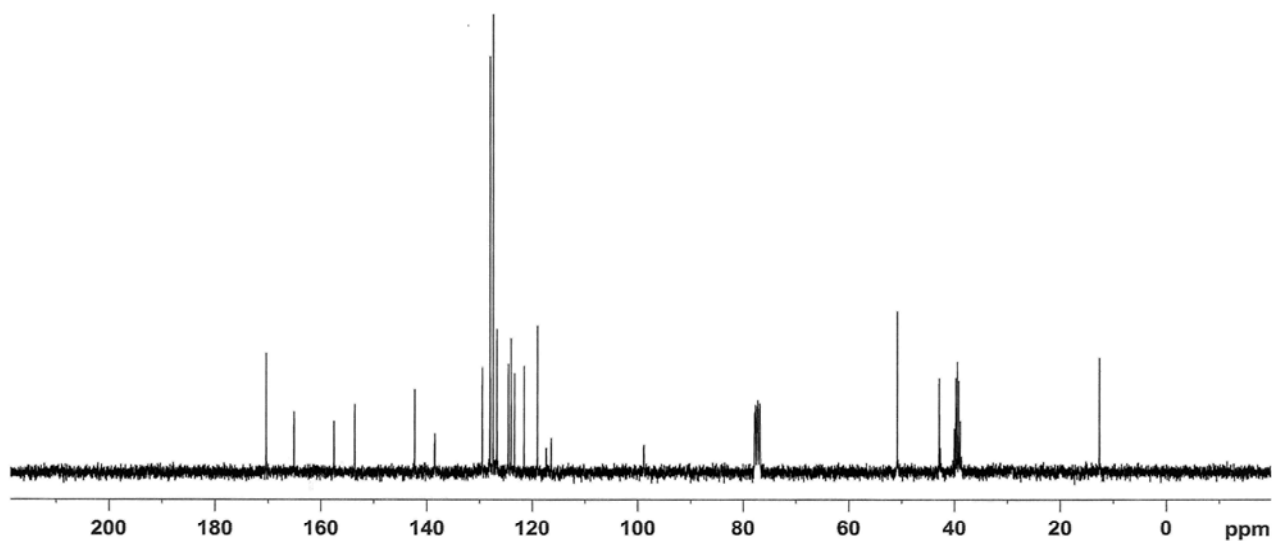

[ Mass Spectrum ]  
 Date : 04-Nov-2013 14:26  
 Sample : -  
 Note : -  
 Inlet : Direct Ion Mode : EI+  
 Spectrum Type : Normal Ion [EF-Linear]  
 RT : 1.33 min Scan# : (27,28)  
 BP : m/z 389.1262 Int. : 46.12  
 Output m/z range : 361.0000 to 421.0000 Cut Level : 0.00 %

Mass Spectrum of Compound 14

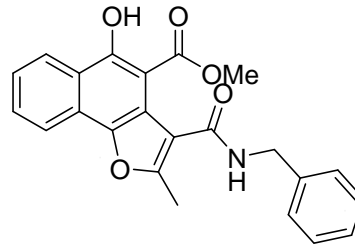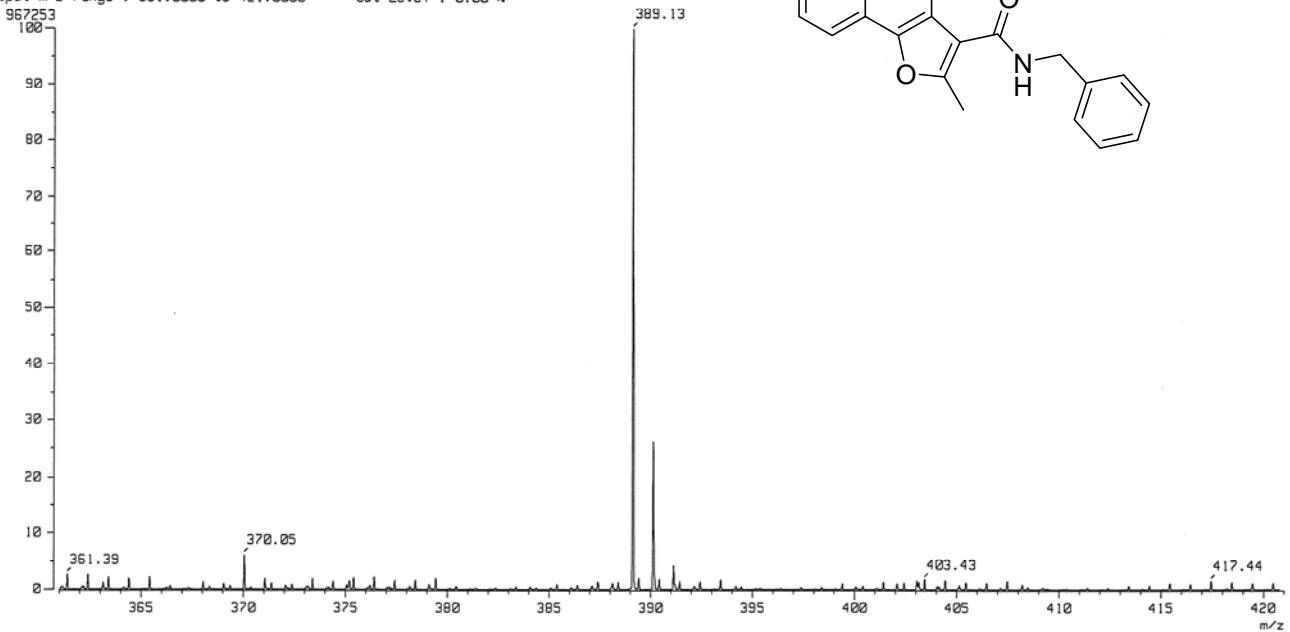

[ Elemental Composition ]

Data : x9-8-C23H21NO5 Date : 04-Nov-2013 14:26  
 Sample : -  
 Note : -  
 Inlet : Direct Ion Mode : EI+  
 RT : 1.33 min Scan# : (27,28)  
 Elements : C 23/0, H 21/0, N 1/0, O 5/0  
 Mass Tolerance : 1000ppm, 1mmu if m/z < 1, 3mmu if m/z > 3  
 Unsaturation (U.S.) : -0.5 - 100.0

| Observed m/z | Int%  | Err [ppm / mmu] | U.S. | Composition     |
|--------------|-------|-----------------|------|-----------------|
| 389.1262     | 100.0 | -0.4 / -0.2     | 15.0 | C 23 H 19 N O 5 |
| 390.1306     | 26.3  |                 |      |                 |

<sup>1</sup>H NMR of Compound 15

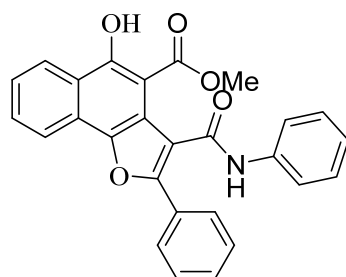

300 MHz, DMSO-d<sub>6</sub>

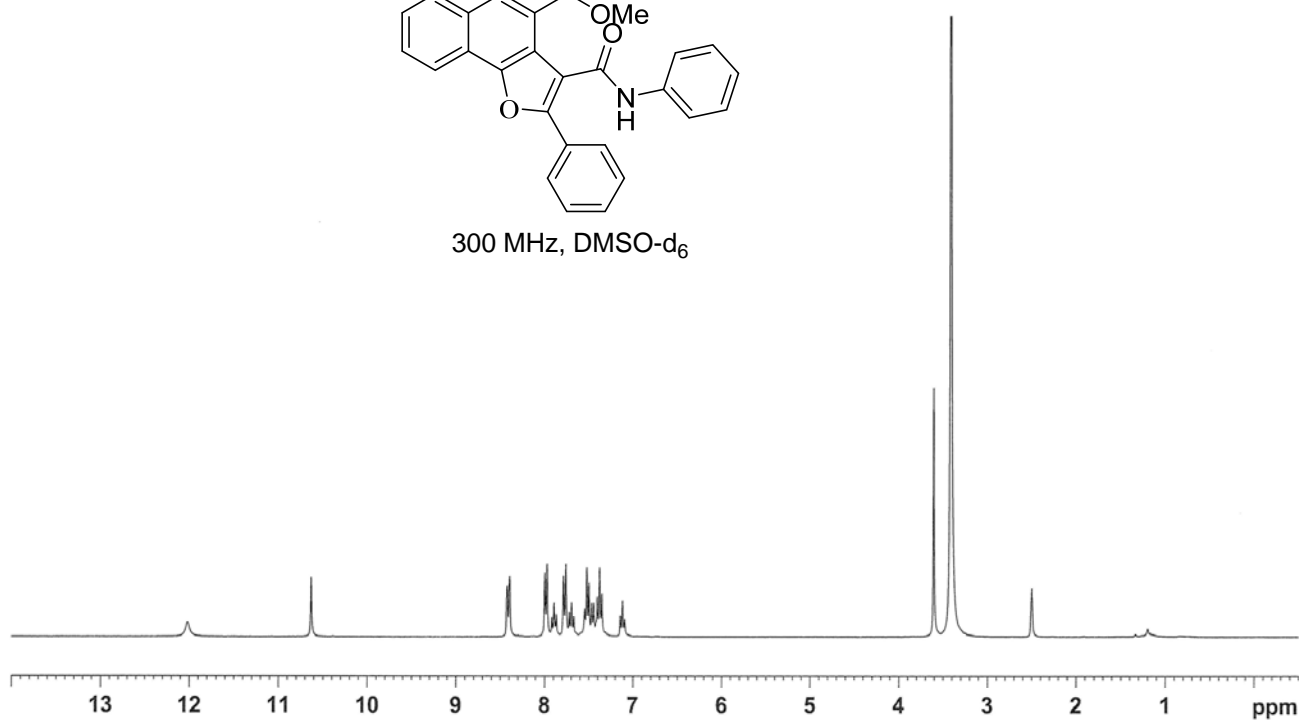

<sup>13</sup>C NMR of Compound 15

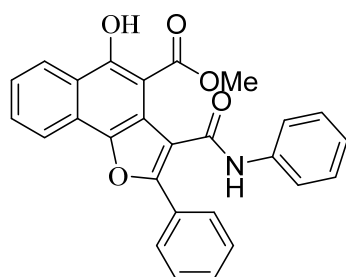

75 MHz, DMSO-d<sub>6</sub>

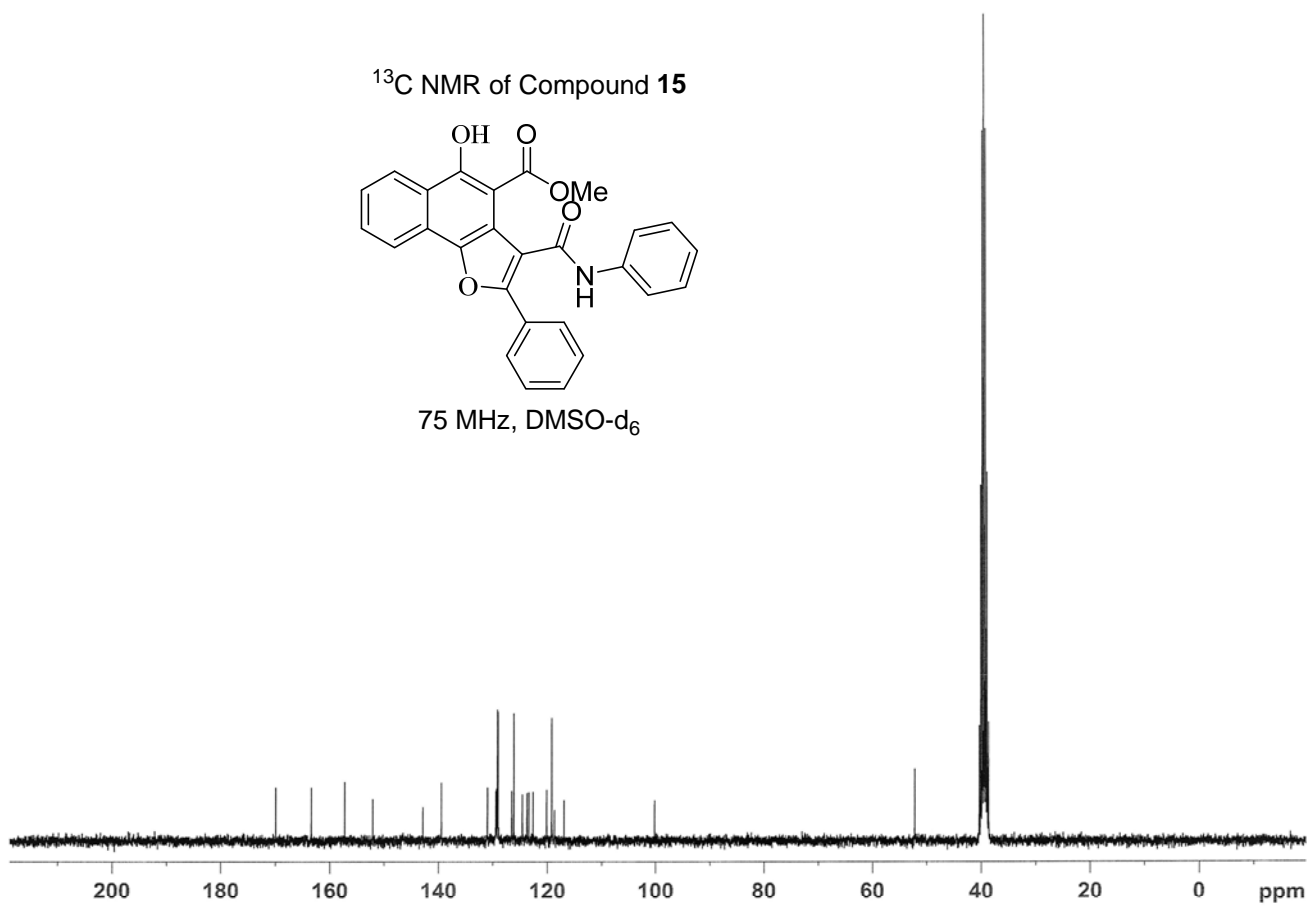

[ Mass Spectrum ]  
 Data : x9-9-C27H21NO5 Date : 04-Nov-2013 14:31  
 Sample : -  
 Note : -  
 Inlet : Direct Ion Mode : EI+  
 Spectrum Type : Normal Ion [EF-Linear]  
 RT : 1.08 min Scan# : (22,23)  
 BP : m/z 437.1266 Int. : 15.47  
 Output m/z range : 409.0000 to 469.0000 Cut Level : 0.00 %

Mass Spectrum of Compound 15

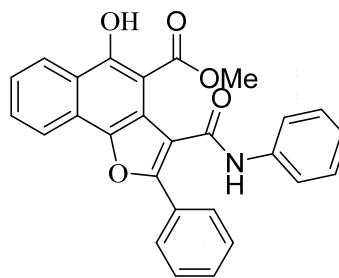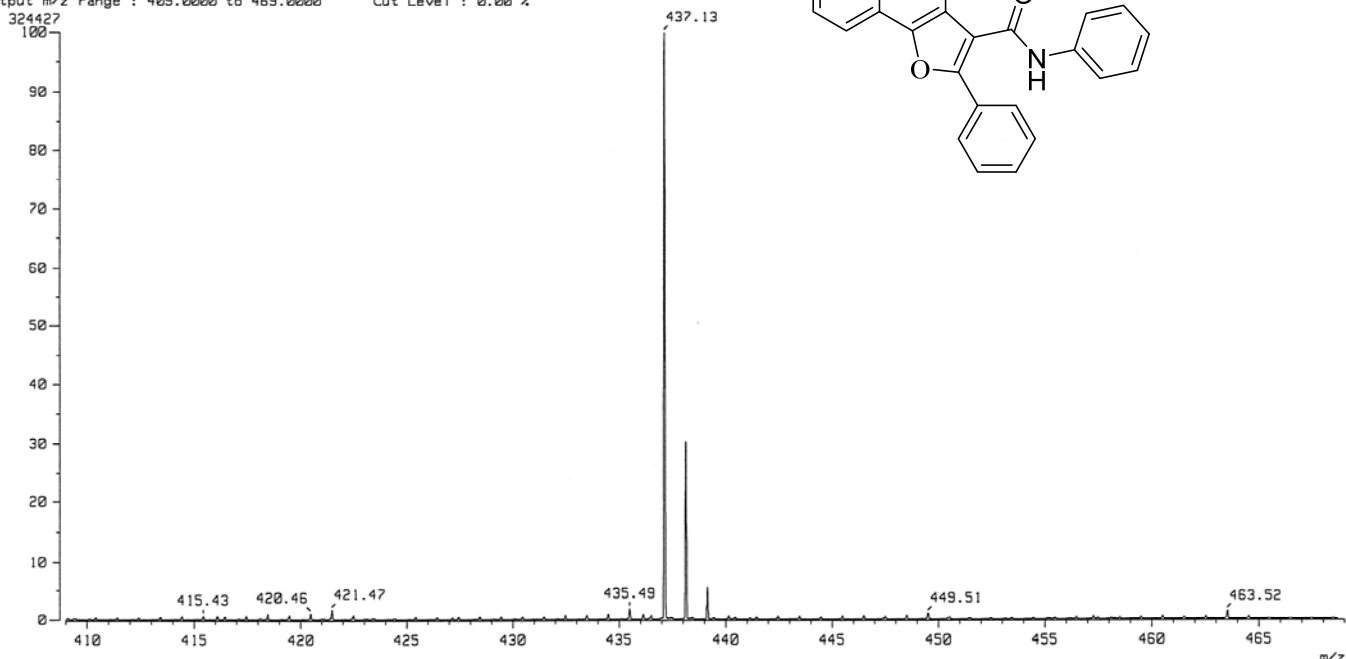

[ Elemental Composition ]

Data : x9-9-C27H21NO5 Date : 04-Nov-2013 14:31  
 Sample : -  
 Note : -  
 Inlet : Direct Ion Mode : EI+  
 RT : 1.08 min Scan#: (22,23)  
 Elements : C 27/0, H 21/0, N 1/0, O 5/0  
 Mass Tolerance : 1000ppm, 1mmu if m/z < 1, 2mmu if m/z > 2  
 Unsaturation (U.S.) : -0.5 - 100.0

| Observed m/z | Int%  | Err [ppm / mmu] | U.S. Composition     |
|--------------|-------|-----------------|----------------------|
| 437.1266     | 100.0 | +0.7 / +0.3     | 19.0 C 27 H 19 N O 5 |
| 438.1314     | 30.4  |                 |                      |

<sup>1</sup>H NMR of Compound 16

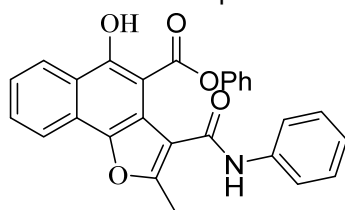

300 MHz, DMSO-d<sub>6</sub>

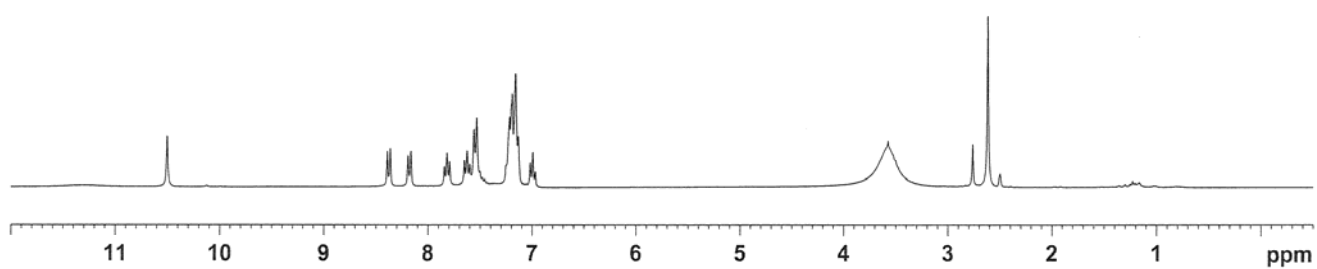

<sup>13</sup>C NMR of Compound 16

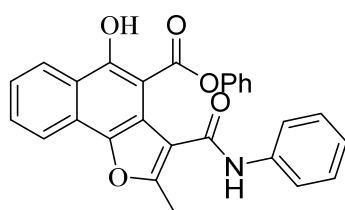

75 MHz, DMSO-d<sub>6</sub>

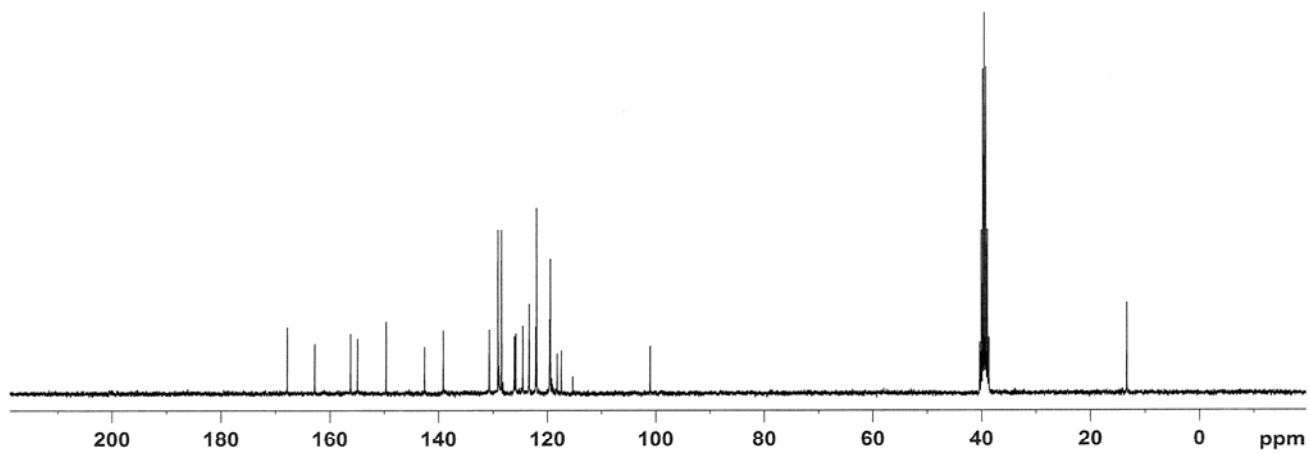

[ Mass Spectrum ]  
 Data : x9-10-C27H21NO5 Date : 04-Nov-2013 14:36  
 Sample : -  
 Note : -  
 Inlet : Direct Ion Mode : EI+  
 Spectrum Type : Normal Ion [EF-Linear]  
 RT : 1.28 min Scan# : (26,27)  
 BP : m/z 437.1261 Int. : 23.75  
 Output m/z range : 409.0000 to 469.0000 Cut Level : 0.00 %

Mass Spectrum of Compound 16

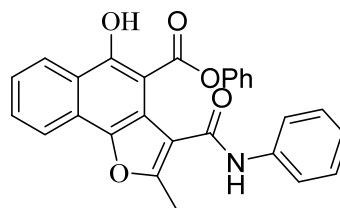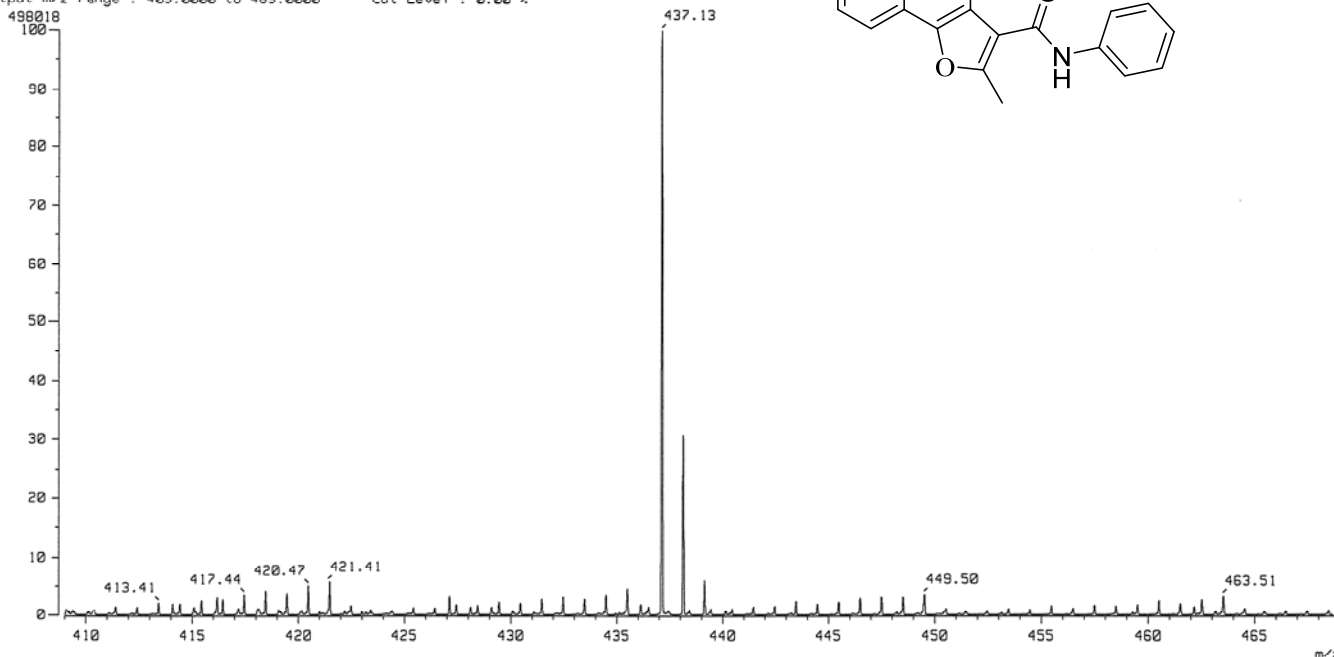

[ Elemental Composition ]

Data : x9-10-C27H21NO5 Date : 04-Nov-2013 14:36  
 Sample : -  
 Note : -  
 Inlet : Direct Ion Mode : EI+  
 RT : 1.28 min Scan#: (26,27)  
 Elements : C 27/0, H 21/0, N 1/0, O 5/0  
 Mass Tolerance : 1000ppm, 1mmu if m/z < 1, 3mmu if m/z > 3  
 Unsaturation (U.S.) : -0.5 - 100.0

| Observed m/z | Int%  | Err [ppm / mmu] | U.S. Composition     |
|--------------|-------|-----------------|----------------------|
| 437.1261     | 100.0 | -0.4 / -0.2     | 19.0 C 27 H 19 N O 5 |
| 438.1299     | 30.9  |                 |                      |

<sup>1</sup>H NMR of Compound 17

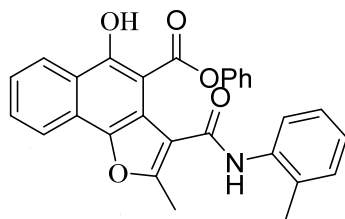

300 MHz, DMSO-d<sub>6</sub>

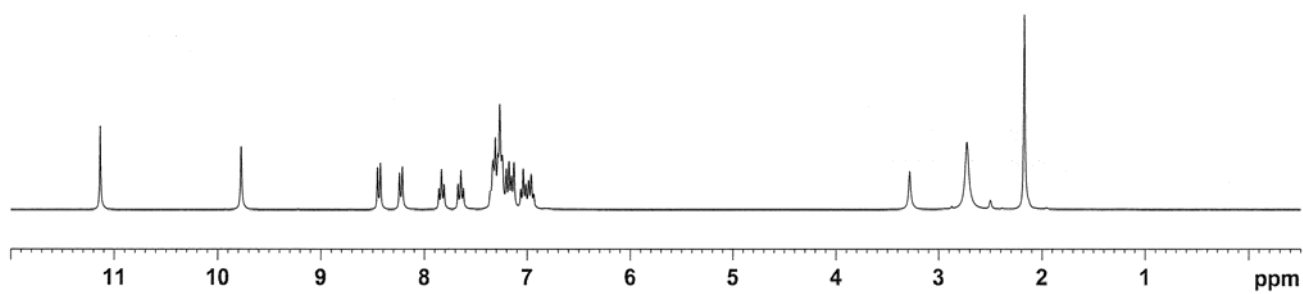

<sup>13</sup>C NMR of Compound 17

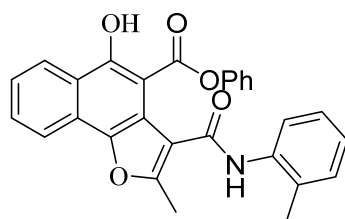

75 MHz, DMSO-d<sub>6</sub>

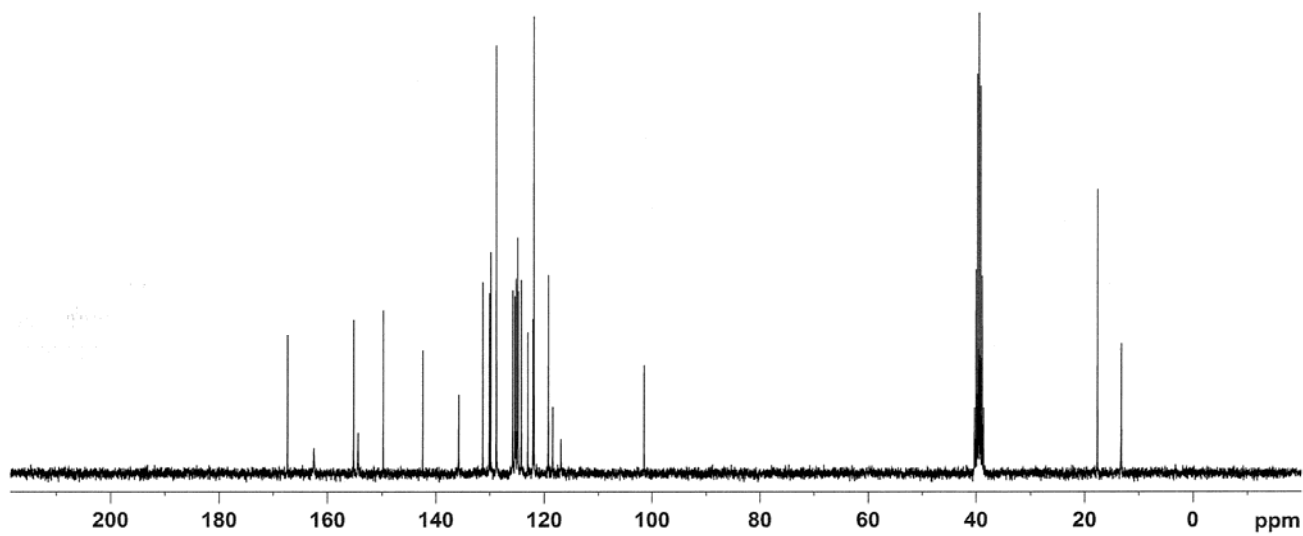



[ Mass Spectrum ]  
 Date : 04-Nov-2013 14:43  
 Sample : -  
 Note : -  
 Inlet : Direct Ion Mode : EI+  
 Spectrum Type : Normal Ion [EF-Linear]  
 RT : 1.13 min Scan# : (23,24)  
 BP : m/z 451.1417 Int. : 43.71  
 Output m/z range : 423.0000 to 483.0000 Cut Level : 0.00 %

Mass Spectrum of Compound 17

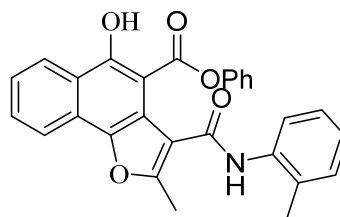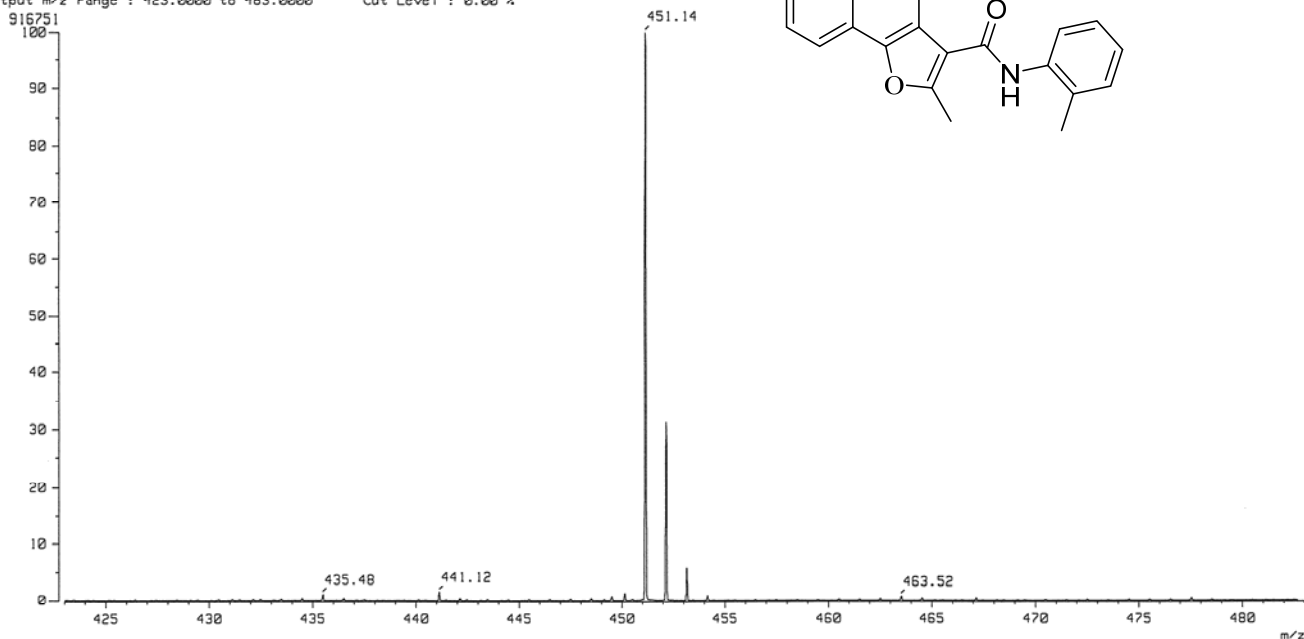

[ Elemental Composition ]

Data : x9-11-C28H23NO5 Date : 04-Nov-2013 14:43  
 Sample : -  
 Note : -  
 Inlet : Direct Ion Mode : EI+  
 RT : 1.13 min Scan# : (23,24)  
 Elements : C 28/0, H 23/0, N 1/0, O 5/0  
 Mass Tolerance : 1000ppm, 1mmu if m/z < 1, 3mmu if m/z > 3  
 Unsaturation (U.S.) : -0.5 - 100.0

| Observed m/z | Int%  | Err [ppm / mmu] | U.S. Composition     |
|--------------|-------|-----------------|----------------------|
| 451.1417     | 100.0 | -0.6 / -0.2     | 19.0 C 28 H 21 N O 5 |
| 452.1462     | 31.3  |                 |                      |

<sup>1</sup>H NMR of Compound **18**

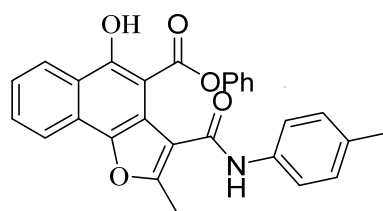

300 MHz, DMSO-d<sub>6</sub>

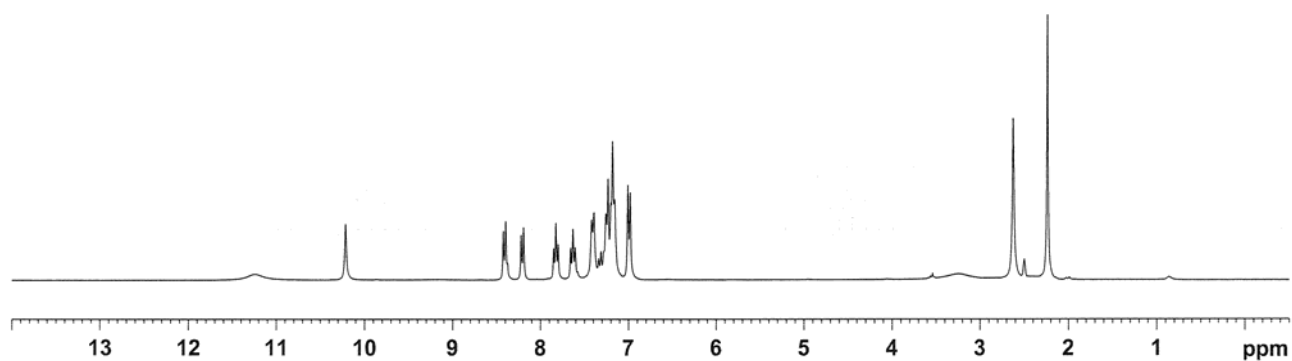

<sup>13</sup>C NMR of Compound **18**

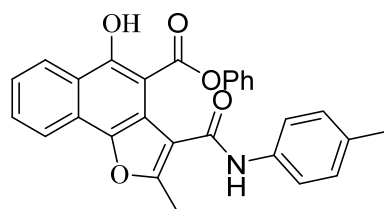

75 MHz, DMSO-d<sub>6</sub>

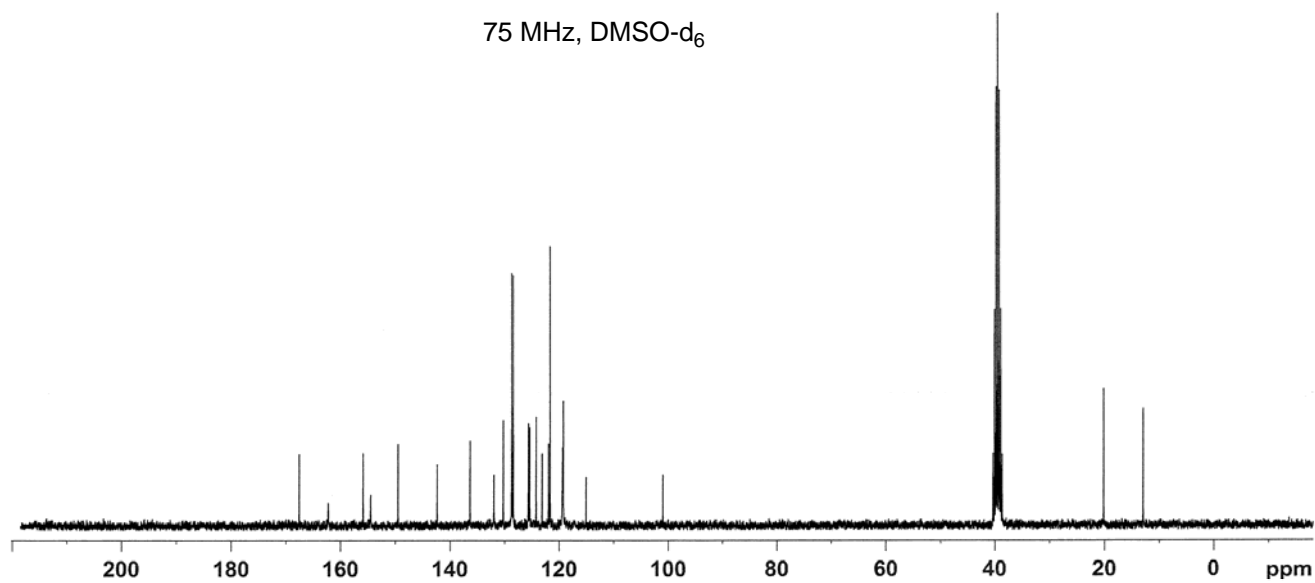

[ Mass Spectrum ]  
 Date : 04-Nov-2013 14:46  
 Sample : -  
 Note : -  
 Inlet : Direct Ion Mode : EI+  
 Spectrum Type : Normal Ion [EF-Linear]  
 RT : 1.63 min Scan# : (33,34)  
 BP : m/z 451.1422 Int. : 24.41  
 Output m/z range : 423.0000 to 483.0000 Cut Level : 0.00 %

Mass Spectrum of Compound 18

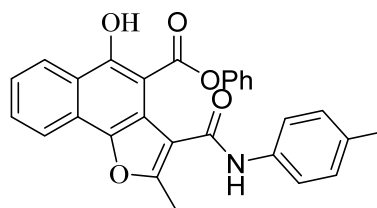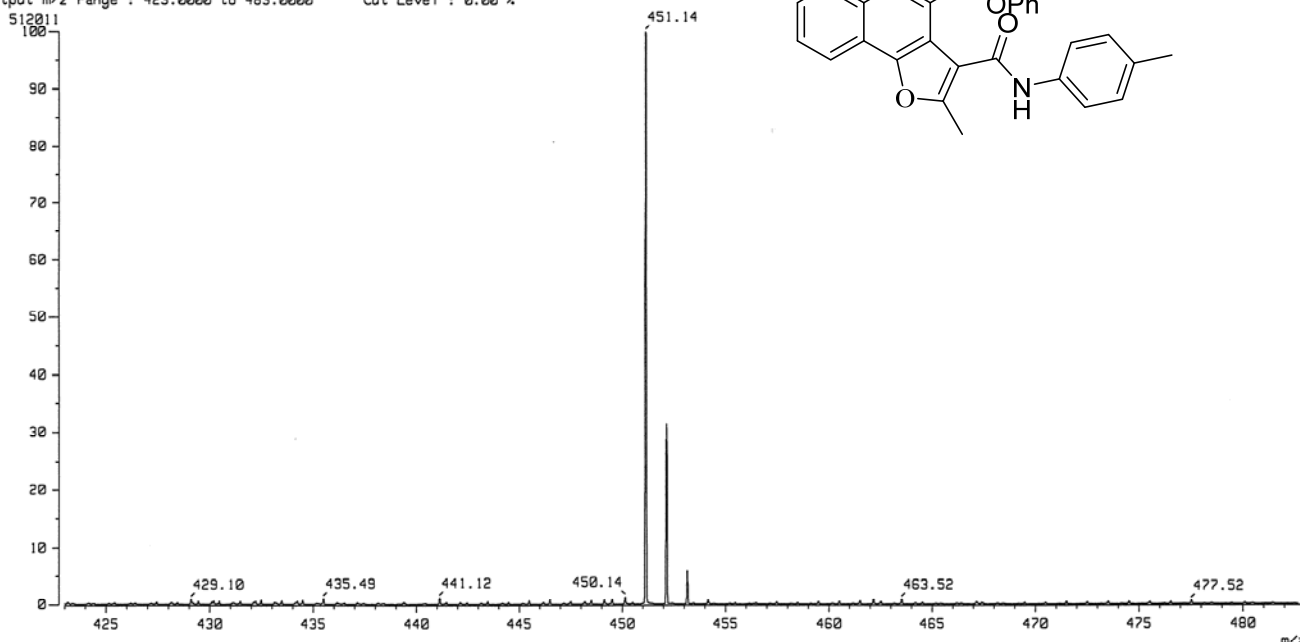

[ Elemental Composition ]

Data : x9-12-C28H23NO5 Date : 04-Nov-2013 14:46  
 Sample : -  
 Note : -  
 Inlet : Direct Ion Mode : EI+  
 RT : 1.63 min Scan# : (33,34)  
 Elements : C 28/0, H 23/0, N 1/0, O 5/0  
 Mass Tolerance : 1000ppm, 1mmu if m/z < 1, 3mmu if m/z > 3  
 Unsaturation (U.S.) : -0.5 - 100.0

| Observed m/z | Int%  | Err [ppm / mmu] | U.S. Composition     |
|--------------|-------|-----------------|----------------------|
| 451.1422     | 100.0 | +0.5 / +0.2     | 19.0 C 28 H 21 N O 5 |
| 452.1457     | 31.5  |                 |                      |

<sup>1</sup>H NMR of Compound 19

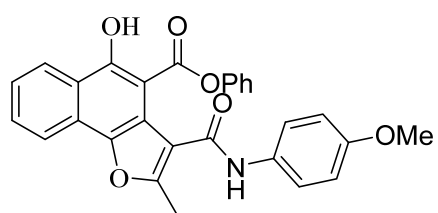

300 MHz, DMSO-d<sub>6</sub>

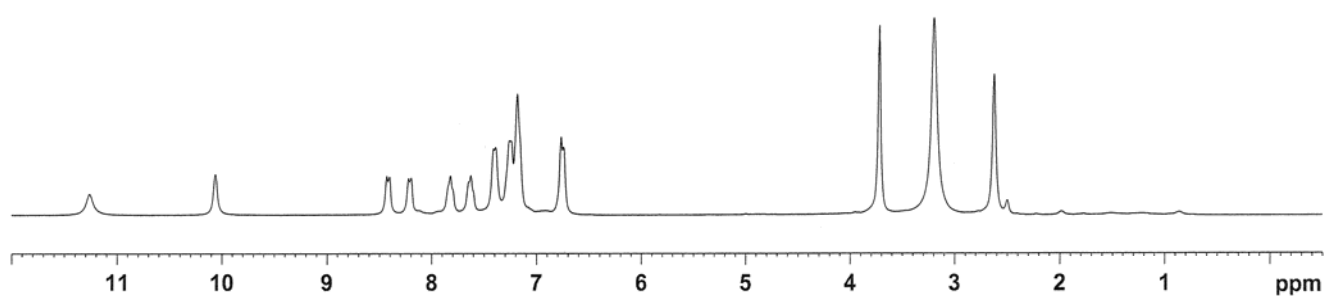

<sup>13</sup>C NMR of Compound 19

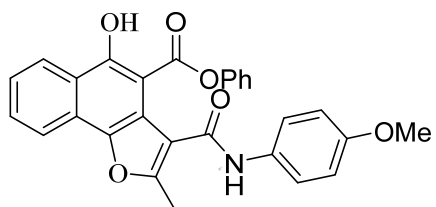

75 MHz, DMSO-d<sub>6</sub>

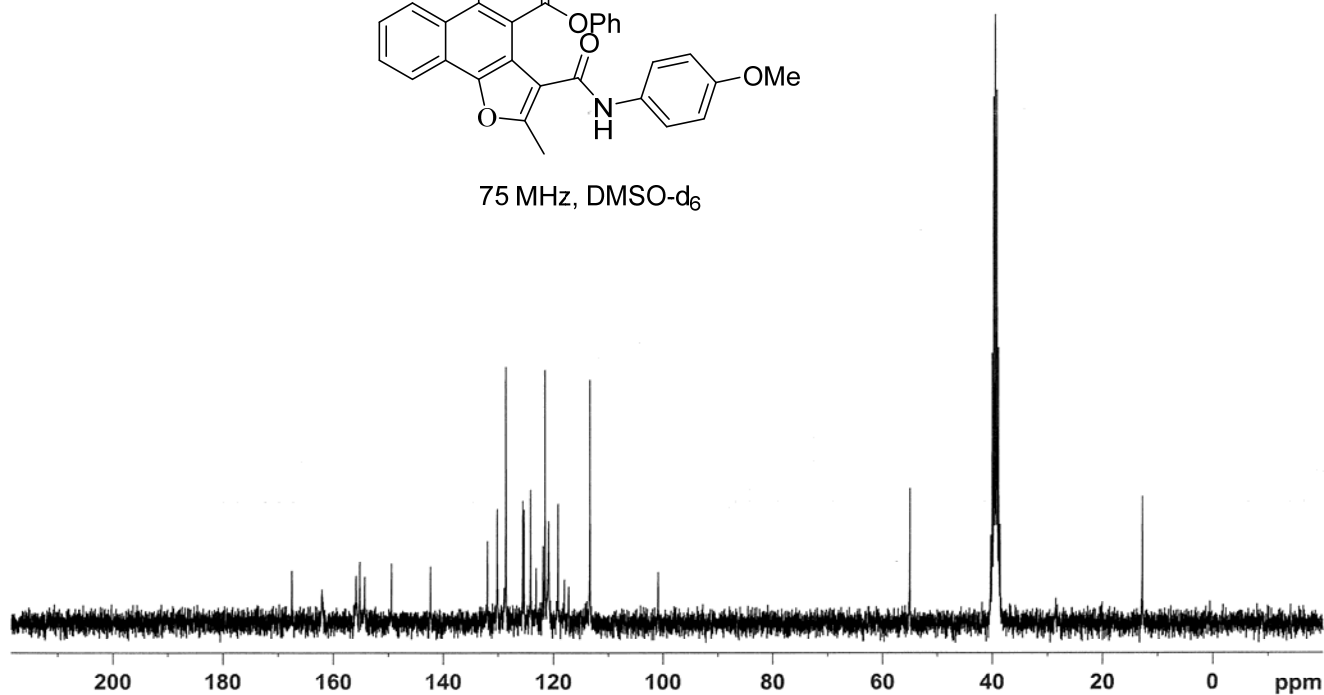

Mass Spectrum of Compound 19

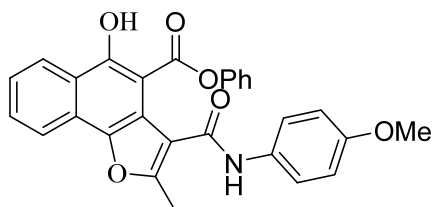

[ Mass Spectrum ]  
 Data : x9-13-C28H23NO6      Date : 04-Nov-2013 14:51  
 Sample : -  
 Note : -  
 Inlet : Direct      Ion Mode : EI+  
 Spectrum Type : Normal Ion [EF-Linear]  
 RT : 1.38 min      Scan# : (28,29)  
 BP : m/z 483.1311      Int. : 61.55  
 Output m/z range : 439.0000 to 499.0000      Cut Level : 0.00 %

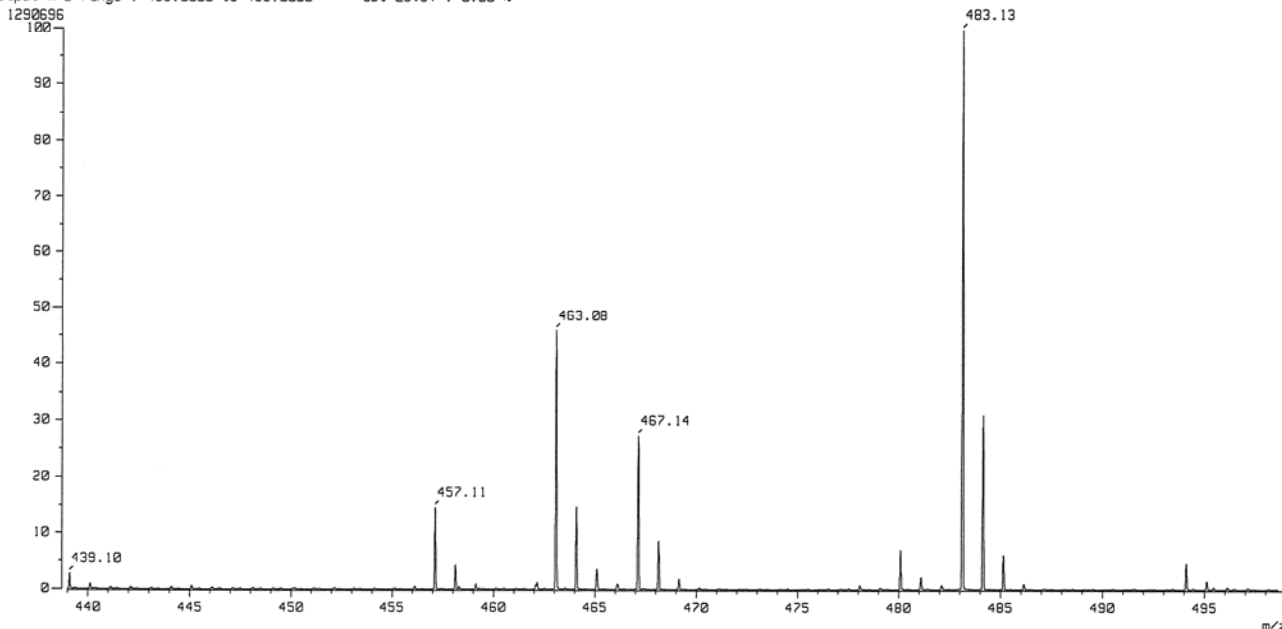

[ Elemental Composition ]

Data : x9-13-C28H23NO6      Date : 04-Nov-2013 14:51  
 Sample : -  
 Note : -  
 Inlet : Direct      Ion Mode : EI+  
 RT : 1.38 min      Scan#: (28,29)  
 Elements : C 28/0, H 23/0, N 1/0, O 6/0  
 Mass Tolerance : 1000ppm, 1mmu if m/z < 1, 3mmu if m/z > 3  
 Unsaturation (U.S.) : -0.5 - 100.0

| Observed m/z | Int%  | Err [ppm / mmu] | U.S. Composition     |
|--------------|-------|-----------------|----------------------|
| 457.1142     | 14.7  |                 |                      |
| 463.0780     | 46.1  |                 |                      |
| 464.0827     | 14.8  |                 |                      |
| 467.1366     | 27.4  | -0.6 / -0.3     | 19.0 C 28 H 21 N O 6 |
| 483.1311     | 100.0 |                 |                      |
| 484.1335     | 31.0  |                 |                      |

<sup>1</sup>H NMR of Compound **20**

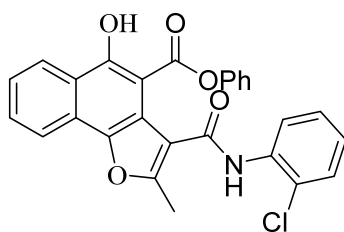

300 MHz, DMSO-d<sub>6</sub>

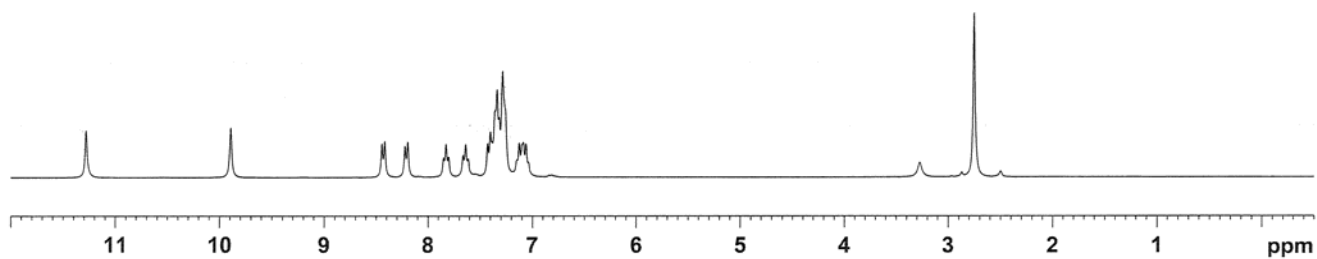

<sup>13</sup>C NMR of Compound **20**

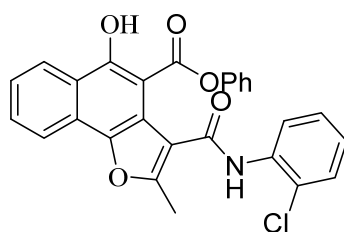

75 MHz, DMSO-d<sub>6</sub>

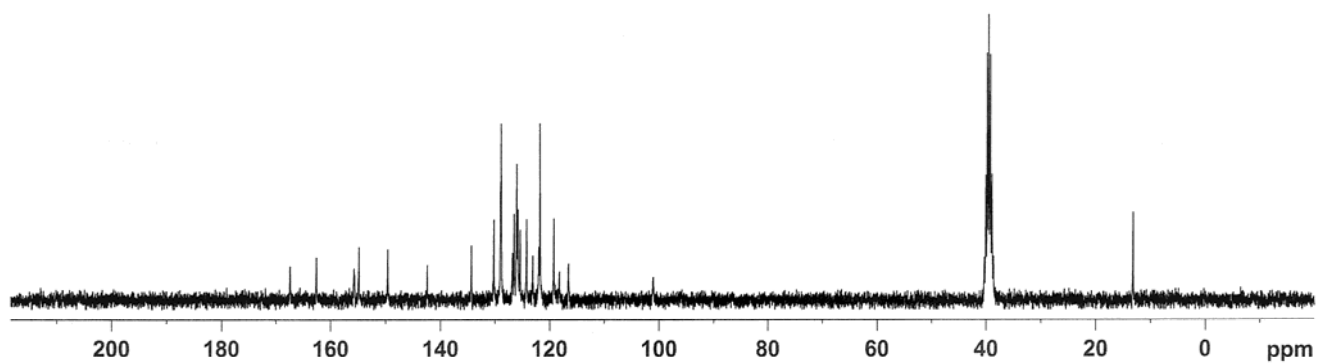

[ Mass Spectrum ]  
 Data : x9-14-C27H22ClNO5      Date : 04-Nov-2013 14:56  
 Sample : -  
 Note : -  
 Inlet : Direct      Ion Mode : EI+  
 Spectrum Type : Normal Ion [EF-Linear]  
 RT : 1.18 min      Scan# : (24,25)  
 BP : m/z 471.0873      Int. : 22.51  
 Output m/z range : 443.0000 to 505.0000      Cut Level : 0.00 %

Mass Spectrum of Compound 20

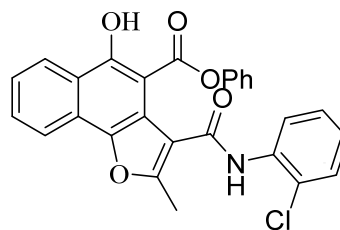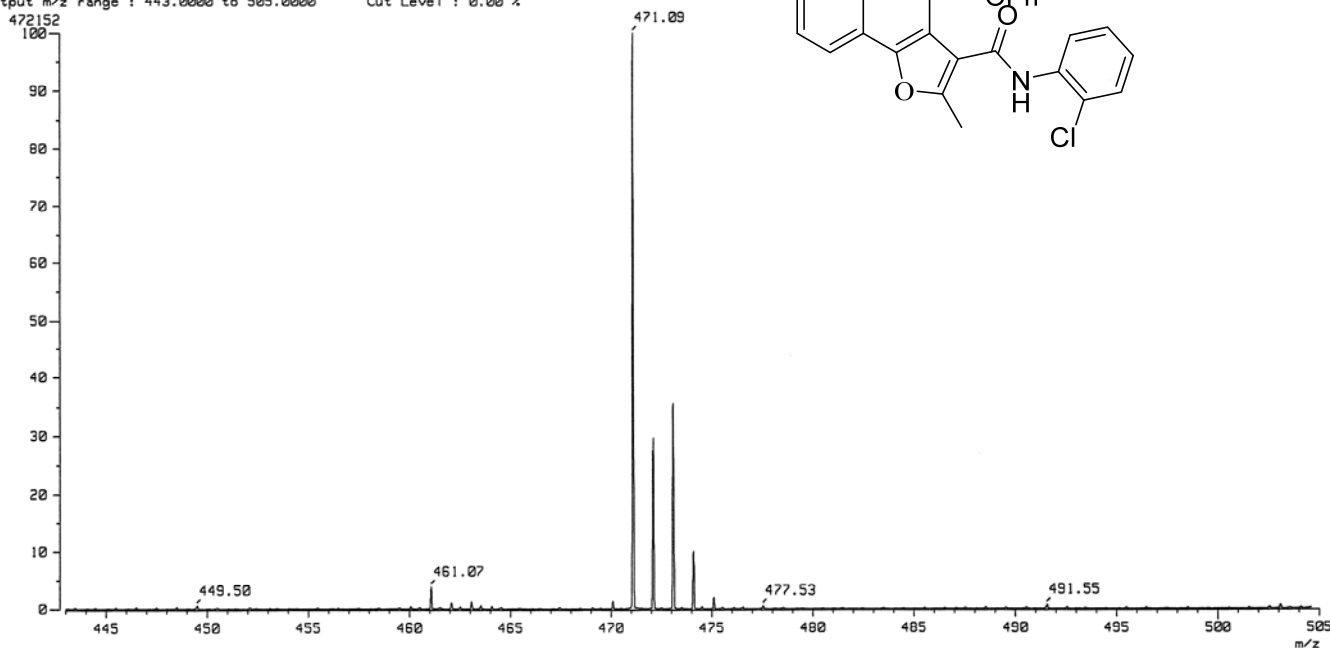

[ Elemental Composition ]

Data : x9-14-C27H22ClNO5  
 Sample : -  
 Note : -

Date : 04-Nov-2013 14:56

Page: 1

Inlet : Direct

Ion Mode : EI+

RT : 1.18 min

Scan#: (24,25)

Elements : C 27/0, H 22/0, Cl 1/0, N 1/0, O 5/0

Mass Tolerance : 1000ppm, 1mmu if m/z < 1, 2mmu if m/z > 2

Unsaturation (U.S.) : -0.5 - 100.0

| Observed m/z | Int%  | Err [ppm / mmu] | U.S. Composition        |
|--------------|-------|-----------------|-------------------------|
| 471.0873     | 100.0 | -0.1 / -0.1     | 19.0 C 27 H 18 Cl N O 5 |
| 472.0923     | 29.7  |                 |                         |
| 473.0851     | 35.6  |                 |                         |
| 474.0884     | 10.0  |                 |                         |

<sup>1</sup>H NMR of Compound 21

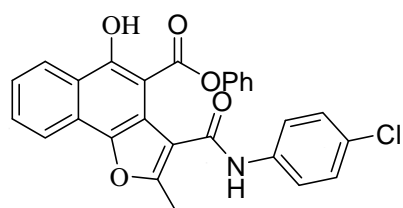

300 MHz, DMSO-d<sub>6</sub>

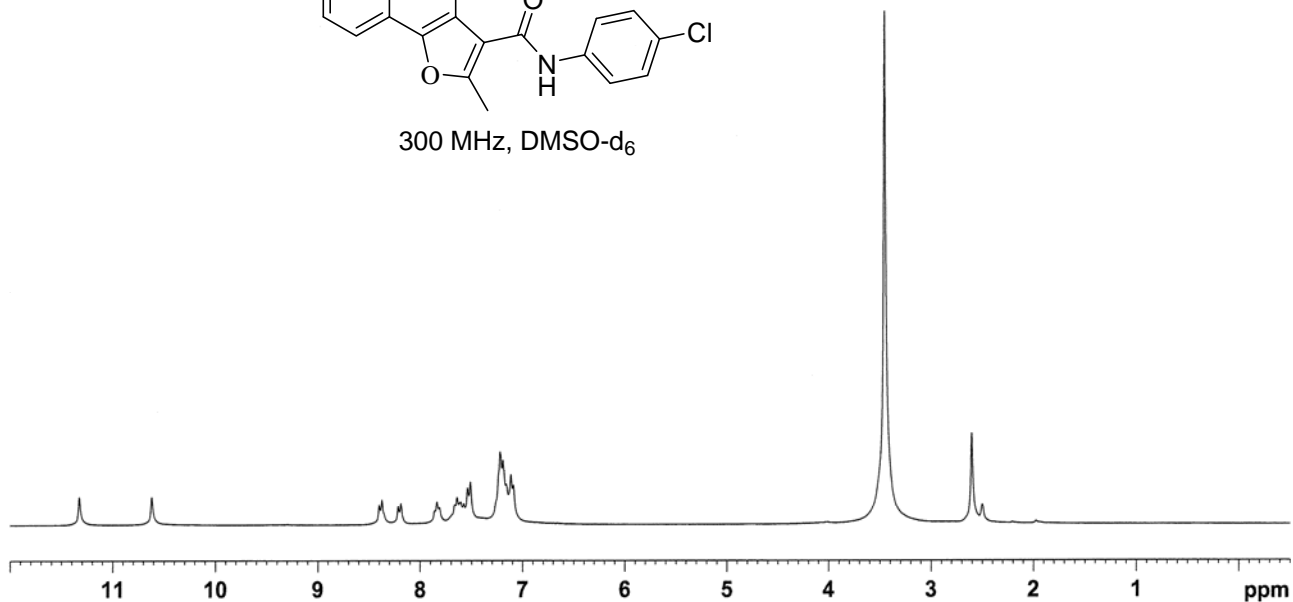

<sup>13</sup>C NMR of Compound 21

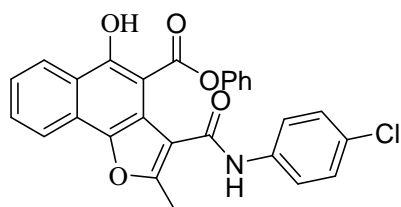

75 MHz, DMSO-d<sub>6</sub>

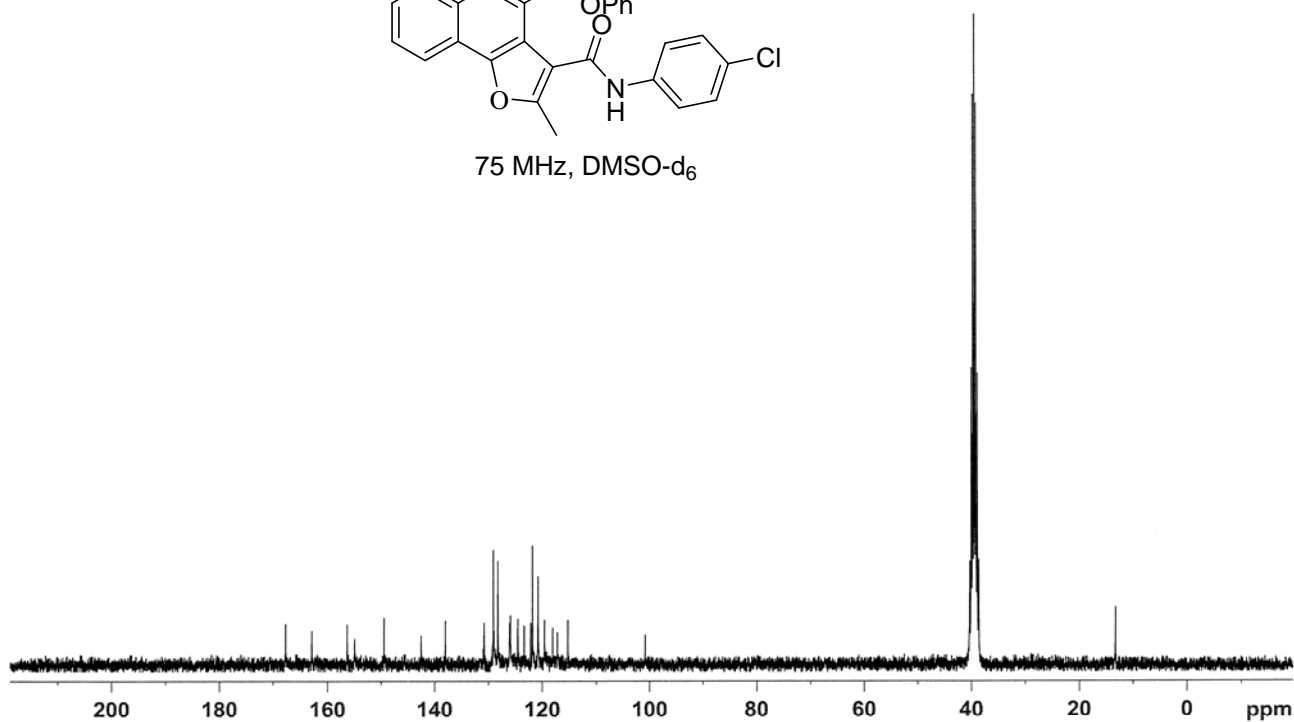



[ Mass Spectrum ]  
 Date : 04-Nov-2013 15:01  
 Sample : -  
 Note : -  
 Inlet : Direct Ion Mode : EI+  
 Spectrum Type : Normal Ion [EF-Linear]  
 RT : 1.83 min Scan# : (37,38)  
 BP : m/z 471.0872 Int. : 83.71  
 Output m/z range : 443.0000 to 505.0000 Cut Level : 0.00 %

Mass Spectrum of Compound 21

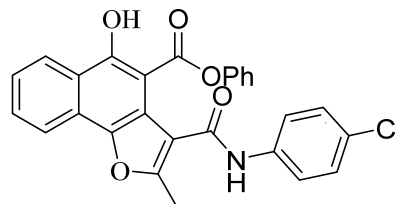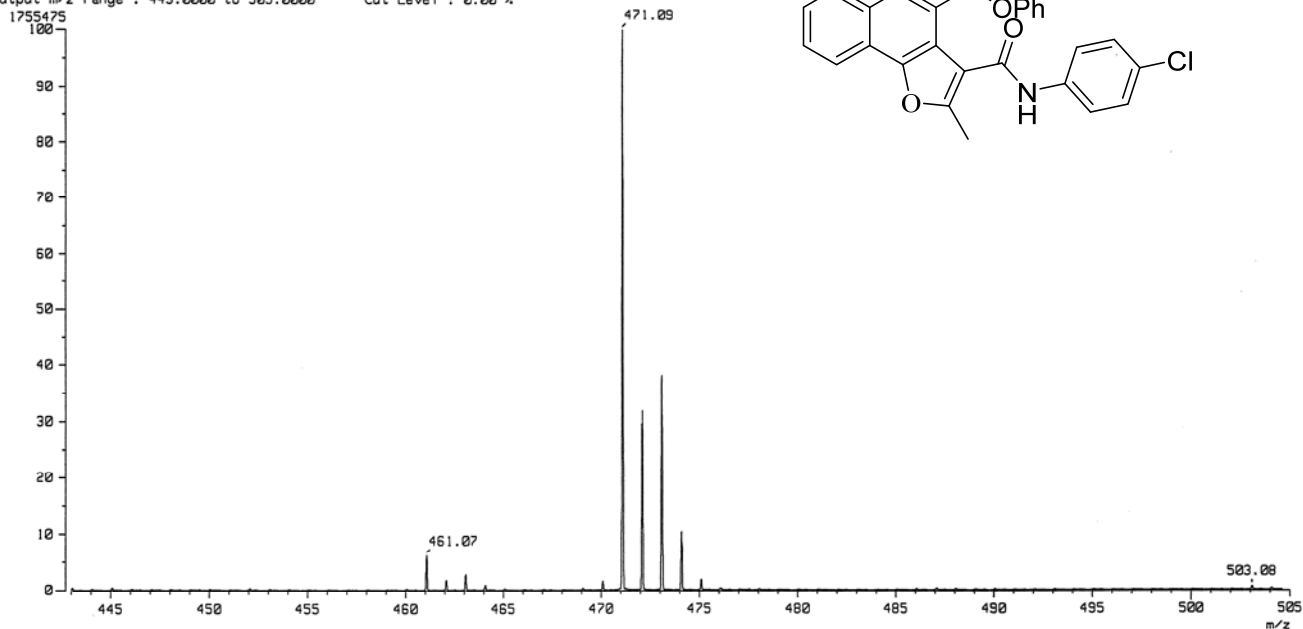

[ Elemental Composition ]

Data : x9-15-C27H20ClNO5

Date : 04-Nov-2013 15:01

Page: 1

Sample : -

Note : -

Inlet : Direct

Ion Mode : EI+

RT : 1.83 min

Scan#: (37,38)

Elements : C 27/0, H 20/0, Cl 1/0, N 1/0, O 5/0

Mass Tolerance : 1000ppm, 1mmu if m/z < 1, 3mmu if m/z > 3

Unsaturation (U.S.) : -0.5 - 100.0

| Observed m/z | Int%  | Err [ppm / mmu] | U.S. Composition        |
|--------------|-------|-----------------|-------------------------|
| 471.0872     | 100.0 | -0.3 / -0.1     | 19.0 C 27 H 18 Cl N O 5 |
| 472.0909     | 31.9  |                 |                         |
| 473.0858     | 38.2  |                 |                         |
| 474.0878     | 10.4  |                 |                         |

<sup>1</sup>H NMR of Compound 22

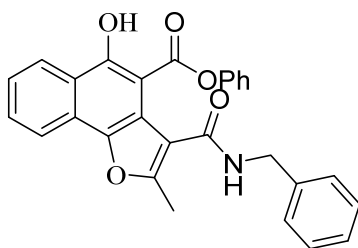

300 MHz, DMSO-d<sub>6</sub>

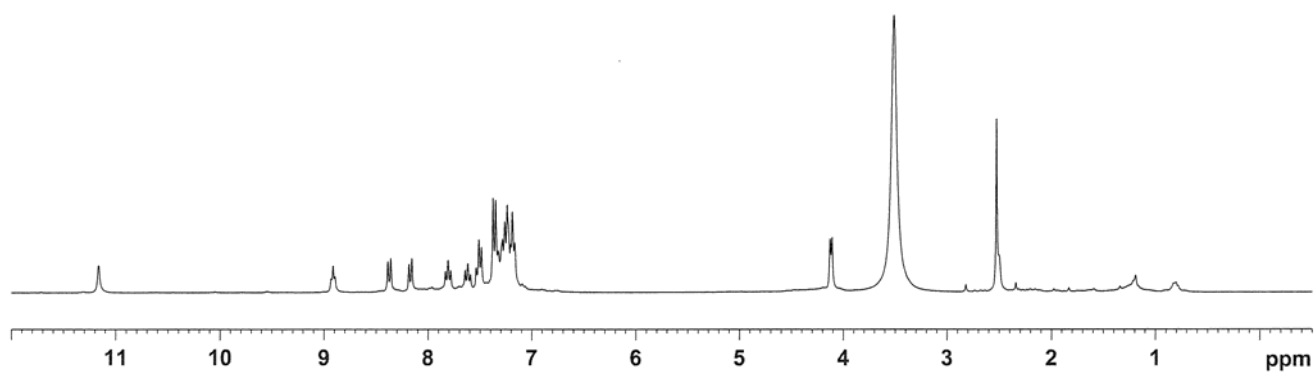

<sup>13</sup>C NMR of Compound 22

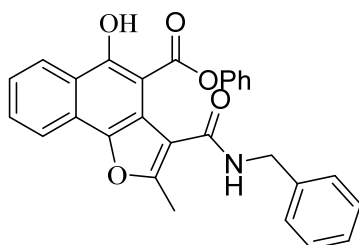

75 MHz, DMSO-d<sub>6</sub>

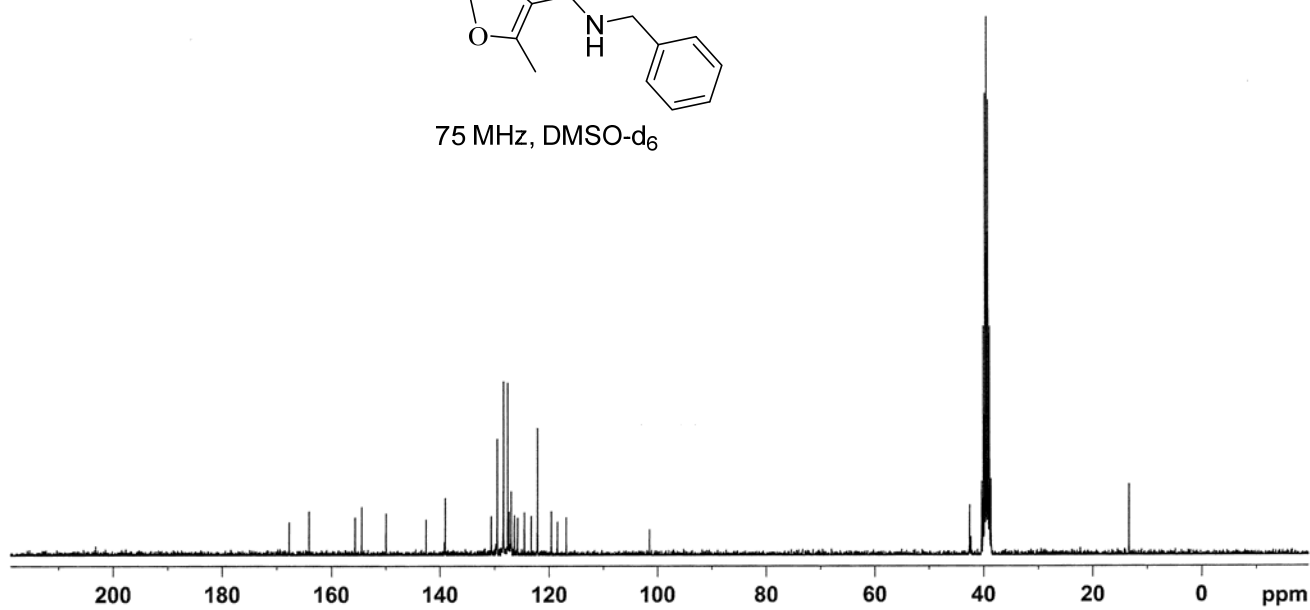

[ Mass Spectrum ]  
 Data : X9-16-C28H21NO5  
 Sample: -  
 Note: -  
 Inlet : Direct  
 Spectrum Type : Normal Ion [EF-Linear]  
 RT : 1.68 min Scan# : (34,35)  
 BP : m/z 441.1217 Int. : 17.38  
 Output m/z range : 421.0000 to 481.0000

Date : 29-Nov-2013 13:56

Mass Spectrum of Compound 22

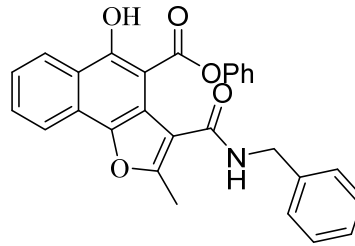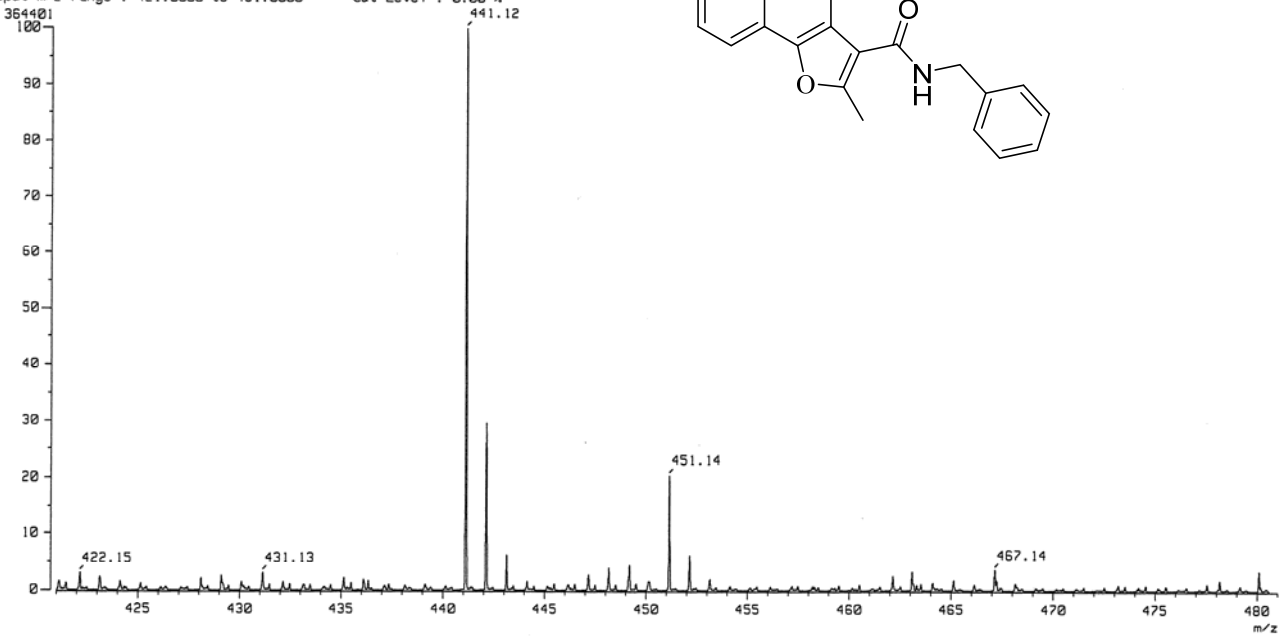

[ Elemental Composition ]

Data : X9-16-C28H21NO5

Date : 29-Nov-2013 13:56

Page: 1

Sample: -  
 Note: -

Inlet : Direct  
 RT : 1.68 min

Ion Mode : EI+  
 Scan#: (34,35)

Elements : C 28/0, H 21/0, N 1/0, O 5/0

Mass Tolerance : 1000ppm, 1mmu if m/z < 1, 3mmu if m/z > 3

Unsaturation (U.S.) : -0.5 - 100.0

| Observed m/z | Int%  | Err[ppm / mmu] | U.S. Composition     |
|--------------|-------|----------------|----------------------|
| 441.1217     | 100.0 |                |                      |
| 442.1251     | 29.7  |                |                      |
| 451.1419     | 20.5  | -0.1 / -0.1    | 19.0 C 28 H 21 N O 5 |

<sup>1</sup>H NMR of Compound 23

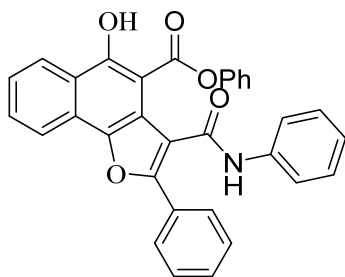

300 MHz, DMSO-d<sub>6</sub>

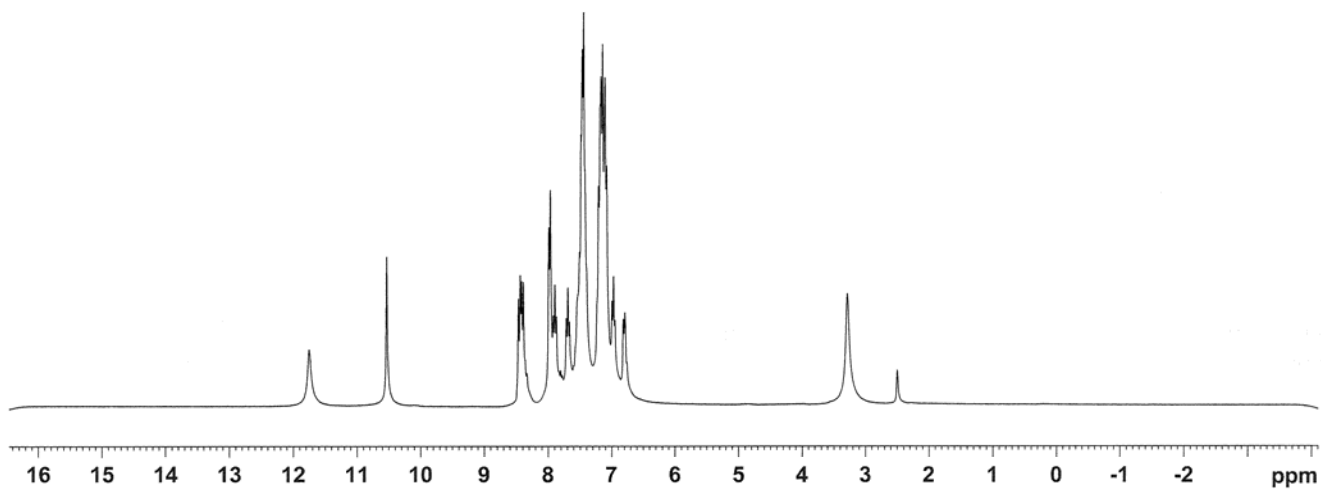

<sup>13</sup>C NMR of Compound 23

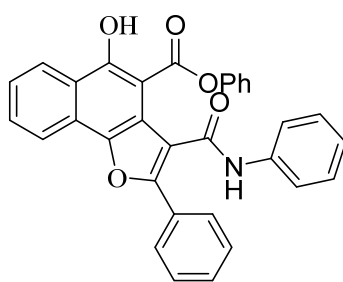

75 MHz, DMSO-d<sub>6</sub>

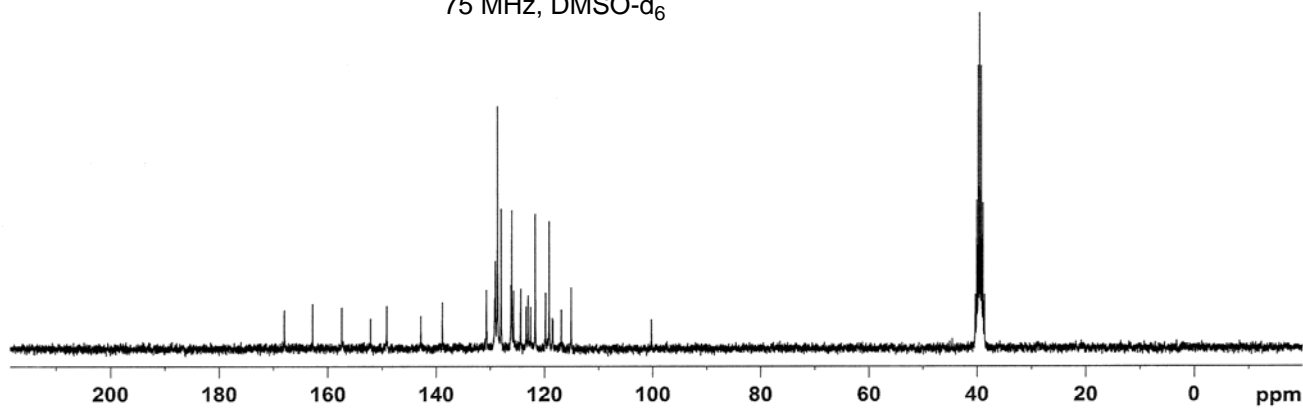

[ Mass Spectrum ]  
 Date : 29-Nov-2013 15:02  
 Sample : -  
 Note : -  
 Inlet : Direct Ion Mode : EI+  
 Spectrum Type : Normal Ion [EF-Linear]  
 RT : 1.53 min Scan# : (31,32)  
 BP : m/z 499.1422 Int. : 19.35  
 Output m/z range : 469.0000 to 529.0000 Cut Level : 0.00 %

Mass Spectrum of Compound 23

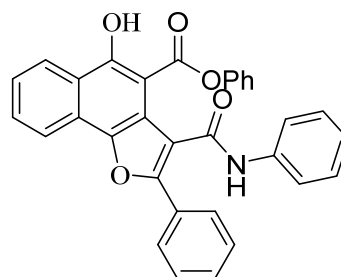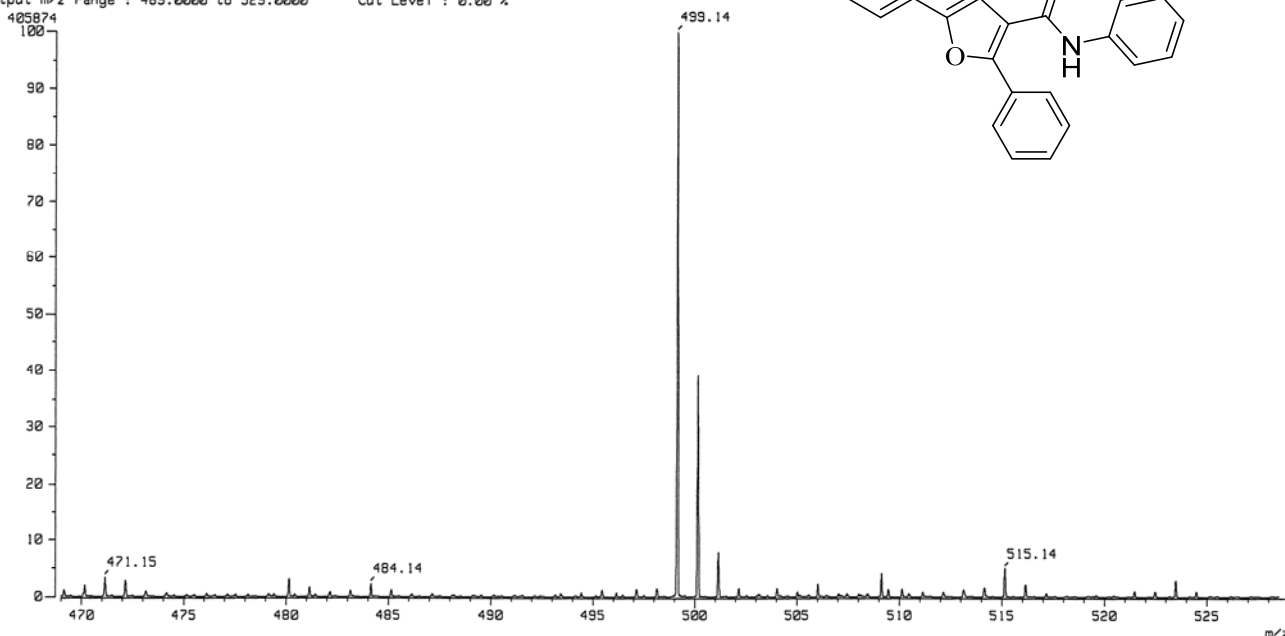

[ Elemental Composition ]

Page: 1

Data : x9-17-C32H21NO5 Date : 29-Nov-2013 15:02  
 Sample : -  
 Note : -  
 Inlet : Direct Ion Mode : EI+  
 RT : 1.53 min Scan# : (31,32)  
 Elements : C 32/0, H 21/0, N 1/0, O 5/0  
 Mass Tolerance : 1000ppm, 1mmu if m/z < 1, 3mmu if m/z > 3  
 Unsaturation (U.S.) : -0.5 - 100.0

| Observed m/z | Int%  | Err [ppm / mmu] | U.S. | Composition     |
|--------------|-------|-----------------|------|-----------------|
| 499.1422     | 100.0 | +0.5 / +0.3     | 23.0 | C 32 H 21 N O 5 |
| 500.1451     | 39.2  |                 |      |                 |

<sup>1</sup>H NMR of Compound **26**

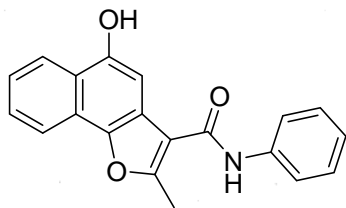

600 MHz, DMSO-d<sub>6</sub>

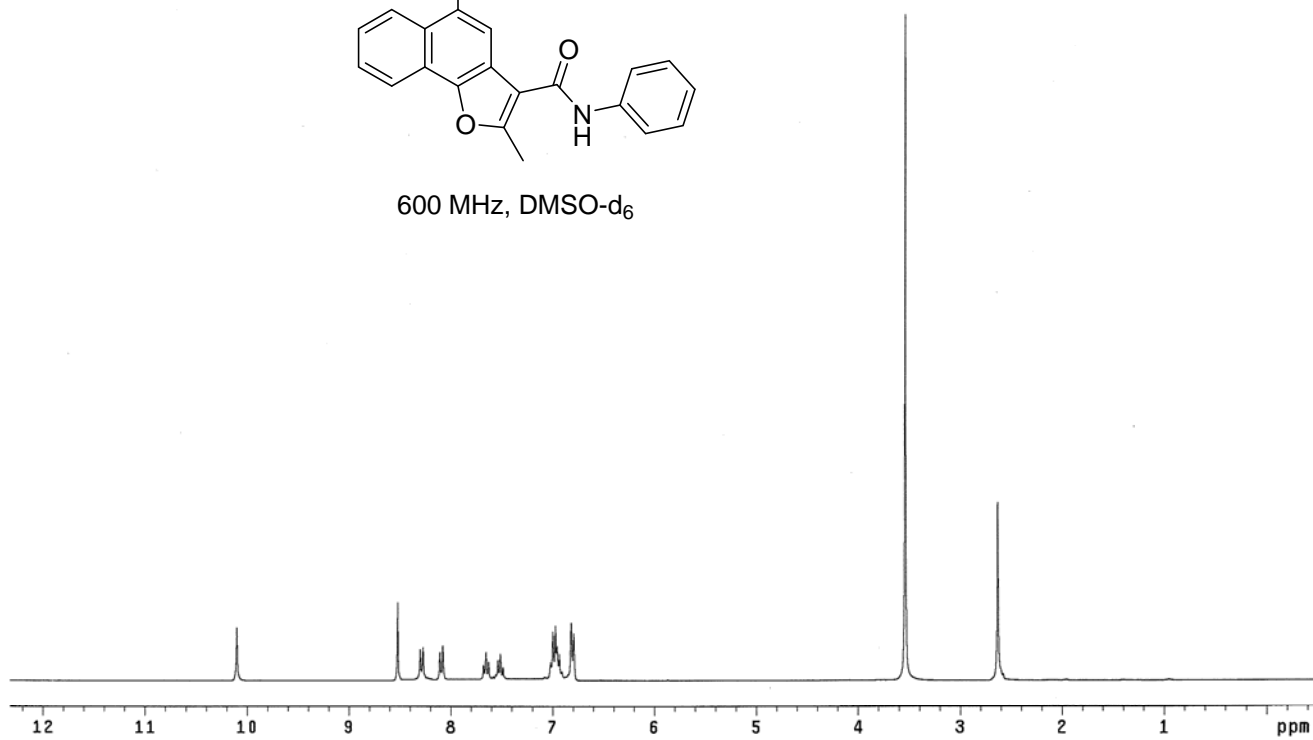

<sup>13</sup>C NMR of Compound **26**

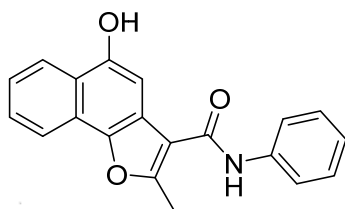

75 MHz, DMSO-d<sub>6</sub>

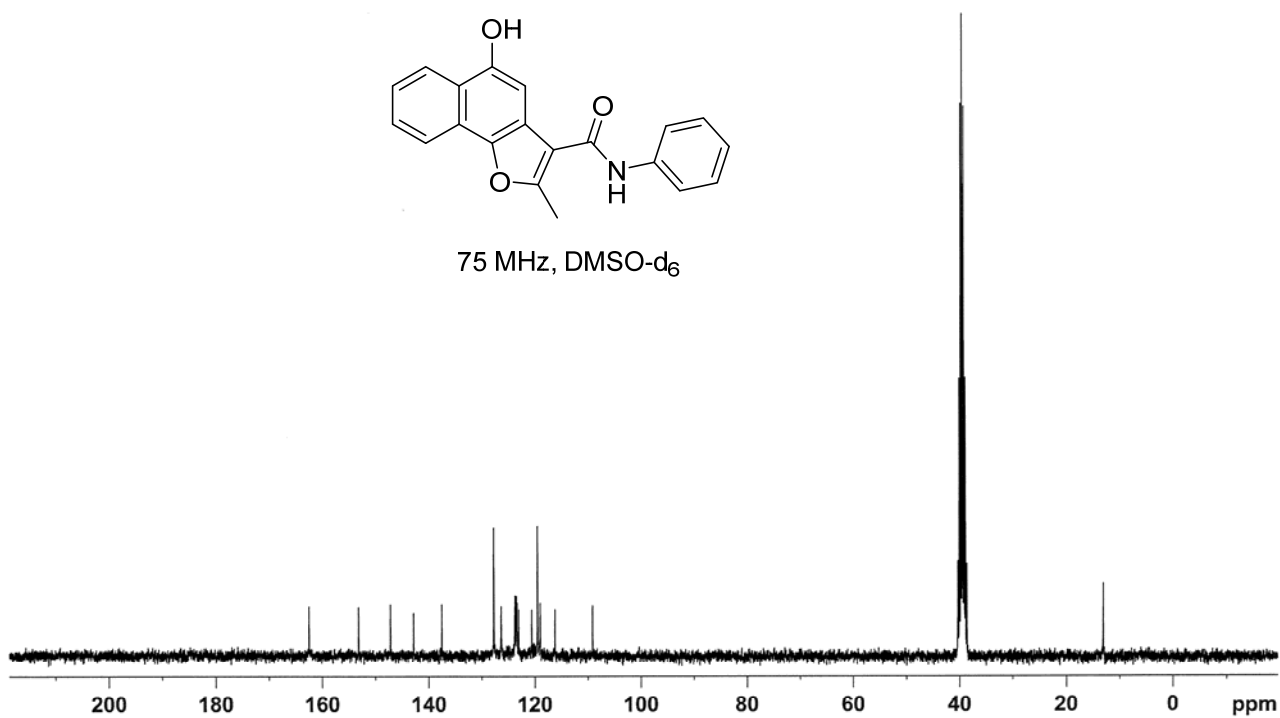

[ Mass Spectrum ]  
 Data : x9-18-C20H15NO3 Date : 29-Nov-2013 15:07  
 Sample: -  
 Note: -  
 Inlet : Direct Ion Mode : EI+  
 Spectrum Type : Normal Ion [EF-Linear]  
 RT : 1.78 min Scan# : (36,37)  
 BP : m/z 317.1051 Int. : 25.46  
 Output m/z range : 294.1217 to 346.4659 Cut Level : 0.00 %  
 565025

Mass Spectrum of Compound 26

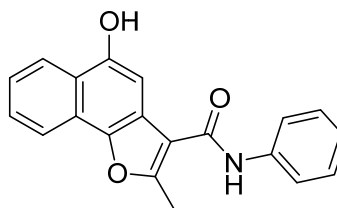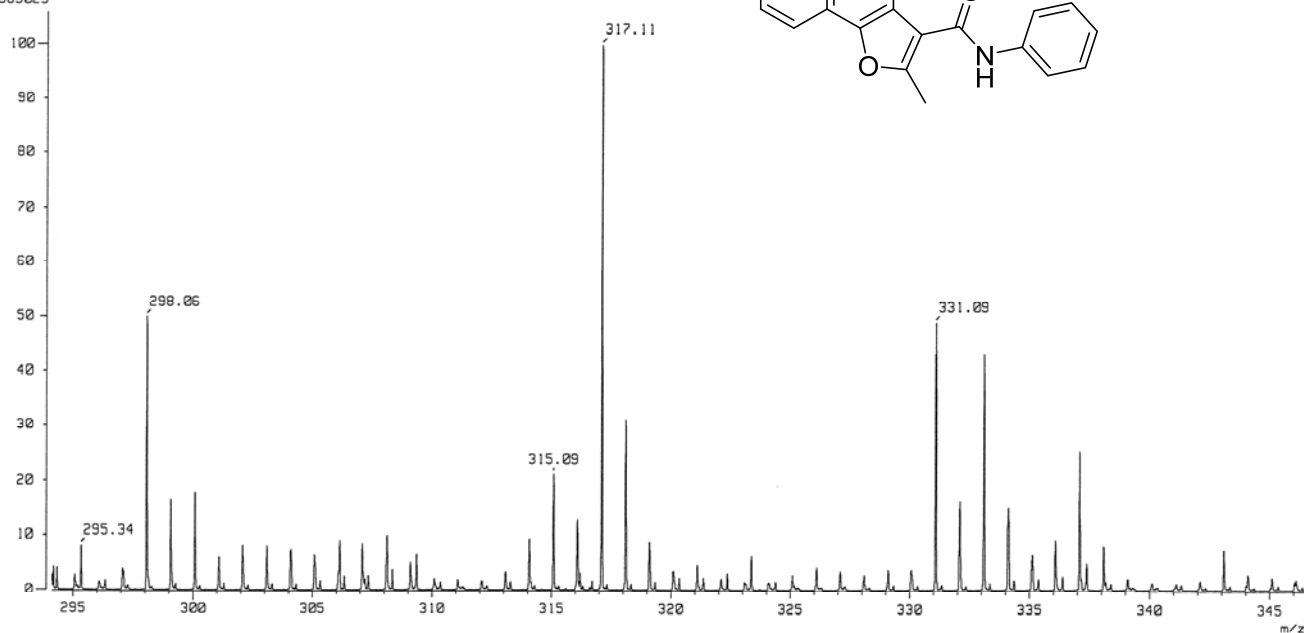

[ Elemental Composition ]

Data : x9-18-C20H15NO3 Date : 29-Nov-2013 15:07  
 Sample: -  
 Note: -  
 Inlet : Direct Ion Mode : EI+  
 RT : 1.78 min Scan#: (36,37)  
 Elements : C 20/0, H 15/0, N 1/0, O 3/0  
 Mass Tolerance : 1000ppm, 1mmu if m/z < 1, 3mmu if m/z > 3  
 Unsaturation (U.S.) : -0.5 - 100.0

Page: 1

| Observed m/z | Int%  | Err [ppm / mmu] | U.S. | Composition     |
|--------------|-------|-----------------|------|-----------------|
| 298.0647     | 50.0  | +5.6 / +1.7     | 16.0 | C 20 H 10 O 3   |
| 299.0710     | 16.7  | +0.7 / +0.2     | 15.5 | C 20 H 11 O 3   |
| 300.0789     | 18.0  | +0.9 / +0.3     | 15.0 | C 20 H 12 O 3   |
| 315.0909     | 21.2  | +4.1 / +1.3     | 15.0 | C 20 H 13 N O 3 |
| 316.0889     | 12.8  |                 |      |                 |
| 317.1051     | 100.0 | -0.3 / -0.1     | 14.0 | C 20 H 15 N O 3 |
| 318.1070     | 31.2  |                 |      |                 |
| 331.0870     | 49.1  |                 |      |                 |
| 332.0888     | 16.5  |                 |      |                 |
| 333.1033     | 43.3  |                 |      |                 |
| 334.1174     | 15.3  |                 |      |                 |
| 337.0868     | 25.5  |                 |      |                 |

<sup>1</sup>H NMR of Compound 27

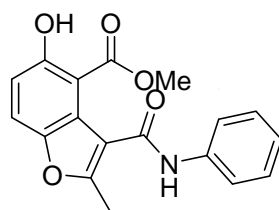

300 MHz, CDCl<sub>3</sub>

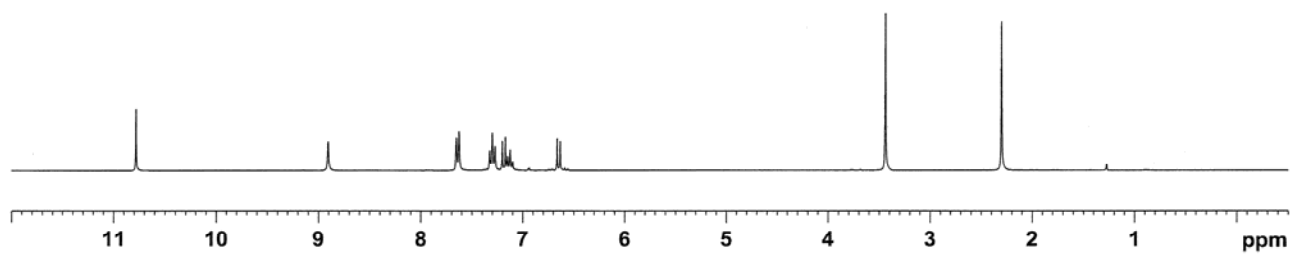

<sup>13</sup>C NMR of Compound 27

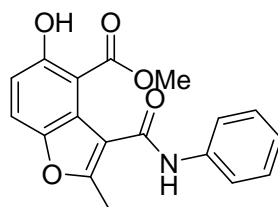

75 MHz, CDCl<sub>3</sub>

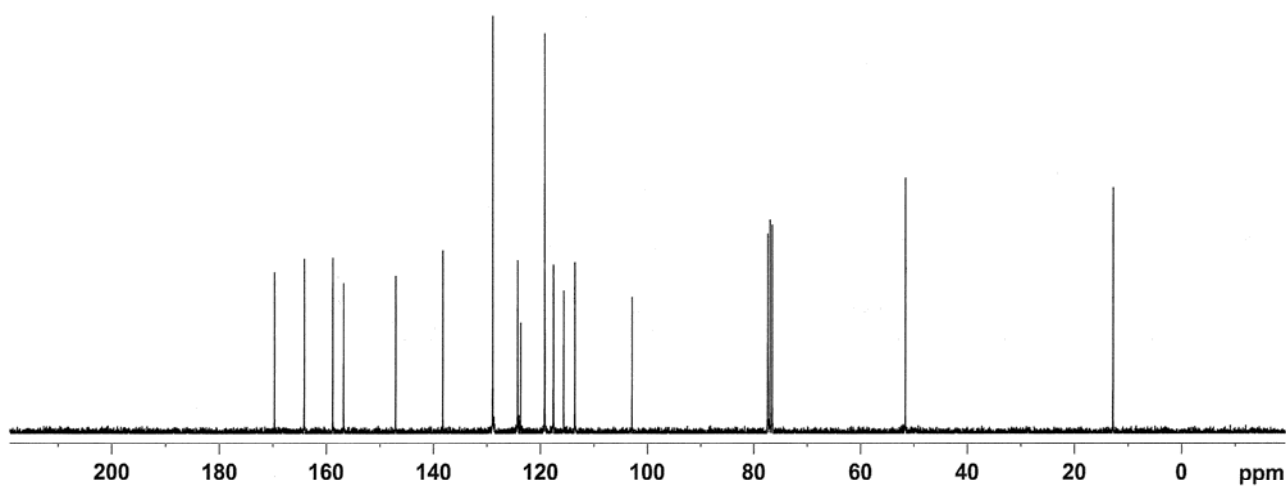



[ Mass Spectrum ]  
 Date : 29-Nov-2013 15:14  
 Sample : -  
 Note : -  
 Inlet : Direct Ion Mode : EI+  
 Spectrum Type : Normal Ion [EF-Linear]  
 RT : 0.58 min Scan# : (12,13)  
 BP : m/z 325.0952 Int. : 50.00  
 Output m/z range : 295.0000 to 355.0000 Cut Level : 0.00 %

### Mass Spectrum of Compound 27

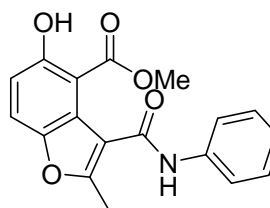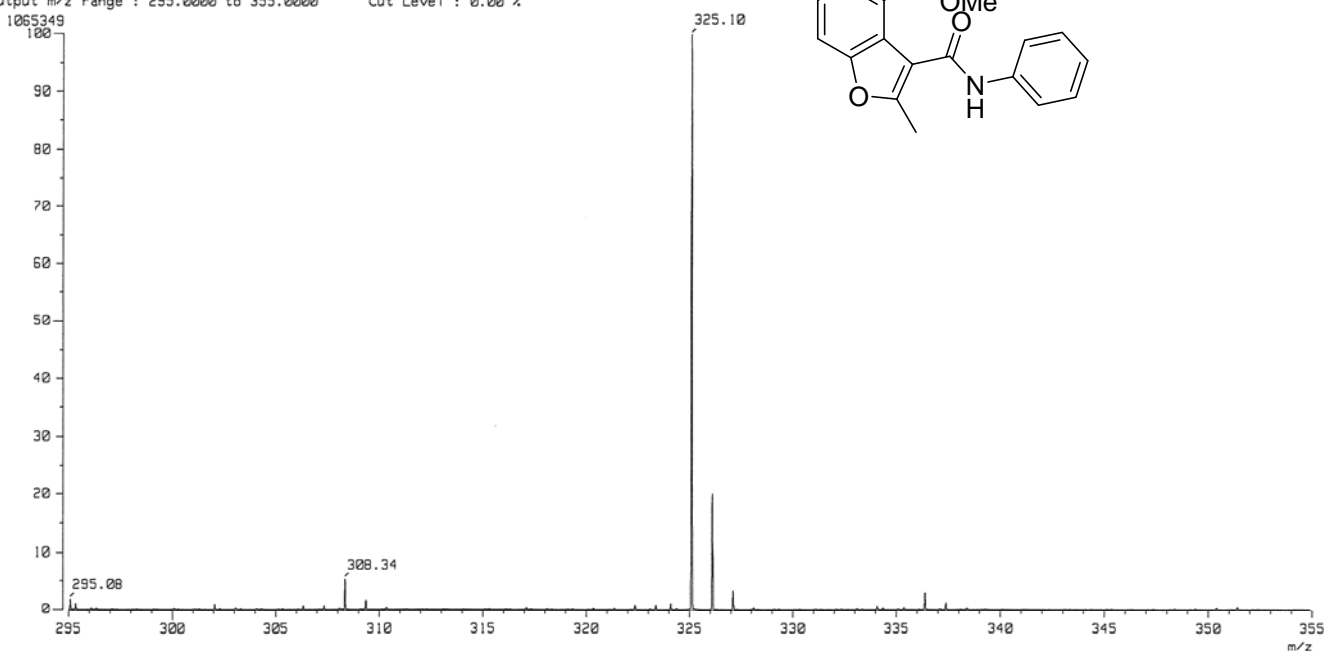

### [ Elemental Composition ]

Data : X9-19-C18H15NO5 Date : 29-Nov-2013 15:14  
 Sample : -  
 Note : -  
 Inlet : Direct Ion Mode : EI+  
 RT : 0.58 min Scan# : (12,13)  
 Elements : C 18/0, H 15/0, N 1/0, O 5/0  
 Mass Tolerance : 1000ppm, 1mmu if m/z < 1, 3mmu if m/z > 3  
 Unsaturation (U.S.) : -0.5 - 100.0

Page: 1

| Observed m/z | Int%  | Err [ppm / mmu] | U.S. | Composition     |
|--------------|-------|-----------------|------|-----------------|
| 325.0952     | 100.0 | +0.4 / +0.1     | 12.0 | C 18 H 15 N O 5 |
| 326.0996     | 20.2  |                 |      |                 |

<sup>1</sup>H NMR of Compound 28

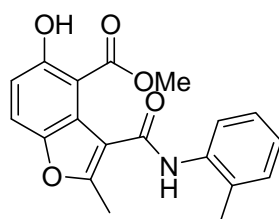

300 MHz, DMSO-d<sub>6</sub>

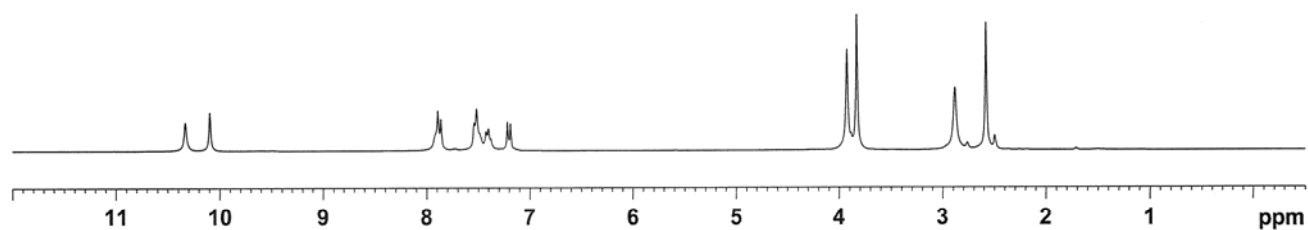

<sup>13</sup>C NMR of Compound 28

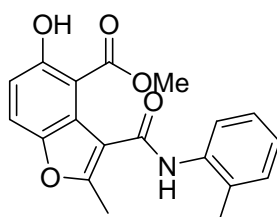

75 MHz, DMSO-d<sub>6</sub>

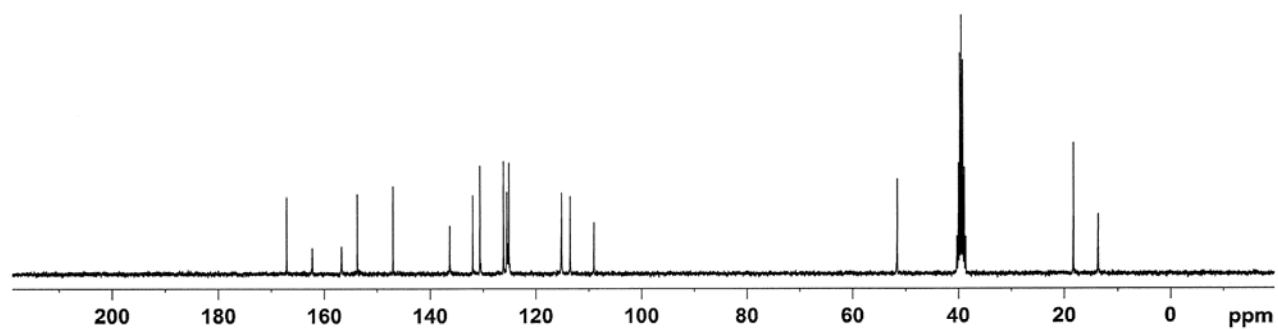

[ Mass Spectrum ]  
 Date : x9-43-C19H17NO5      Date : 29-Nov-2013 16:37  
 Sample: -  
 Note : -  
 Inlet : Direct      Ion Mode : EI+  
 Spectrum Type : Normal Ion [EF-Linear]  
 RT : 0.58 min      Scan# : (12,13)  
 BP : m/z 339.1106      Int. : 52.77  
 Output m/z range : 309.0000 to 369.0000      Cut Level : 0.00 %

Mass Spectrum of Compound 28

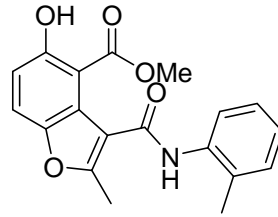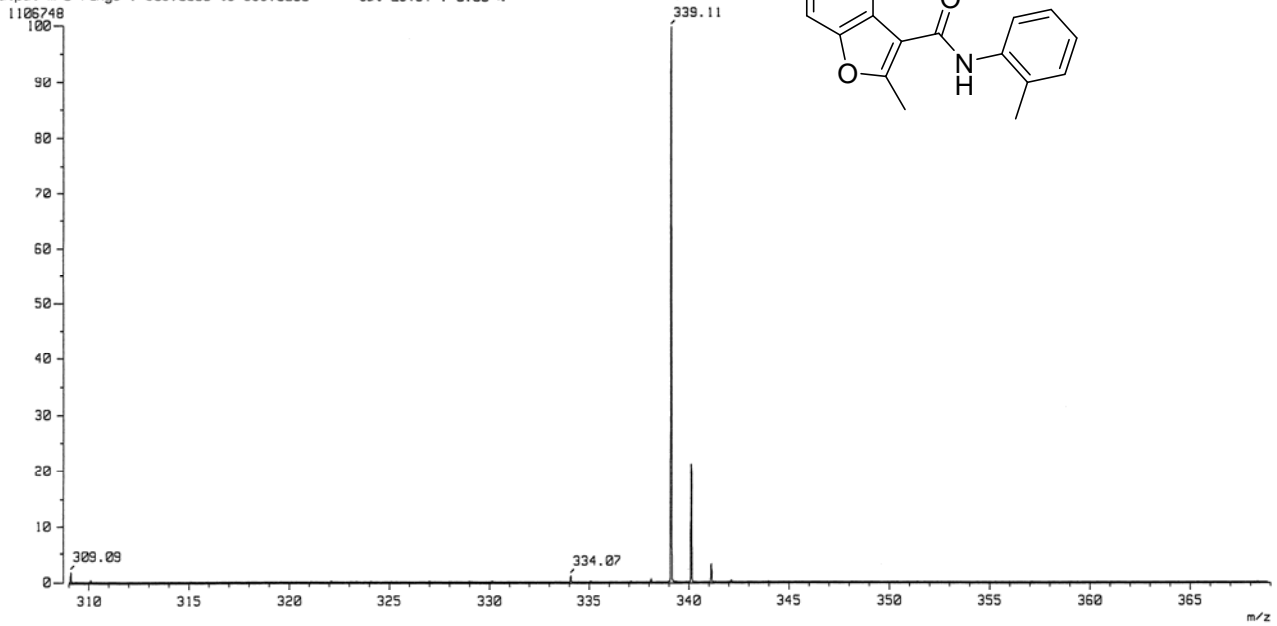

[ Elemental Composition ]

Data : x9-43-C19H17NO5      Date : 29-Nov-2013 16:37  
 Sample: -  
 Note : -  
 Inlet : Direct      Ion Mode : EI+  
 RT : 0.58 min      Scan#: (12,13)  
 Elements : C 19/0, H 17/0, N 1/0, O 5/0  
 Mass Tolerance : 1000ppm, 1mmu if m/z < 1, 3mmu if m/z > 3  
 Unsaturation (U.S.) : -0.5 - 100.0

Page: 1

| Observed m/z | Int%  | Err [ppm / mmu] | U.S. Composition     |
|--------------|-------|-----------------|----------------------|
| 339.1106     | 100.0 | -0.3 / -0.1     | 12.0 C 19 H 17 N O 5 |
| 340.1144     | 21.4  |                 |                      |

<sup>1</sup>H NMR of Compound **29**

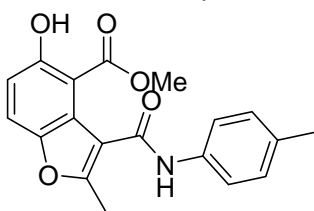

300 MHz, CDCl<sub>3</sub>

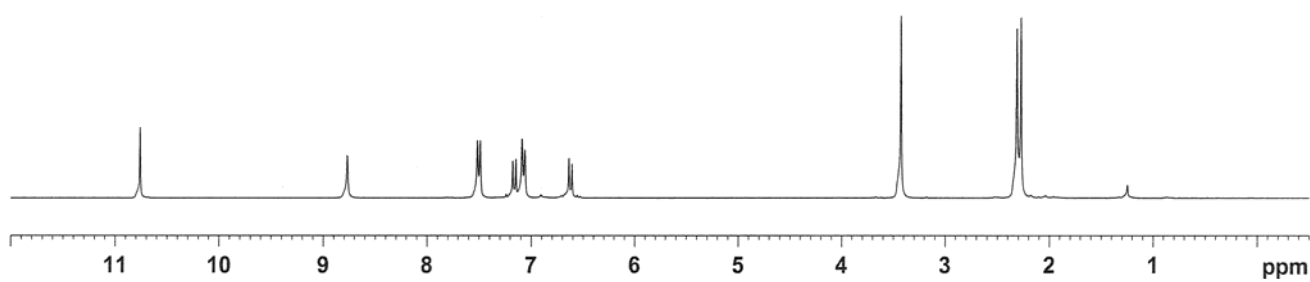

<sup>13</sup>C NMR of Compound **29**

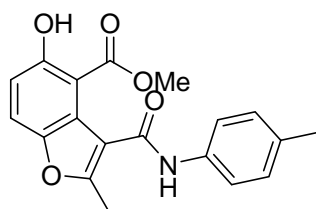

75 MHz, CDCl<sub>3</sub>

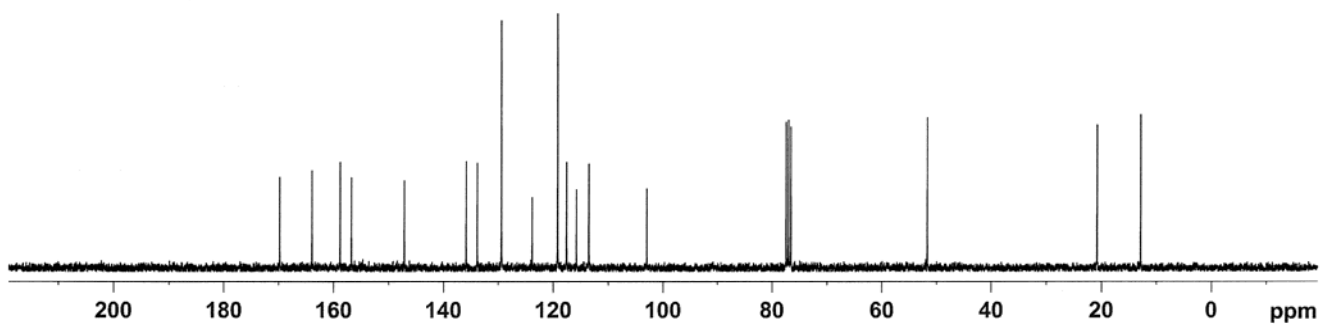

[ Mass Spectrum ]  
 Date : 29-Nov-2013 15:17  
 Sample : -  
 Note : -  
 Inlet : Direct Ion Mode : EI+  
 Spectrum Type : Normal Ion [EF-Linear]  
 RT : 0.53 min Scan# : (11,12)  
 BP : m/z 339.1104 Int. : 63.85  
 Output m/z range : 309.0000 to 369.0000 Cut Level : 0.00 %

Mass Spectrum of Compound 29

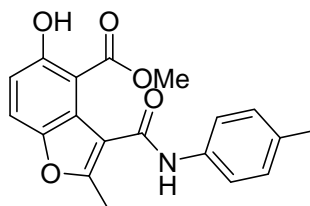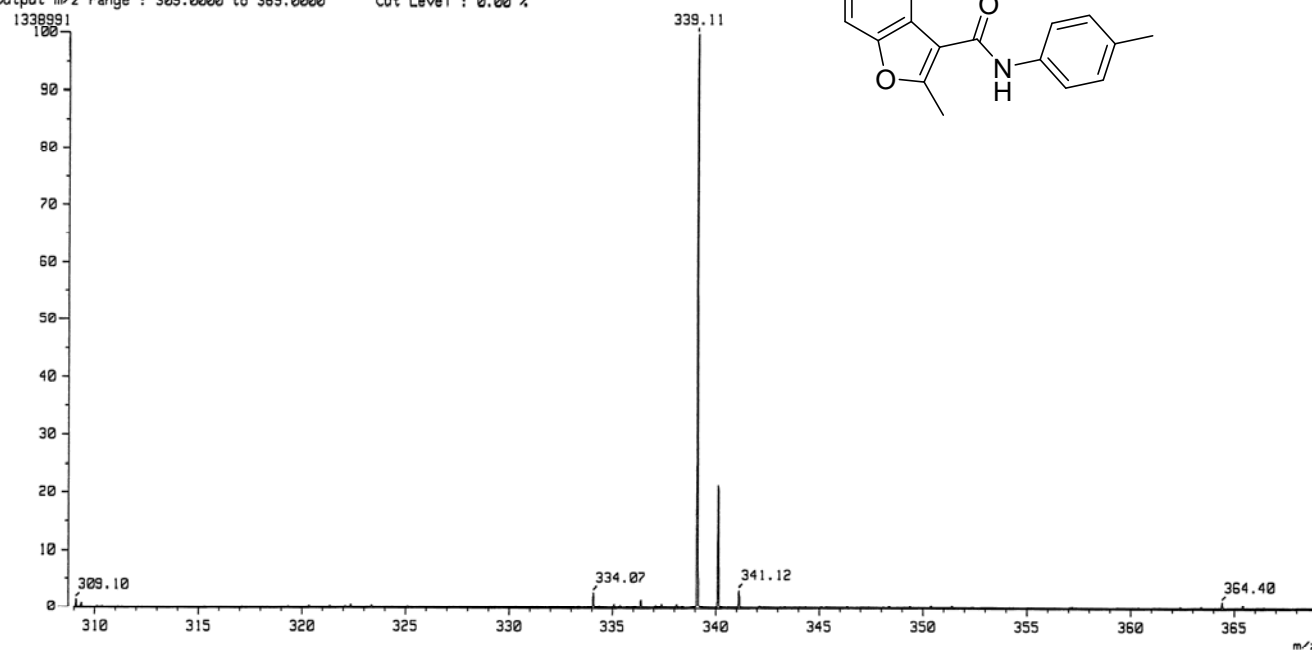

[ Elemental Composition ]

Data : x9-20-C19H17NO5 Date : 29-Nov-2013 15:17  
 Sample : -  
 Note : -  
 Inlet : Direct Ion Mode : EI+  
 RT : 0.53 min Scan# : (11,12)  
 Elements : C 19/0, H 17/0, N 1/0, O 5/0  
 Mass Tolerance : 1000ppm, 1mmu if m/z < 1, 3mmu if m/z > 3  
 Unsaturation (U.S.) : -0.5 - 100.0

| Observed m/z | Int%  | Err [ppm / mmu] | U.S. Composition     |
|--------------|-------|-----------------|----------------------|
| 339.1104     | 100.0 | -0.9 / -0.3     | 12.0 C 19 H 17 N O 5 |
| 340.1144     | 21.4  |                 |                      |

<sup>1</sup>H NMR of Compound 30

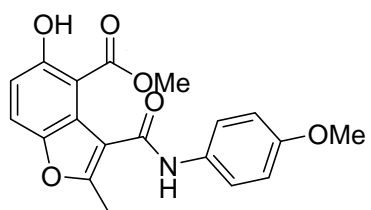

300 MHz, CDCl<sub>3</sub>

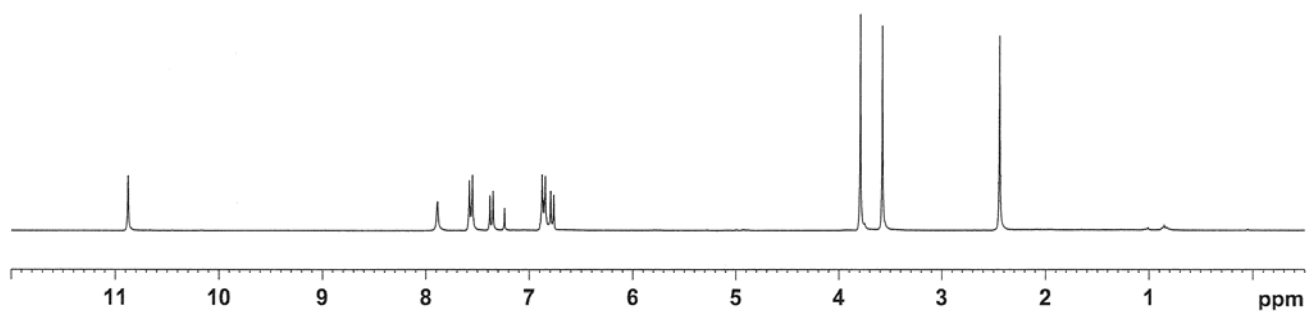

<sup>13</sup>C NMR of Compound 30

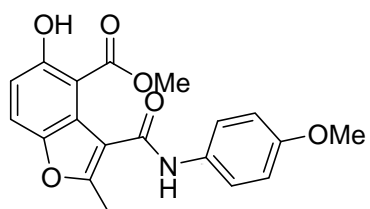

75 MHz, CDCl<sub>3</sub>

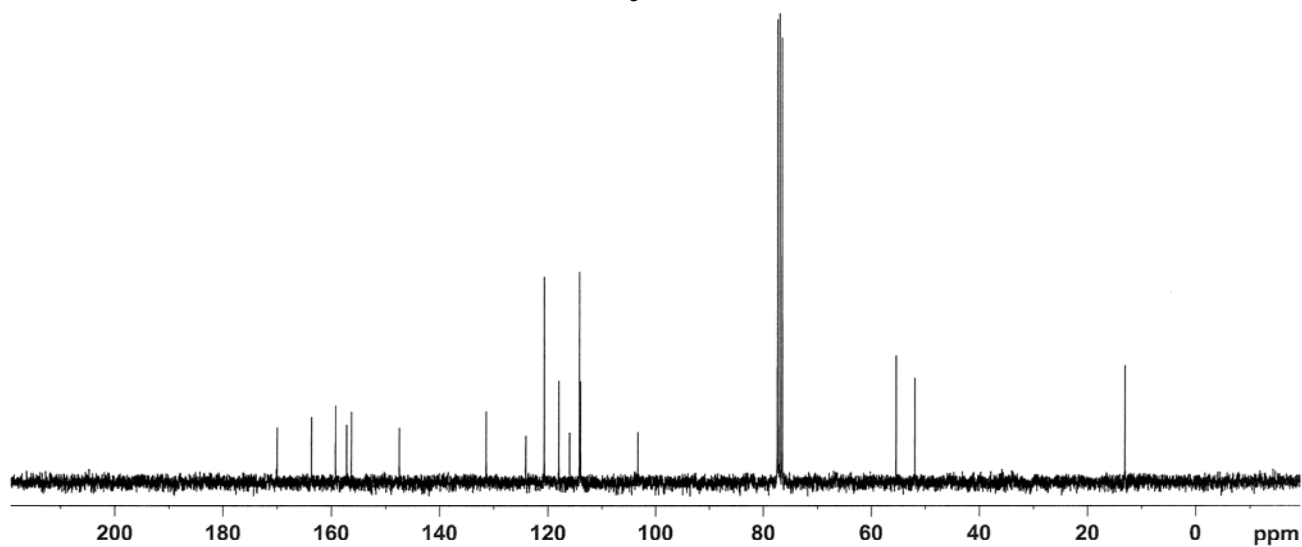

[ Mass Spectrum ]  
 Data : x9-21-C19H17NO6      Date : 29-Nov-2013 15:20  
 Sample : -  
 Note : -  
 Inlet : Direct      Ion Mode : EI+  
 Spectrum Type : Normal Ion [EF-Linear]  
 RT : 0.73 min      Scan# : (15,16)  
 BP : m/z 355.1056      Int. : 56.18  
 Output m/z range : 325.0000 to 385.0000      Cut Level : 0.00 %

Mass Spectrum of Compound 30

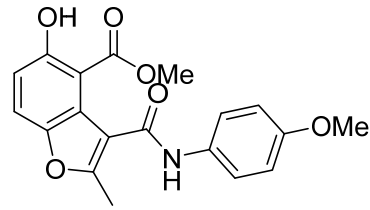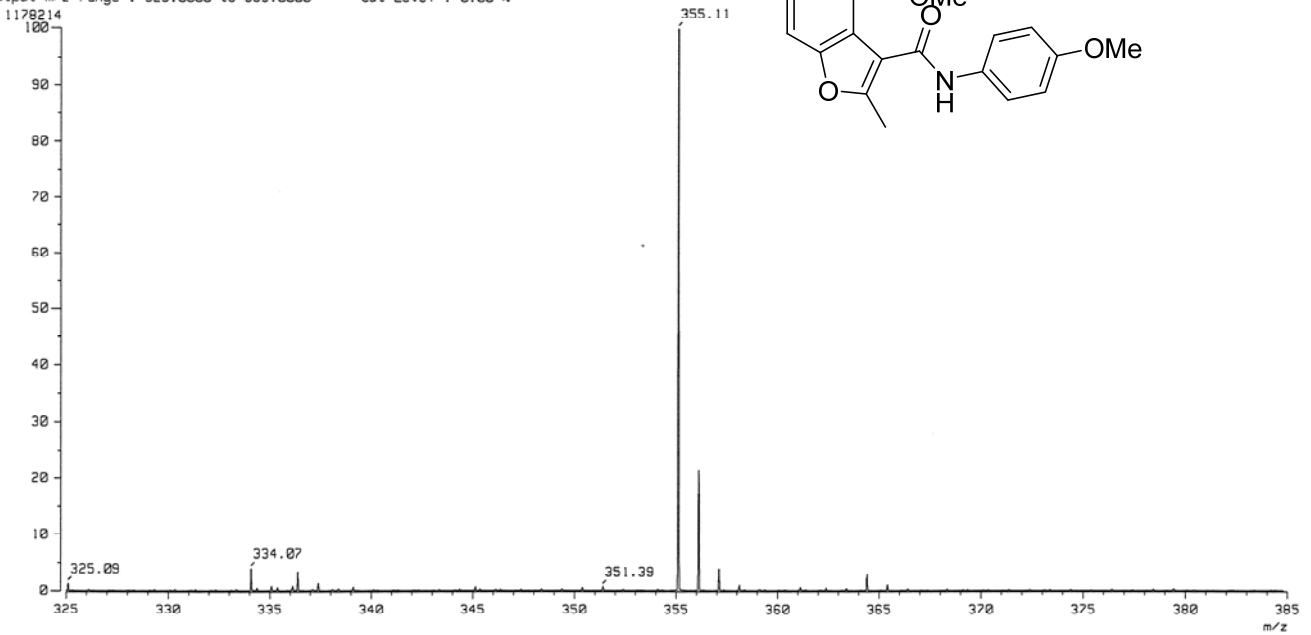

[ Elemental Composition ]

Data : x9-21-C19H17NO6      Date : 29-Nov-2013 15:20  
 Sample : -  
 Note : -  
 Inlet : Direct      Ion Mode : EI+  
 RT : 0.73 min      Scan# : (15,16)  
 Elements : C 19/0, H 17/0, N 1/0, O 6/0  
 Mass Tolerance : 1000ppm, 1mmu if m/z < 1, 3mmu if m/z > 3  
 Unsaturation (U.S.) : -0.5 - 100.0

| Observed m/z | Int%  | Err [ppm / mmu] | U.S. Composition     |
|--------------|-------|-----------------|----------------------|
| 355.1056     | 100.0 | +0.1 / +0.0     | 12.0 C 19 H 17 N O 6 |
| 356.1096     | 21.5  |                 |                      |

<sup>1</sup>H NMR of Compound 31

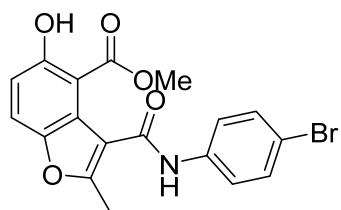

300 MHz, DMSO-d<sub>6</sub>

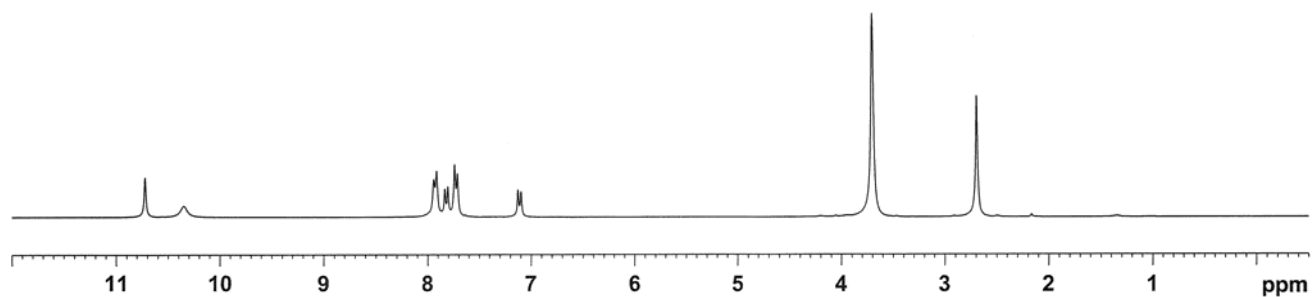

<sup>13</sup>C NMR of Compound 31

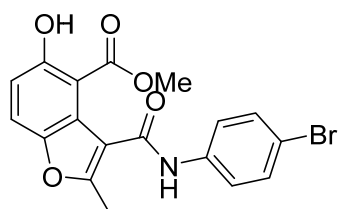

75 MHz, DMSO-d<sub>6</sub>

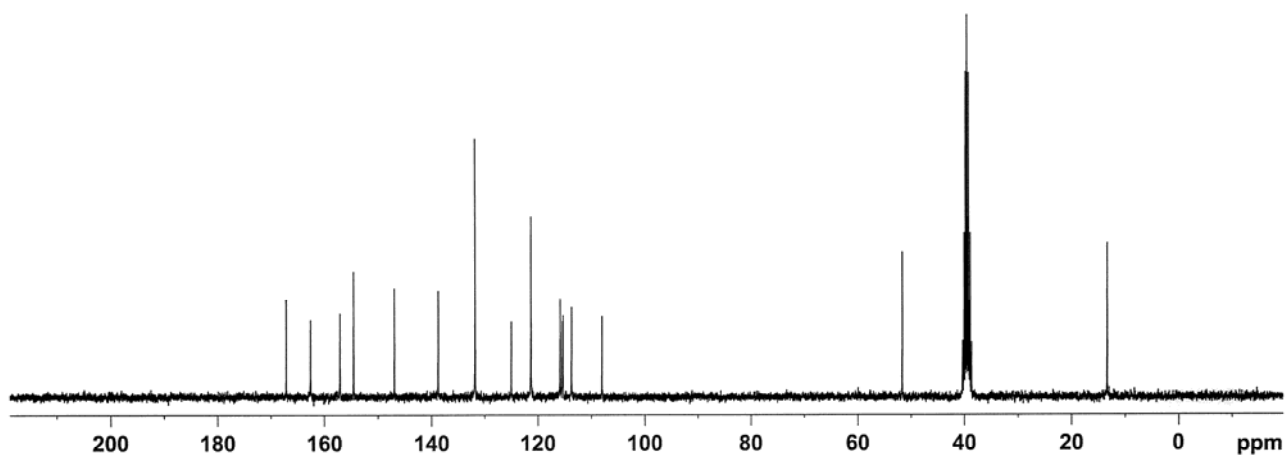



[ Mass Spectrum ]  
 Data : x9-42-C18H14BrNO5 Date : 29-Nov-2013 16:33  
 Sample : -  
 Note : -  
 Inlet : Direct Ion Mode : EI+  
 Spectrum Type : Normal Ion [EF-Linear]  
 RT : 0.58 min Scan# : (12,13)  
 BP : m/z 403.0056 Int. : 60.24  
 Output m/z range : 373.0000 to 433.0000 Cut Level : 0.00 %

Mass Spectrum of Compound 31

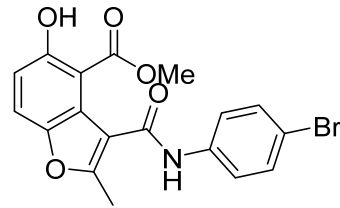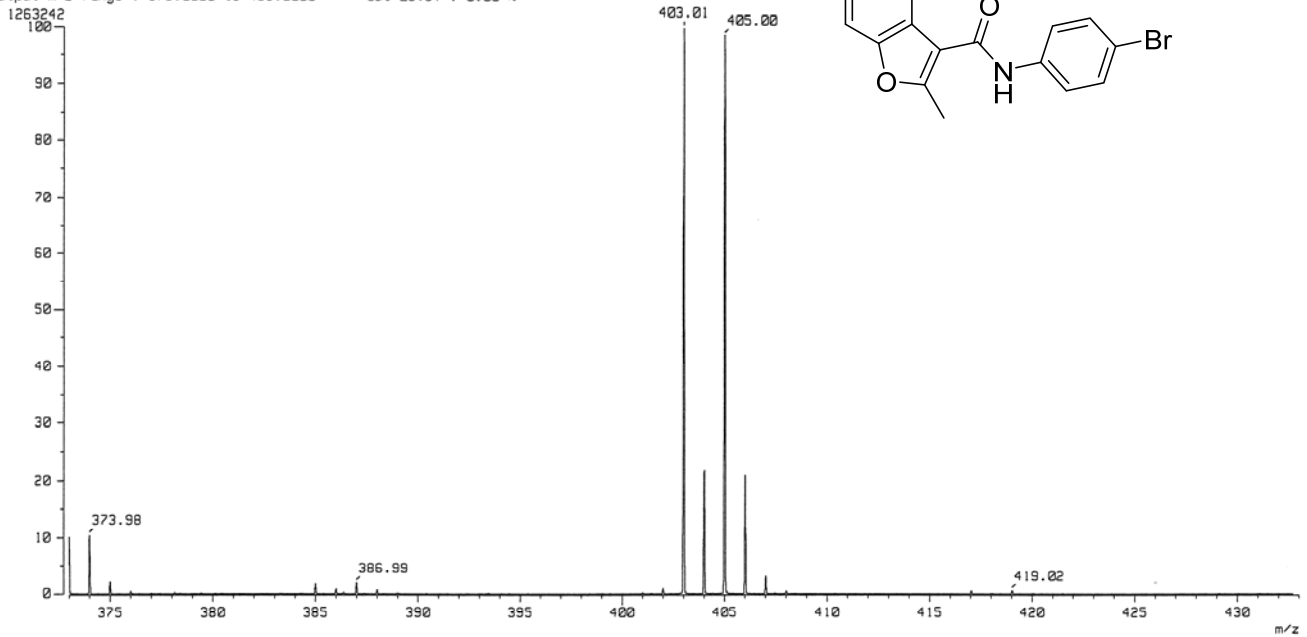

[ Elemental Composition ]

Data : x9-42-C18H14BrNO5

Date : 29-Nov-2013 16:33

Page: 1

Sample: -

Note : -

Inlet : Direct

Ion Mode : EI+

RT : 0.58 min

Scan#: (12,13)

Elements : C 18/0, H 14/0, Br 1/0, N 1/0, O 5/0

Mass Tolerance : 1000ppm, 1mmu if m/z < 1, 3mmu if m/z > 3

Unsaturation (U.S.) : -0.5 - 100.0

| Observed m/z | Int%  | Err [ppm / mmu] | U.S. Composition        |
|--------------|-------|-----------------|-------------------------|
| 373.9843     | 10.5  |                 |                         |
| 403.0056     | 100.0 | +0.1 / +0.1     | 12.0 C 18 H 14 Br N O 5 |
| 404.0078     | 22.0  |                 |                         |
| 405.0044     | 98.7  |                 |                         |
| 406.0074     | 21.1  |                 |                         |

<sup>1</sup>H NMR of Compound **32**

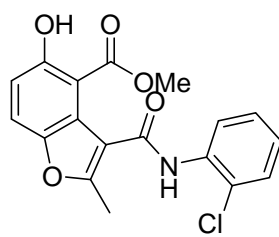

300 MHz, DMSO-d<sub>6</sub>

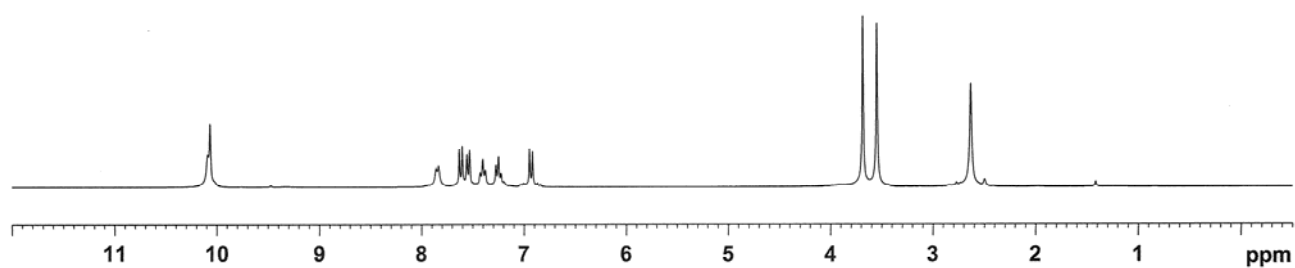

<sup>13</sup>C NMR of Compound **32**

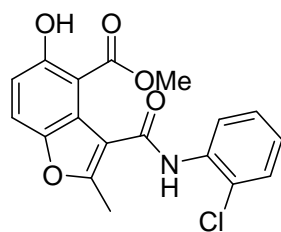

75 MHz, DMSO-d<sub>6</sub>

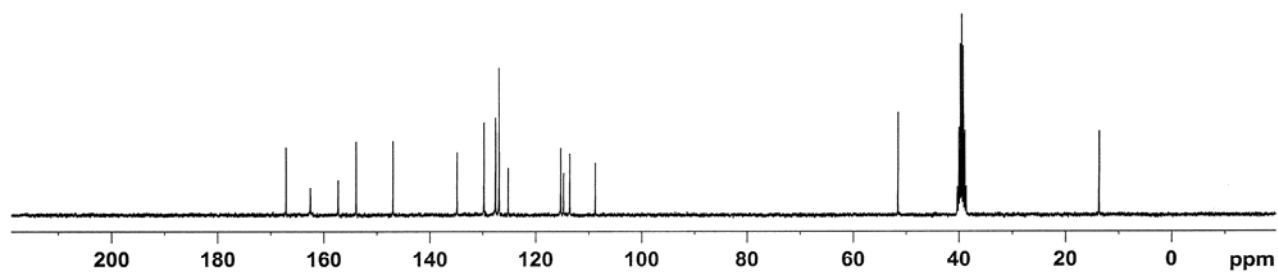

[ Mass Spectrum ]  
 Date : x9-41-C18H14ClNO5      Date : 29-Nov-2013 16:30  
 Sample : -  
 Note : -  
 Inlet : Direct      Ion Mode : EI+  
 Spectrum type : Normal Ion [EF-Linear]  
 RT : 0.53 min      Scan# : (11,12)  
 BP : m/z 359.0559      Int. : 67.66  
 Output m/z range : 329.0000 to 389.0000      Cut Level : 0.00 %

Mass Spectrum of Compound 32

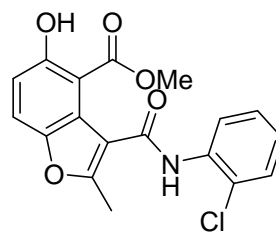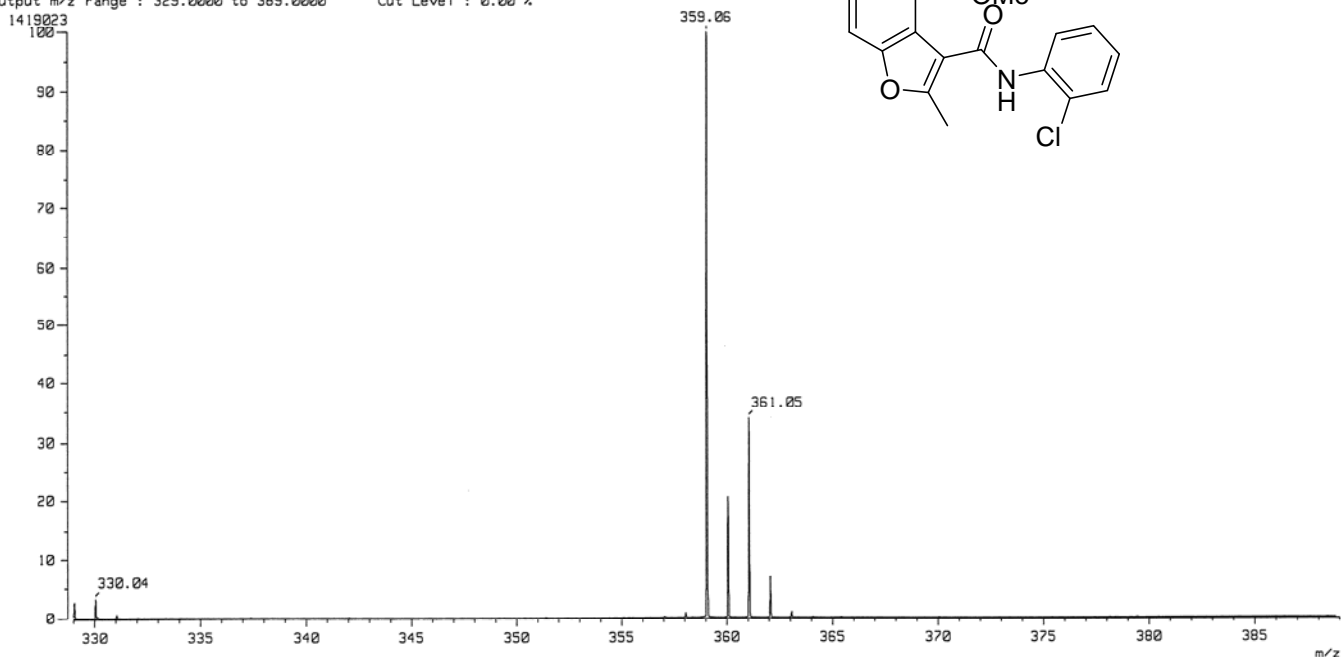

[ Elemental Composition ]

Data : x9-41-C18H14ClNO5      Date : 29-Nov-2013 16:30  
 Sample : -  
 Note : -  
 Inlet : Direct      Ion Mode : EI+  
 RT : 0.53 min      Scan# : (11,12)  
 Elements : C 18/0, H 14/0, Cl 1/0, N 1/0, O 5/0  
 Mass Tolerance : 1000ppm, 1mmu if m/z < 1, 3mmu if m/z > 3  
 Unsaturation (U.S.) : -0.5 - 100.0

| Observed m/z | Int%  | Err [ppm / mmu] | U.S. Composition        |
|--------------|-------|-----------------|-------------------------|
| 359.0559     | 100.0 | -0.3 / -0.1     | 12.0 C 18 H 14 Cl N O 5 |
| 360.0593     | 20.6  |                 |                         |
| 361.0546     | 34.0  |                 |                         |

<sup>1</sup>H NMR of Compound 33

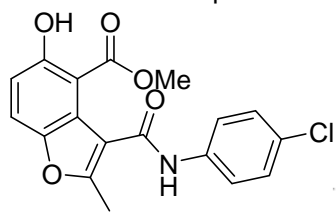

300 MHz, CDCl<sub>3</sub>

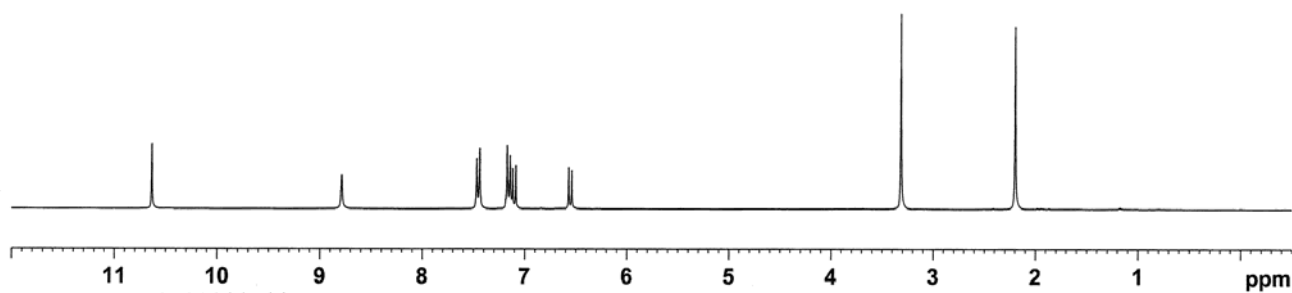

<sup>13</sup>C NMR of Compound 33

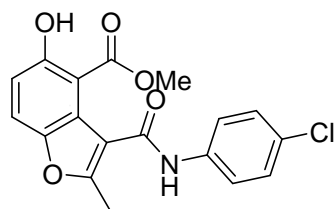

75 MHz, CDCl<sub>3</sub>

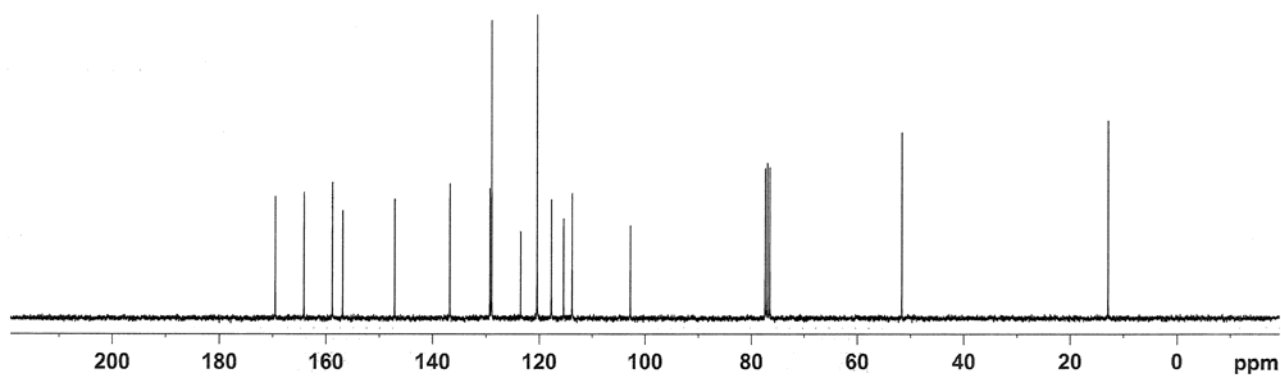

[ Mass Spectrum ]  
 Data : x9-22-C18H14ClNO5 Date : 29-Nov-2013 15:24  
 Sample : -  
 Note : -  
 Inlet : Direct Ion Mode : EI+  
 Spectrum Type : Normal Ion [EF-Linear]  
 RT : 0.58 min Scan# : (12,13)  
 BP : m/z 359.0562 Int. : 49.78  
 Output m/z range : 329.0000 to 389.0000 Cut Level : 0.00 %

Mass Spectrum of Compound 33

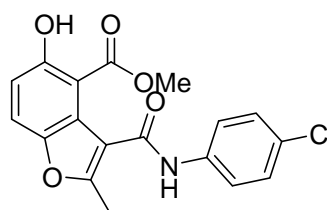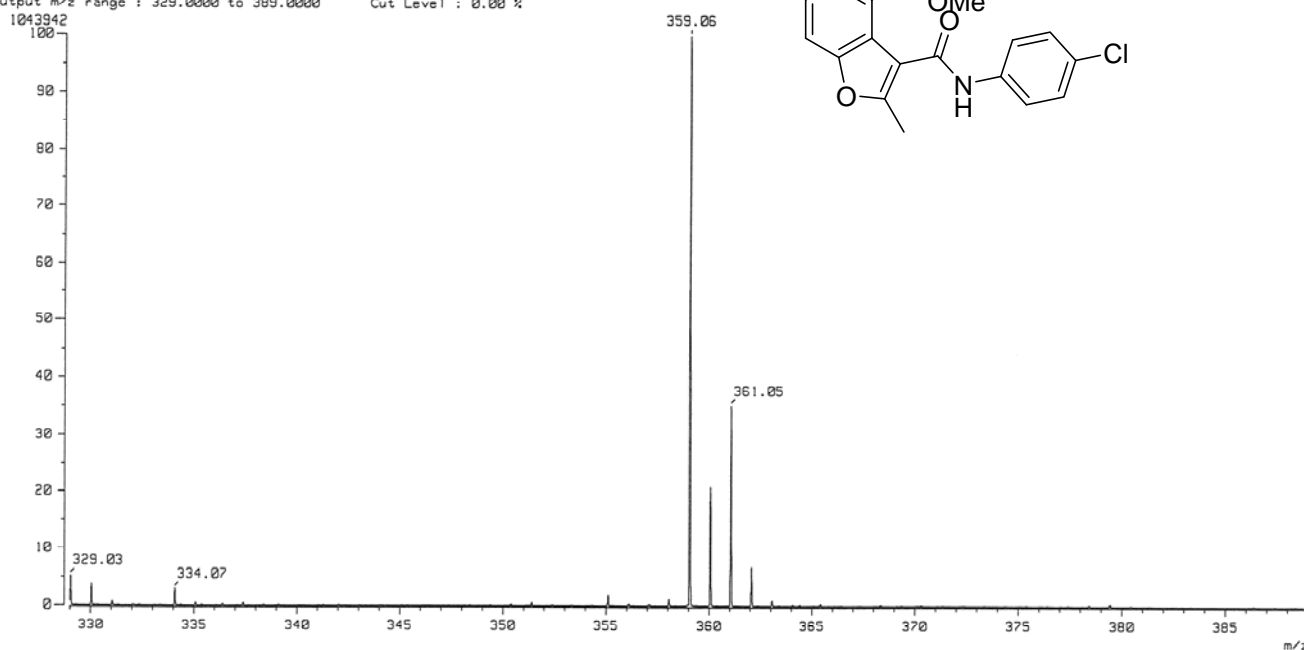

[ Elemental Composition ]

Data : x9-22-C18H14ClNO5

Date : 29-Nov-2013 15:24

Page: 1

Sample: -

Note : -

Inlet : Direct

Ion Mode : EI+

RT : 0.58 min

Scan#: (12,13)

Elements : C 18/0, H 14/0, Cl 1/0, N 1/0, O 5/0

Mass Tolerance : 1000ppm, 1mmu if m/z < 1, 3mmu if m/z > 3

Unsaturation (U.S.) : -0.5 - 100.0

| Observed m/z | Int%  | Err [ppm / mmu] | U.S. | Composition        |
|--------------|-------|-----------------|------|--------------------|
| 359.0562     | 100.0 | +0.5 / +0.2     | 12.0 | C 18 H 14 Cl N O 5 |
| 360.0583     | 21.1  |                 |      |                    |
| 361.0533     | 35.2  |                 |      |                    |

<sup>1</sup>H NMR of Compound 34

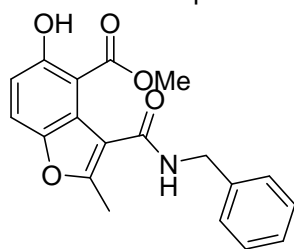

300 MHz, CDCl<sub>3</sub>

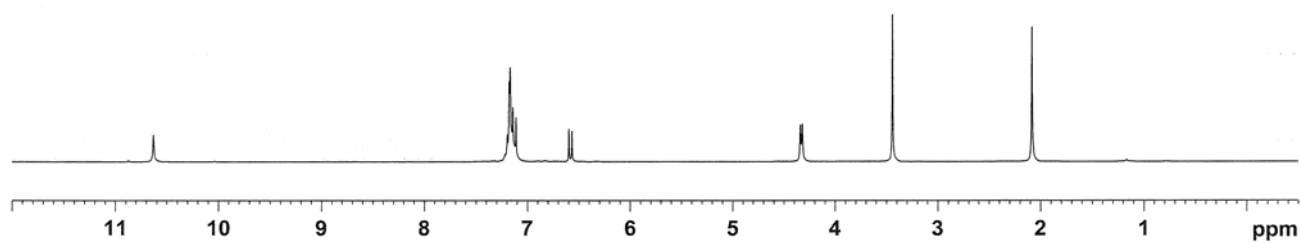

<sup>13</sup>C NMR of Compound 34

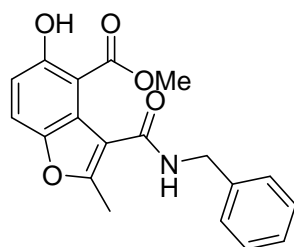

75 MHz, CDCl<sub>3</sub>

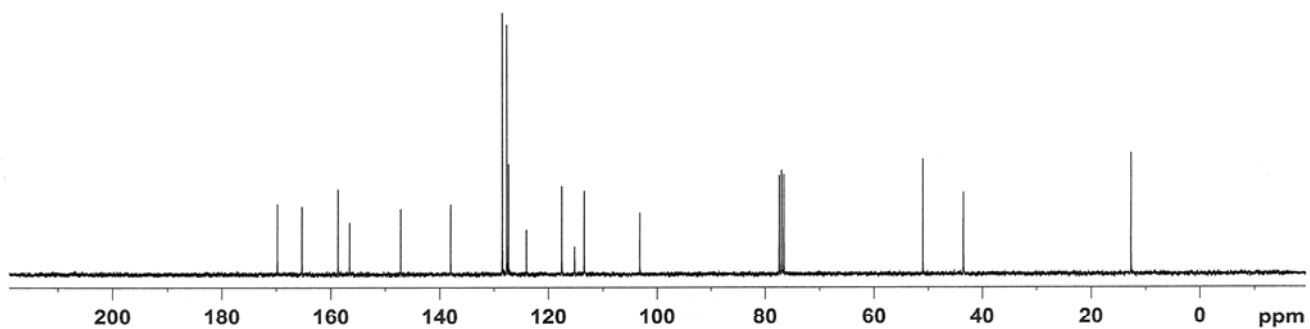

[ Mass Spectrum ]  
 Date : 29-Nov-2013 15:28  
 Data : x9-23-C19H17NO5  
 Sample : -  
 Note : -  
 Inlet : Direct Ion Mode : EI+  
 Spectrum Type : Normal Ion [EF-Linear]  
 RT : 0.63 min Scan# : (13,14)  
 BP : m/z 339.1108 Int. : 62.28  
 Output m/z range : 309.0000 to 369.0000 Cut Level : 0.00 %

Mass Spectrum of Compound 34

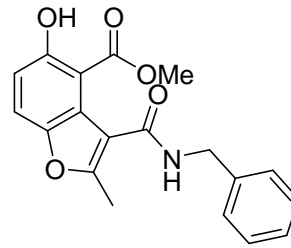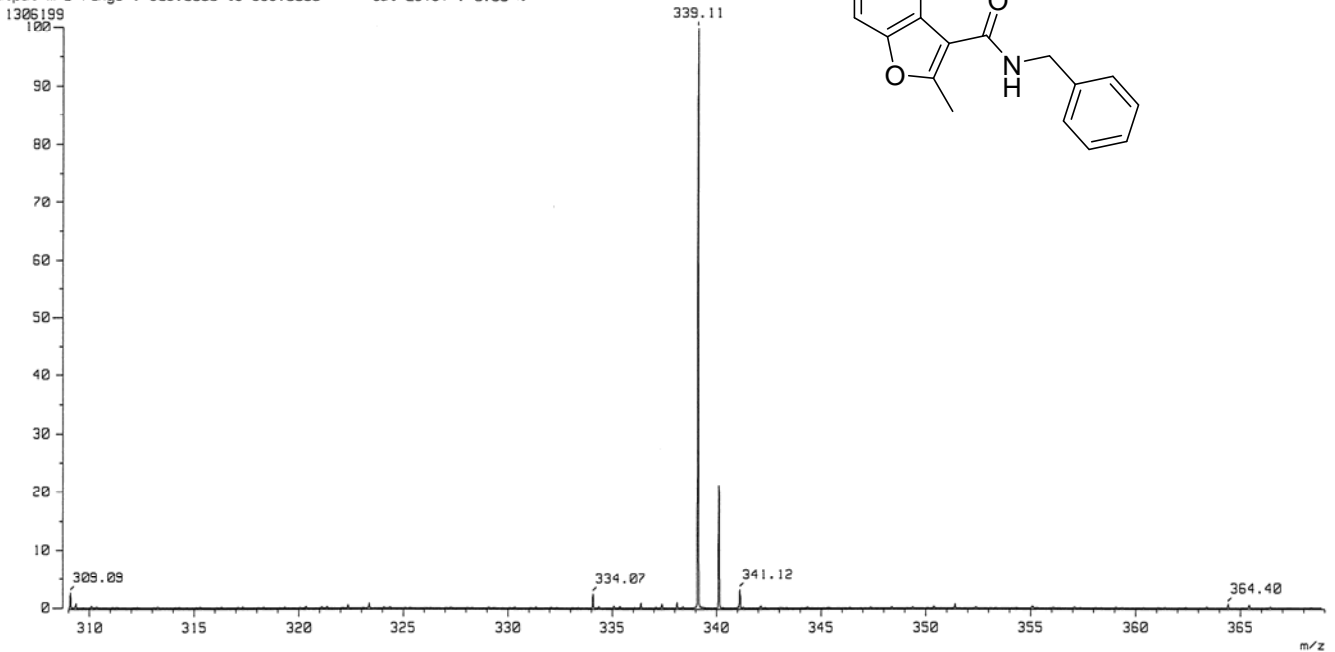

[ Elemental Composition ]

Date : 29-Nov-2013 15:28  
 Data : x9-23-C19H17NO5  
 Sample : -  
 Note : -  
 Inlet : Direct Ion Mode : EI+  
 RT : 0.63 min Scan# : (13,14)  
 Elements : C 19/0, H 17/0, N 1/0, O 5/0  
 Mass Tolerance : 1000ppm, 1mmu if m/z < 1, 3mmu if m/z > 3  
 Unsaturation (U.S.) : -0.5 - 100.0

| Observed m/z | Int%  | Err [ppm / mmu] | U.S. Composition     |
|--------------|-------|-----------------|----------------------|
| 339.1108     | 100.0 | +0.4 / +0.1     | 12.0 C 19 H 17 N O 5 |
| 340.1134     | 21.2  |                 |                      |

<sup>1</sup>H NMR of Compound 35

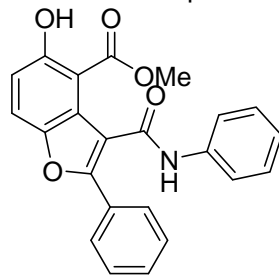

300 MHz, CDCl<sub>3</sub>

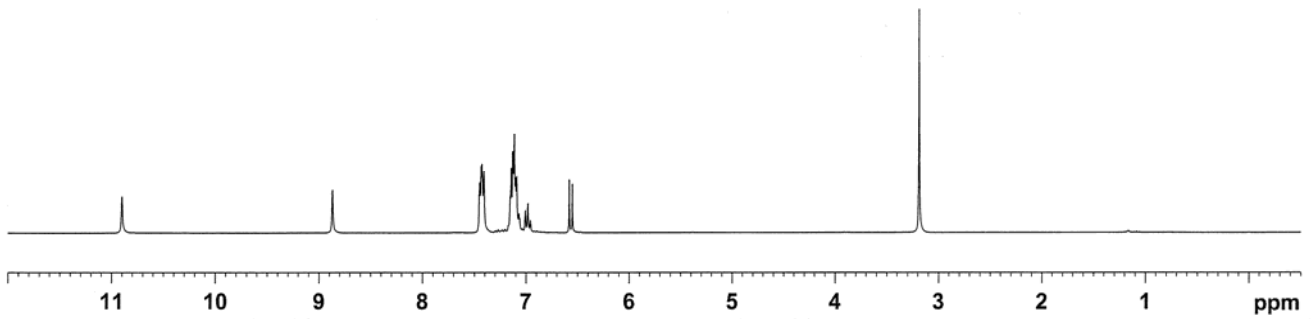

<sup>13</sup>C NMR of Compound 35

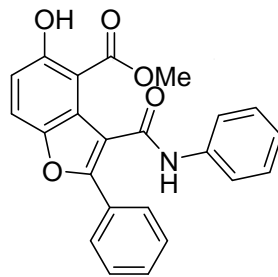

75 MHz, CDCl<sub>3</sub>

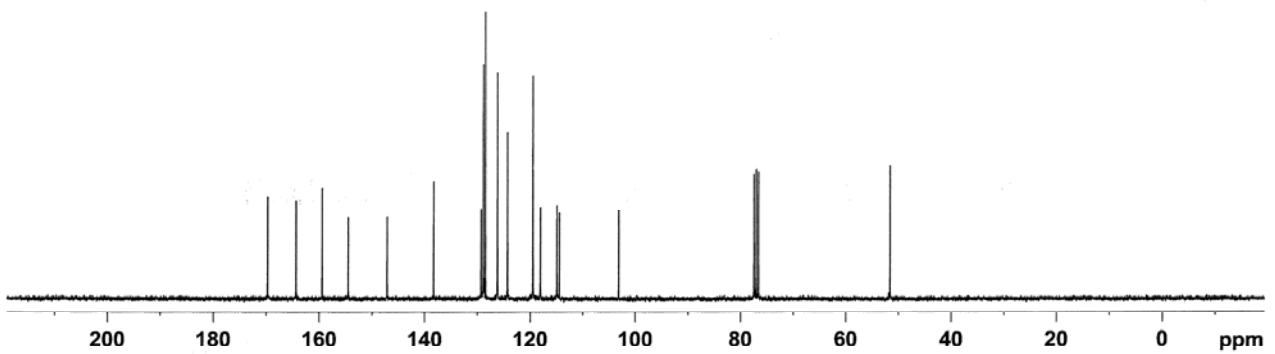



[ Mass Spectrum ]  
 Data : x9-24-C23H17NO5 Date : 29-Nov-2013 15:31  
 Sample : -  
 Note : -  
 Inlet : Direct Ion Mode : EI+  
 Spectrum Type : Normal Ion [EF-Linear]  
 RT : 0.98 min Scan# : (20,21)  
 BP : m/z 387.1107 Int. : 24.14  
 Output m/z range : 357.0000 to 417.0000 Cut Level : 0.00 %

Mass Spectrum of Compound 35

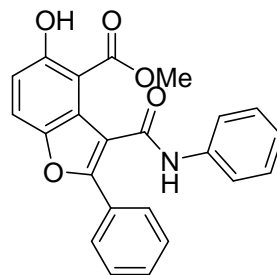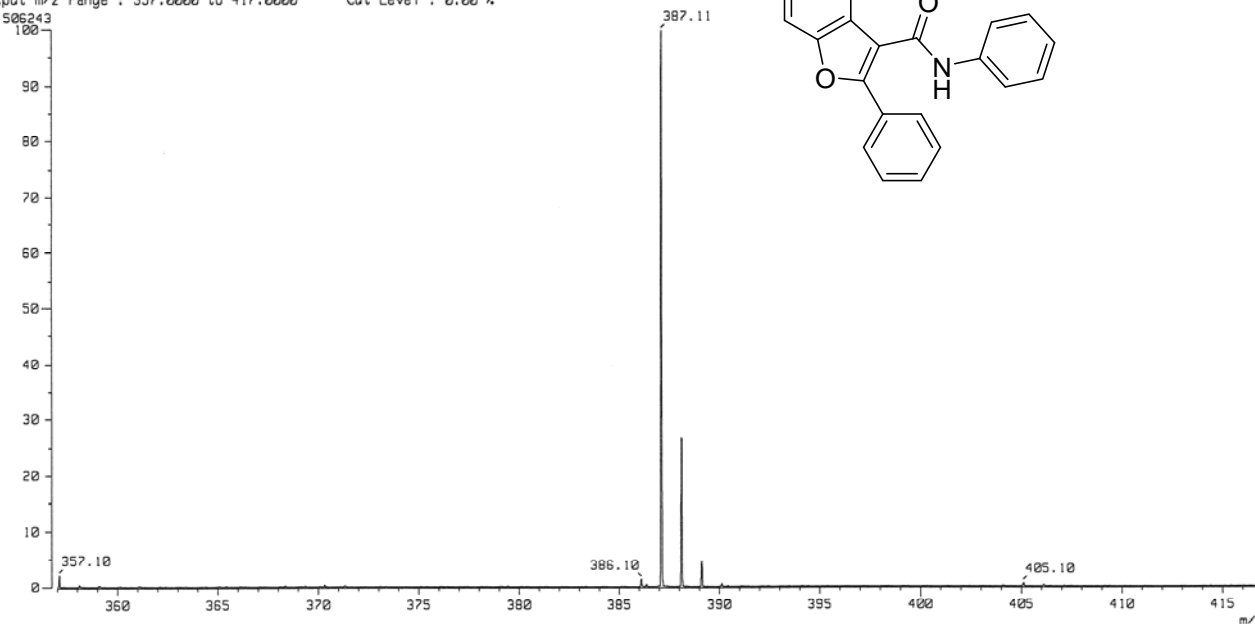

[ Elemental Composition ]

Data : x9-24-C23H17NO5

Date : 29-Nov-2013 15:31

Page: 1

Sample: -

Note : -

Inlet : Direct

Ion Mode : EI+

RT : 0.98 min

Scan#: (20,21)

Elements : C 23/0, H 17/0, N 1/0, O 5/0

Mass Tolerance : 1000ppm, 1mmu if m/z < 1, 3mmu if m/z > 3

Unsaturation (U.S.) : -0.5 - 100.0

| Observed m/z | Int%  | Err [ppm / mmu] | U.S. Composition     |
|--------------|-------|-----------------|----------------------|
| 387.1107     | 100.0 | +0.2 / +0.1     | 16.0 C 23 H 17 N O 5 |
| 388.1141     | 26.8  |                 |                      |

<sup>1</sup>H NMR of Compound 36

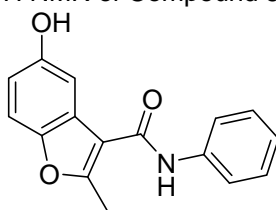

300 MHz, DMSO-d<sub>6</sub>

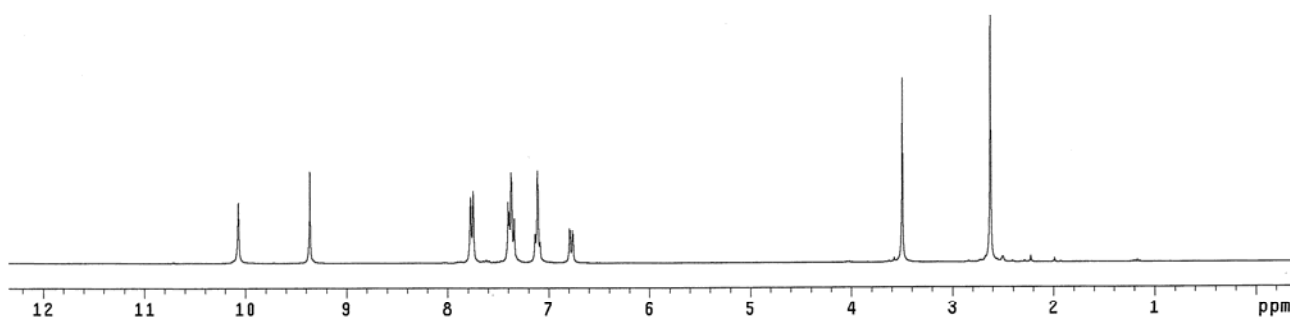

<sup>13</sup>C NMR of Compound 36

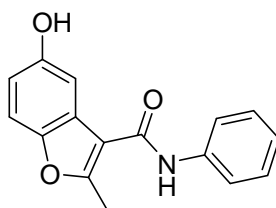

75 MHz, DMSO-d<sub>6</sub>

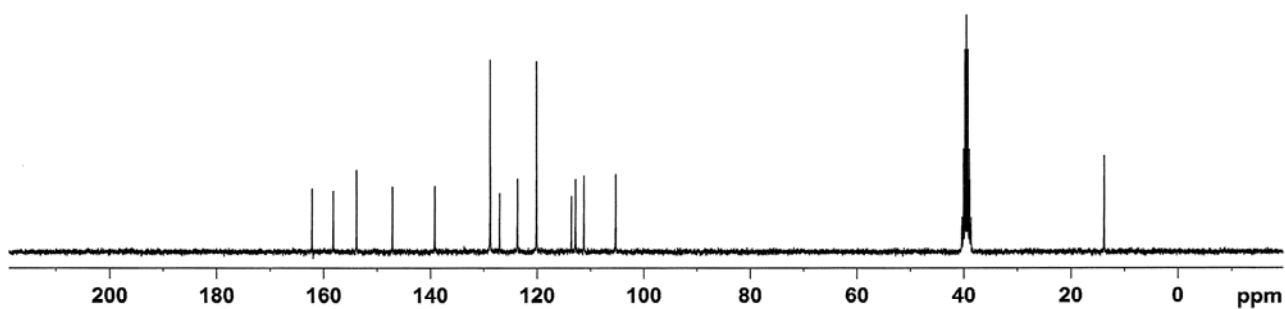

[ Mass Spectrum ]  
 Date : 29-Nov-2013 15:35  
 Sample : -  
 Note : -  
 Inlet : Direct Ion Mode : EI+  
 Spectrum Type : Normal Ion [EF-Linear]  
 RT : 0.78 min Scan# : (16,17)  
 BP : m/z 267.0898 Int. : 55.60  
 Output m/z range : 237.0000 to 297.0000 Cut Level : 0.00 %

Mass Spectrum of Compound 36

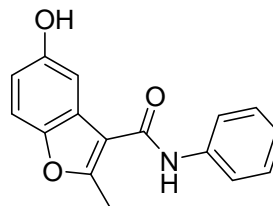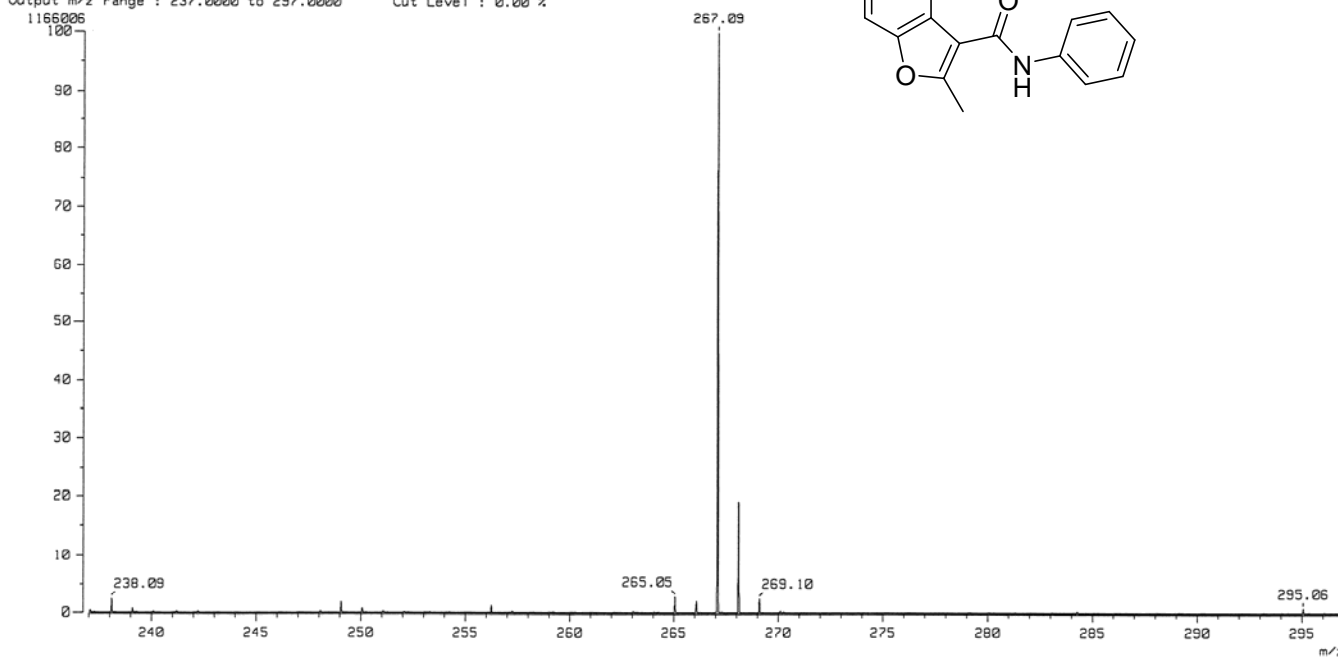

[ Elemental Composition ]

Data : x9-25-C16H13NO3 Date : 29-Nov-2013 15:35  
 Sample : -  
 Note : -  
 Inlet : Direct Ion Mode : EI+  
 RT : 0.78 min Scan# : (16,17)  
 Elements : C 16/0, H 13/0, N 1/0, O 3/0  
 Mass Tolerance : 1000ppm, 1mmu if m/z < 1, 3mmu if m/z > 3  
 Unsaturation (U.S.) : -0.5 - 100.0

| Observed m/z | Int%  | Err [ppm / mmu] | U.S. | Composition     |
|--------------|-------|-----------------|------|-----------------|
| 267.0898     | 100.0 | +1.0 / +0.3     | 11.0 | C 16 H 13 N O 3 |
| 268.0929     | 19.2  |                 |      |                 |

<sup>1</sup>H NMR of Compound 37

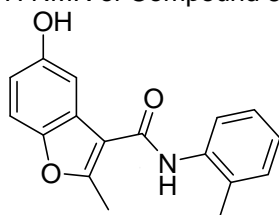

300 MHz, DMSO-d<sub>6</sub>

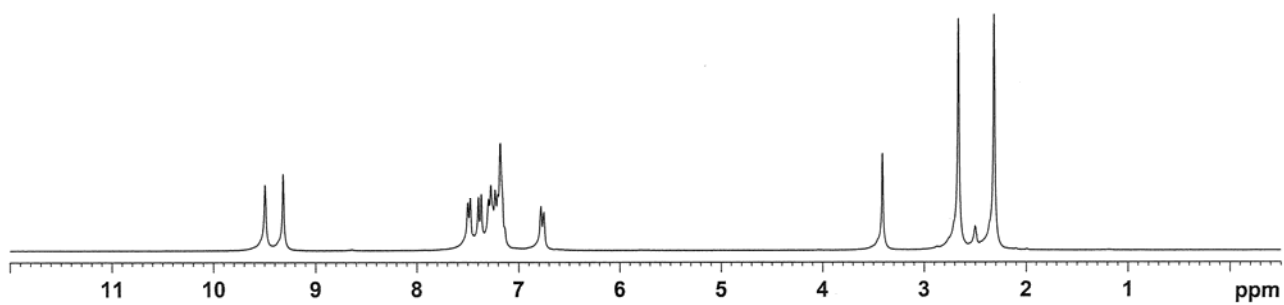

<sup>13</sup>C NMR of Compound 37

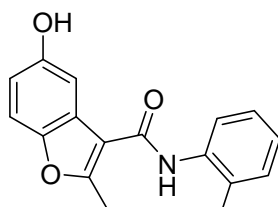

75 MHz, DMSO-d<sub>6</sub>

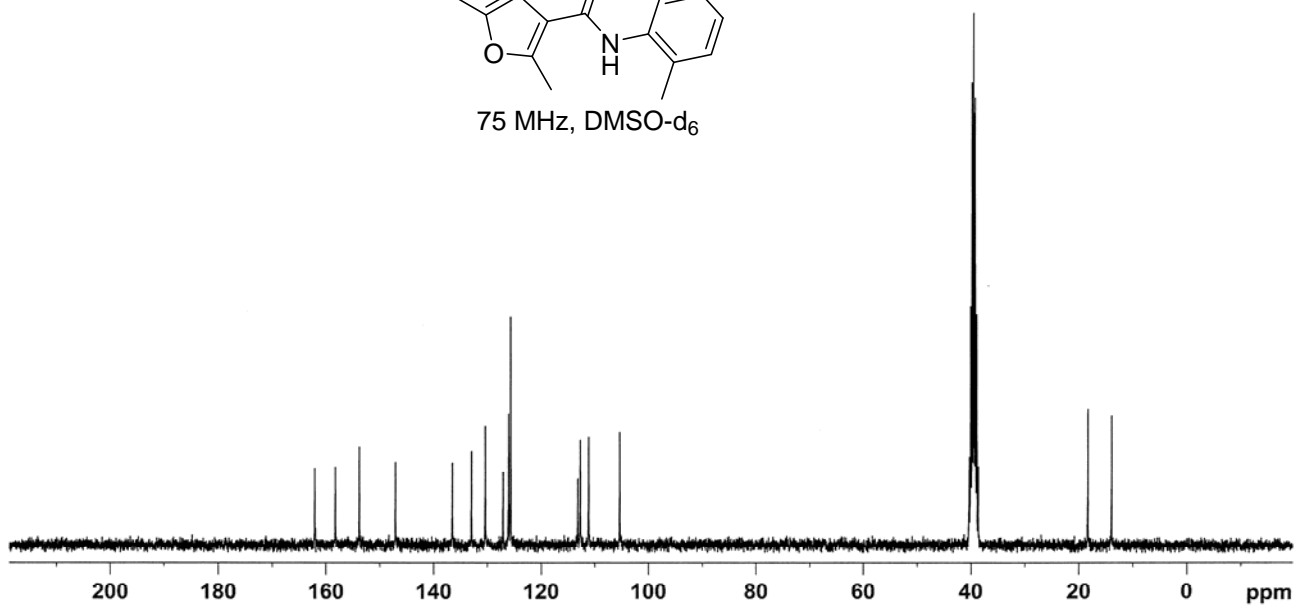

[ Mass Spectrum ]  
 Date : 29-Nov-2013 15:39  
 Sample : -  
 Note : -  
 Inlet : Direct Ion Mode : EI+  
 Spectrum Type : Normal Ion [EF-Linear]  
 RT : 0.63 min Scan# : (13,14)  
 BP : m/z 281.1053 Int. : 52.16  
 Output m/z range : 251.0000 to 311.0000 Cut Level : 0.00 %

Mass Spectrum of Compound 37

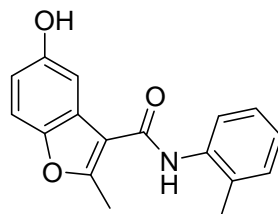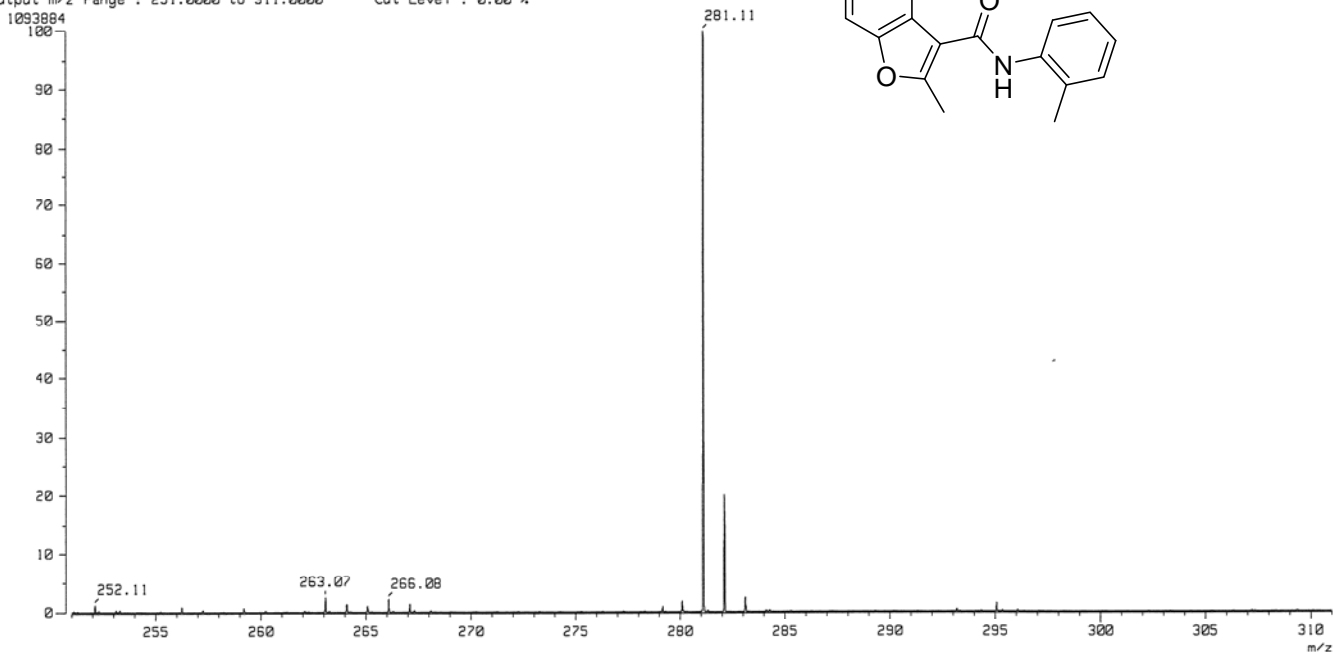

[ Elemental Composition ]

Data : x9-26-C17H15NO3 Date : 29-Nov-2013 15:39  
 Sample : -  
 Note : -  
 Inlet : Direct Ion Mode : EI+  
 RT : 0.63 min Scan# : (13,14)  
 Elements : C 17/0, H 15/0, N 1/0, O 3/0  
 Mass Tolerance : 1000ppm, 1mmu if m/z < 1, 3mmu if m/z > 3  
 Unsaturation (U.S.) : -0.5 - 100.0

| Observed m/z | Int%  | Err [ppm / mmu] | U.S. | Composition     |
|--------------|-------|-----------------|------|-----------------|
| 281.1053     | 100.0 | +0.5 / +0.2     | 11.0 | C 17 H 15 N O 3 |
| 282.1097     | 20.1  |                 |      |                 |

<sup>1</sup>H NMR of Compound 38

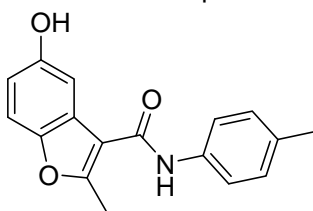

300 MHz, CDCl<sub>3</sub>

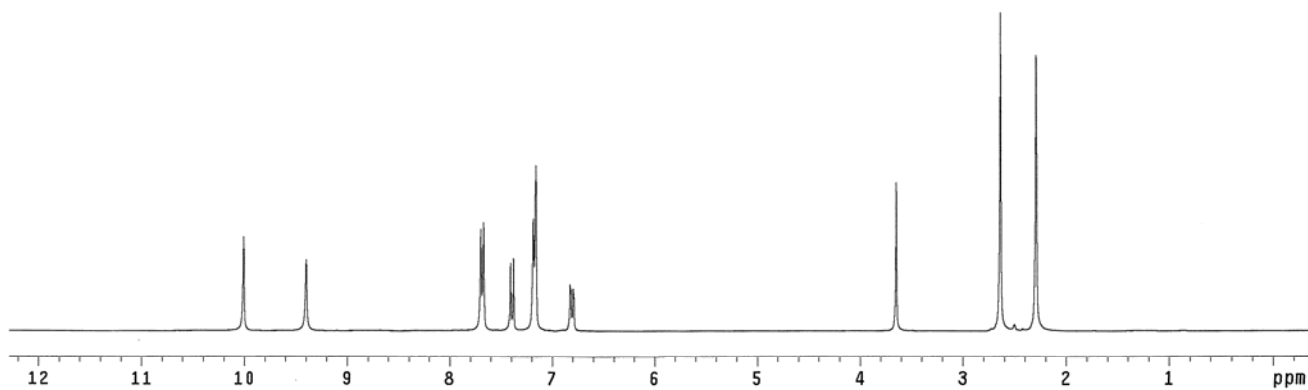

<sup>13</sup>C NMR of Compound 38

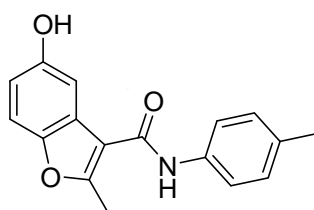

75 MHz, CDCl<sub>3</sub>

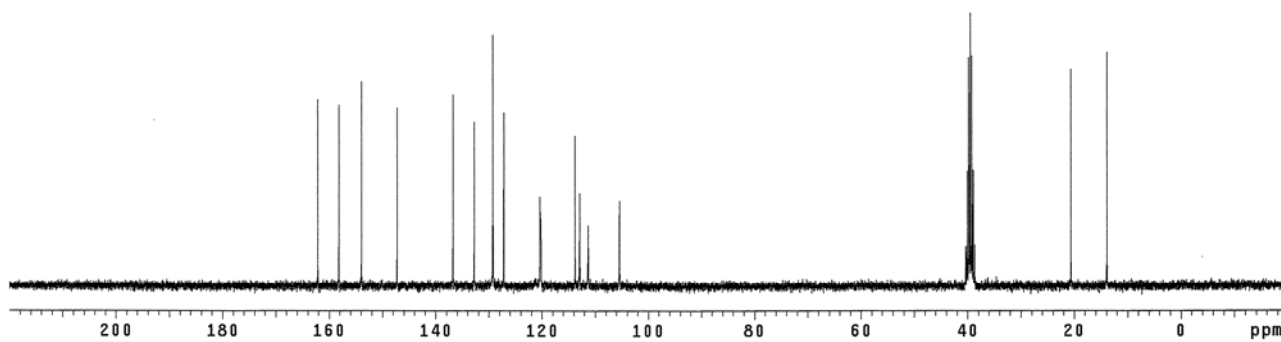

[ Mass Spectrum ]  
 Data : x9-27-C17H15NO3 Date : 29-Nov-2013 15:42  
 Sample : -  
 Note : -  
 Inlet : Direct Ion Mode : EI+  
 Spectrum Type : Normal Ion [EF-Linear]  
 RT : 0.53 min Scan# : (11,12)  
 BP : m/z 281.1055 Int. : 62.75  
 Output m/z range : 251.0000 to 311.0000 Cut Level : 0.00 %

Mass Spectrum of Compound 38

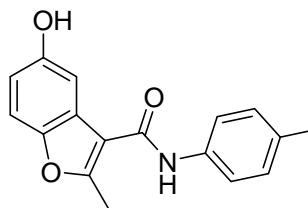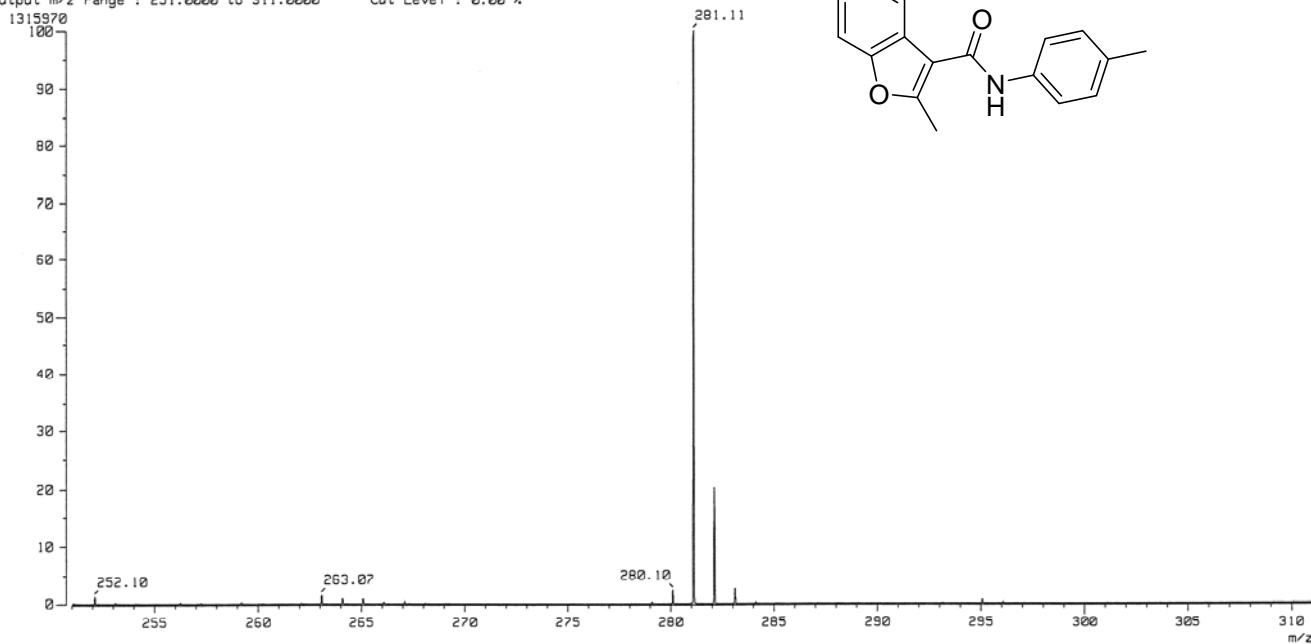

[ Elemental Composition ]

Data : x9-27-C17H15NO3 Date : 29-Nov-2013 15:42  
 Sample : -  
 Note : -  
 Inlet : Direct Ion Mode : EI+  
 RT : 0.53 min Scan# : (11,12)  
 Elements : C 17/0, H 15/0, N 1/0, O 3/0  
 Mass Tolerance : 1000ppm, 1mmu if m/z < 1, 3mmu if m/z > 3  
 Unsaturation (U.S.) : -0.5 - 100.0

| Observed m/z | Int%  | Err [ppm / mmu] | U.S. Composition     |
|--------------|-------|-----------------|----------------------|
| 281.1055     | 100.0 | +1.1 / +0.3     | 11.0 C 17 H 15 N O 3 |
| 282.1086     | 20.2  |                 |                      |

<sup>1</sup>H NMR of Compound **39**

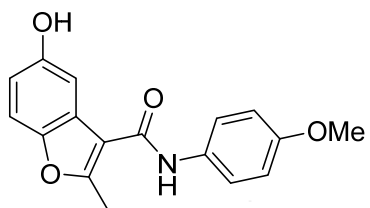

300 MHz, DMSO-d<sub>6</sub>

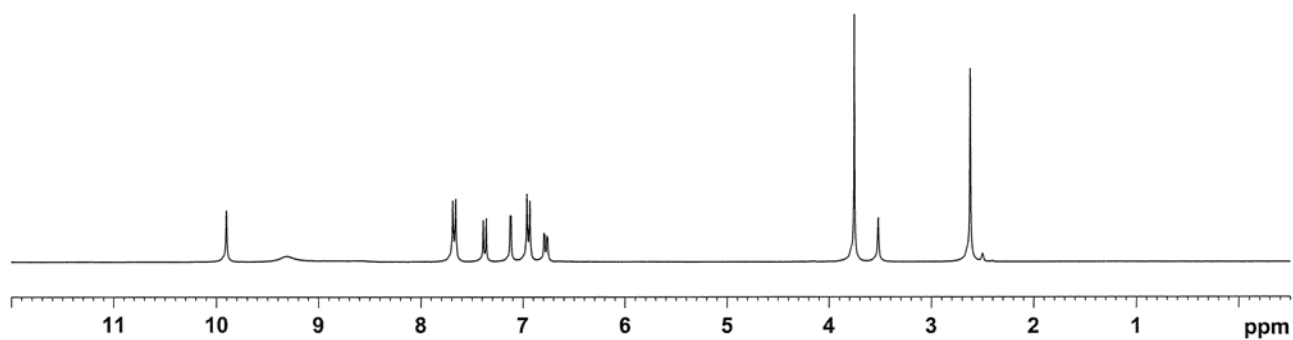

<sup>13</sup>C NMR of Compound **39**

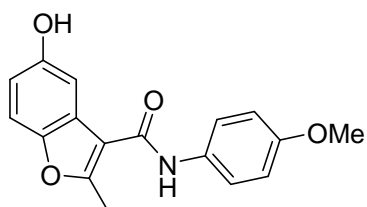

75 MHz, DMSO-d<sub>6</sub>

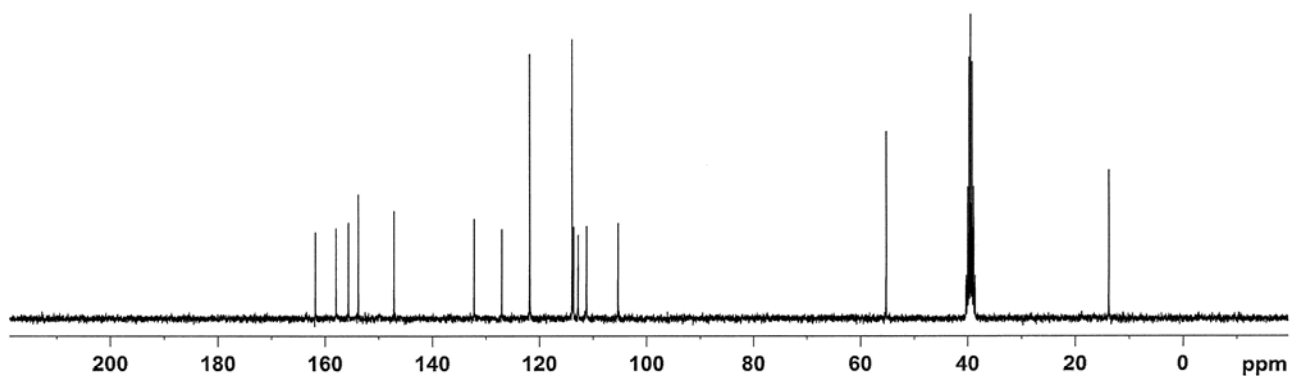



[ Mass Spectrum ]  
 Data : x9-28-C17H15NO4 Date : 29-Nov-2013 15:45  
 Sample : -  
 Note : -  
 Inlet : Direct Ion Mode : EI+  
 Spectrum Type : Normal Ion [EF-Linear]  
 RT : 0.73 min Scan# : (15,16)  
 BP : m/z 297.1003 Int. : 62.52  
 Output m/z range : 267.0000 to 327.0000 Cut Level : 0.00 %

Mass Spectrum of Compound 39

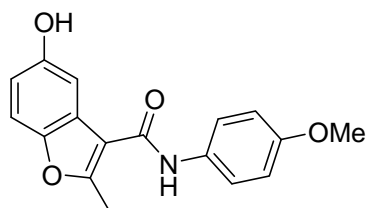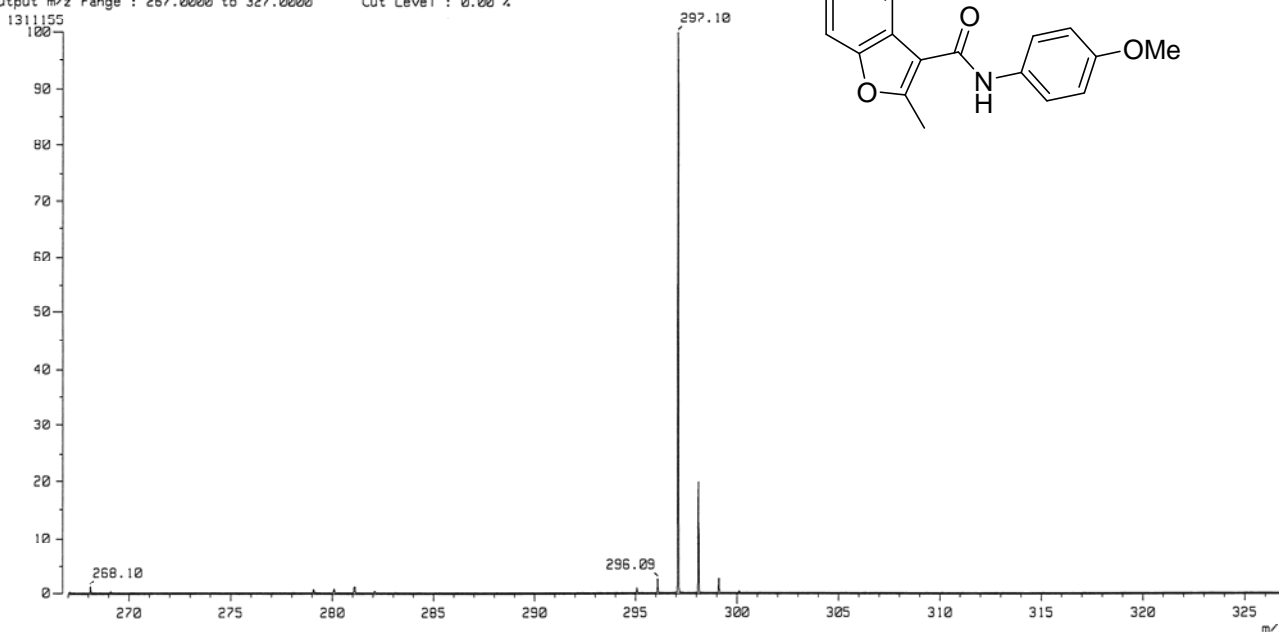

[ Elemental Composition ]

Data : x9-28-C17H15NO4 Date : 29-Nov-2013 15:45  
 Sample : -  
 Note : -  
 Inlet : Direct Ion Mode : EI+  
 RT : 0.73 min Scan# : (15,16)  
 Elements : C 17/0, H 15/0, N 1/0, O 4/0  
 Mass Tolerance : 1000ppm, 1mmu if m/z < 1, 3mmu if m/z > 3  
 Unsaturation (U.S.) : -0.5 - 100.0

| Observed m/z | Int%  | Err [ppm / mmu] | U.S. Composition     |
|--------------|-------|-----------------|----------------------|
| 297.1003     | 100.0 | +0.5 / +0.1     | 11.0 C 17 H 15 N O 4 |
| 298.1026     | 19.8  |                 |                      |

<sup>1</sup>H NMR of Compound **40**

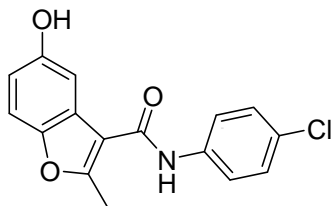

600 MHz, DMSO-d<sub>6</sub>

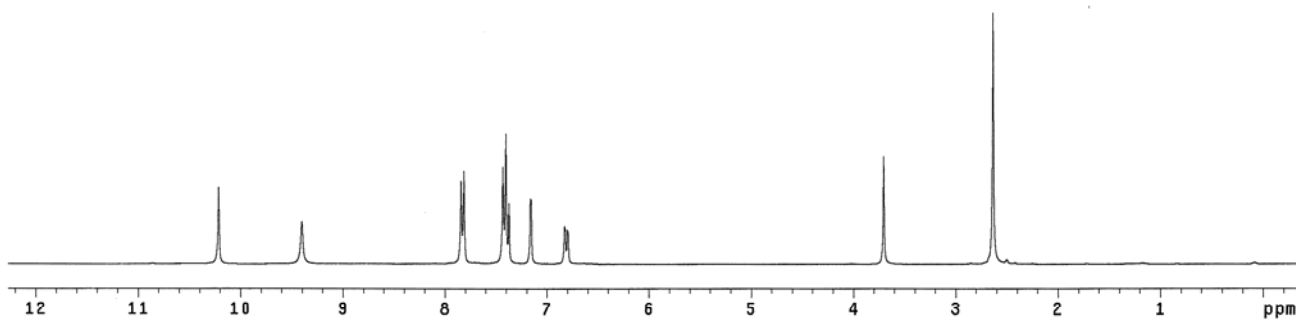

<sup>13</sup>C NMR of Compound **40**

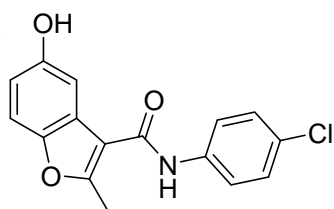

150 MHz, DMSO-d<sub>6</sub>

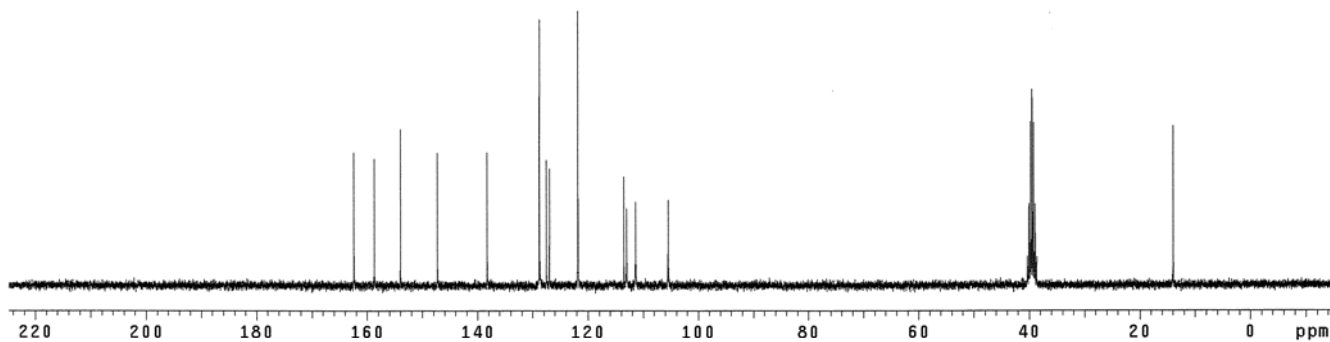

[ Mass Spectrum ]  
 Data : x9-29-C16H12ClNO3      Date : 29-Nov-2013 15:48  
 Sample : -  
 Note : -  
 Inlet : Direct      Ion Mode : EI+  
 Spectrum Type : Normal Ion [EF-Linear]  
 RT : 0.73 min      Scan# : (15,16)  
 BP : m/z 301.0508      Int. : 38.55  
 Output m/z range : 271.0000 to 331.0000      Cut Level : 0.00 %

Mass Spectrum of Compound 40

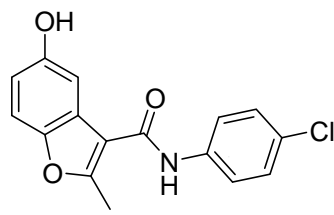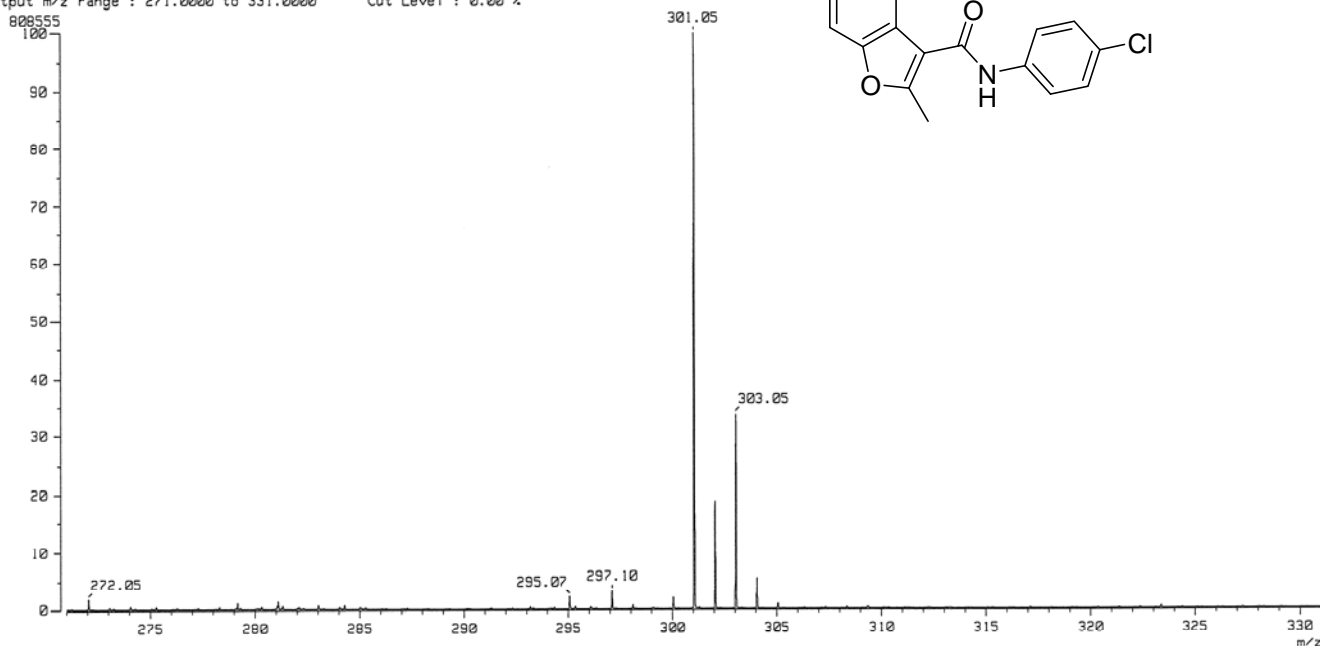

[ Elemental Composition ]

Data : x9-29-C16H12ClNO3  
 Sample : -  
 Note : -

Date : 29-Nov-2013 15:48

Page: 1

Inlet : Direct  
 RT : 0.73 min

Ion Mode : EI+  
 Scan#: (15,16)

Elements : C 16/0, H 12/0, Cl 1/0, N 1/0, O 3/0

Mass Tolerance : 1000ppm, 1mmu if m/z < 1, 3mmu if m/z > 3

Unsaturation (U.S.) : -0.5 - 100.0

| Observed m/z | Int%  | Err [ppm / mmu] | U.S. Composition        |
|--------------|-------|-----------------|-------------------------|
| 301.0508     | 100.0 | +0.7 / +0.2     | 11.0 C 16 H 12 Cl N O 3 |
| 302.0544     | 18.9  |                 |                         |
| 303.0491     | 33.9  |                 |                         |

<sup>1</sup>H NMR of Compound 41

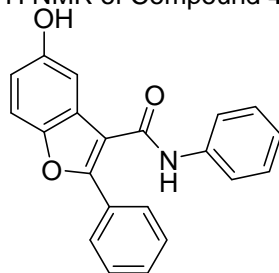

300 MHz, DMSO-d<sub>6</sub>

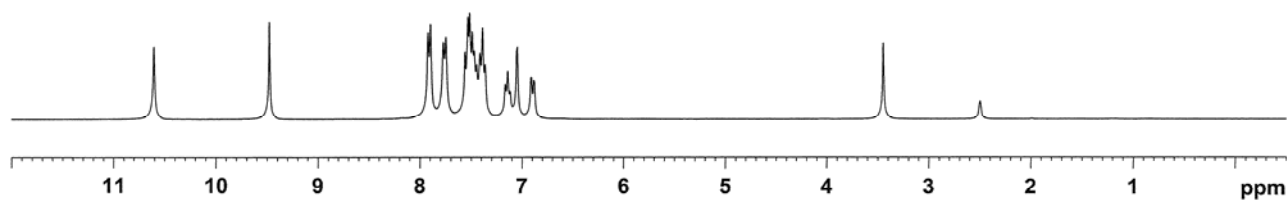

<sup>13</sup>C NMR of Compound 41

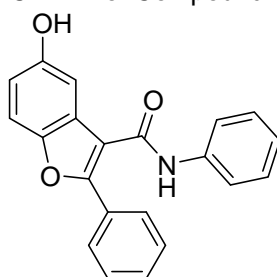

75 MHz, DMSO-d<sub>6</sub>

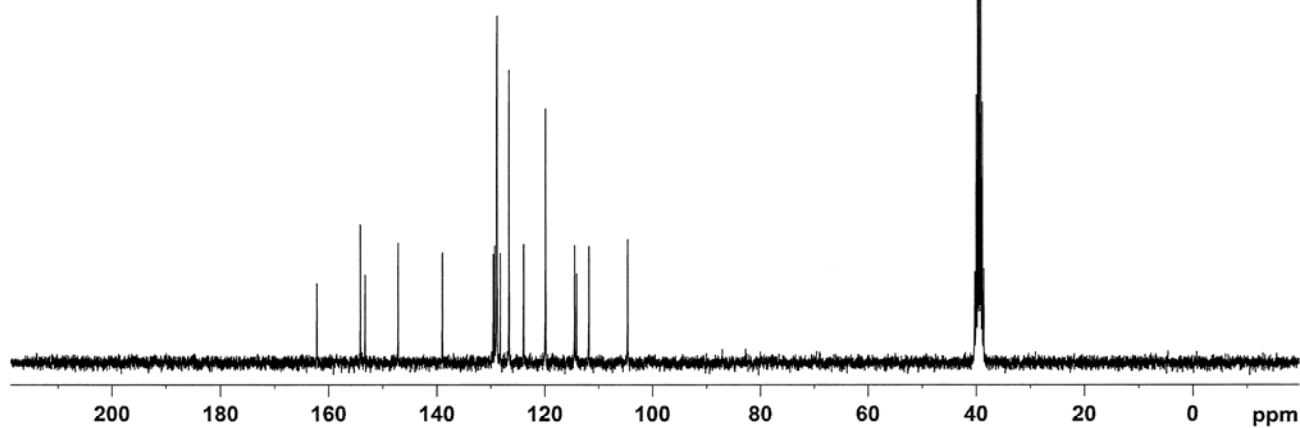

[ Mass Spectrum ]  
 Data : x9-30-C21H15NO3 Date : 29-Nov-2013 15:52  
 Sample: -  
 Note: -  
 Inlet : Direct Ion Mode : EI+  
 Spectrum Type : Normal Ion [EF-Linear]  
 RT : 0.78 min Scan# : (16,17)  
 BP : m/z 329.1050 Int. : 42.15  
 Output m/z range : 299.0000 to 359.0000 Cut Level : 0.00 %

Mass Spectrum of Compound 41

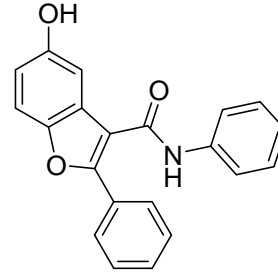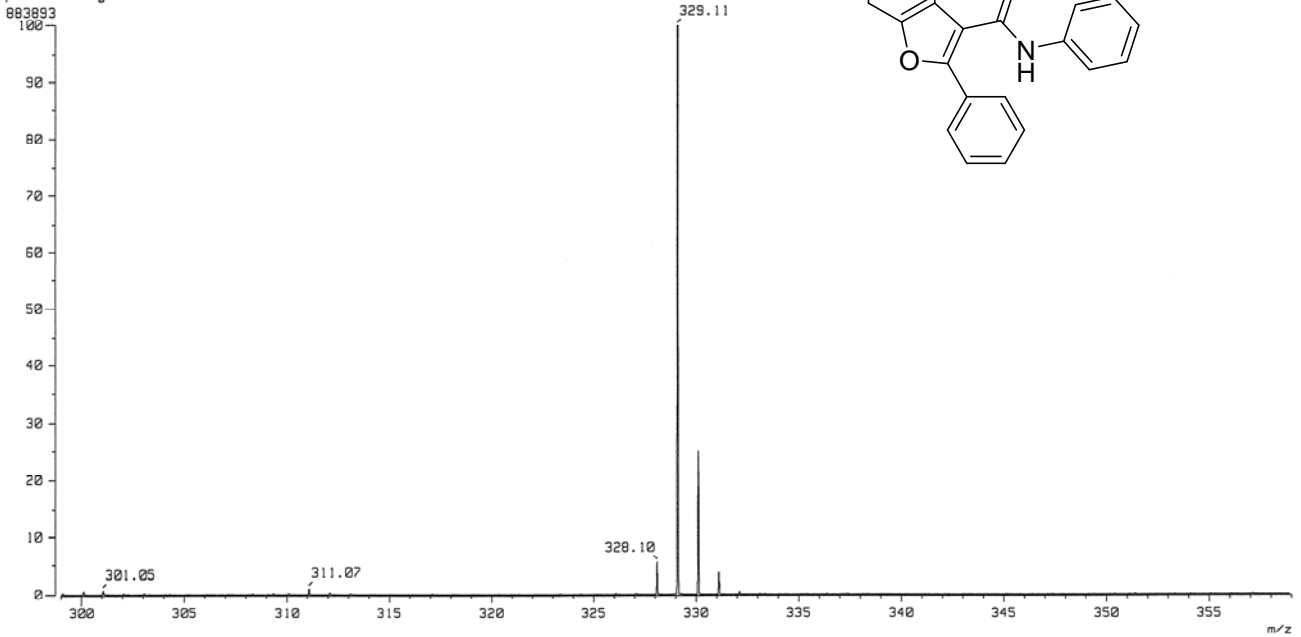

[ Elemental Composition ]

Data : x9-30-C21H15NO3 Date : 29-Nov-2013 15:52  
 Sample: -  
 Note: -  
 Inlet : Direct Ion Mode : EI+  
 RT : 0.78 min Scan#: (16,17)  
 Elements : C 21/0, H 15/0, N 1/0, O 3/0  
 Mass Tolerance : 1000ppm, 1mmu if m/z < 1, 3mmu if m/z > 3  
 Unsaturation (U.S.) : -0.5 - 100.0

| Observed m/z | Int%  | Err [ppm / mmu] | U.S. Composition     |
|--------------|-------|-----------------|----------------------|
| 329.1050     | 100.0 | -0.6 / -0.2     | 15.0 C 21 H 15 N O 3 |
| 330.1084     | 25.0  |                 |                      |
